# Supplementary material
Source: PubMed Central journal article supplement (PMC4015219)
Supplement: Supp_Data.pdf [file Supp_Data.pdf]

## Supplementary Data

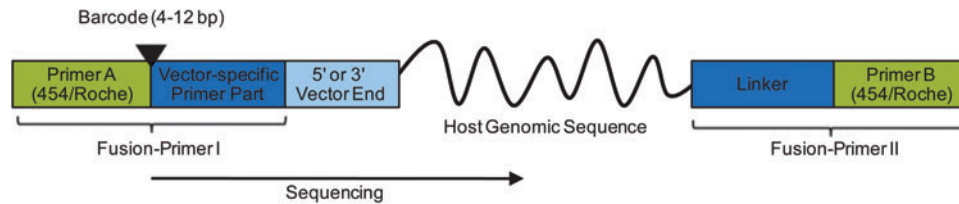

**SUPPLEMENTARY FIG. S1.** Linear amplification-mediated (LAM)-PCR amplicon structure. After fusion-primer PCR, the resulting LAM-PCR amplicons have the displayed structure and can be sequenced directly with the genome sequencer (454/Roche). The resulting raw sequence reads consist of a vector-specific fusion-primer sequence, the remaining terminal vector sequence, and the host genomic sequence. The linker sequence at the 3' end may not be reached because of high amplicon length. The same holds true for primer B. All sequences flanking the amplified host genomic sequence are removed before its alignment to the reference genome. Notably, in the case of Sanger sequencing and shotgun cloning, the resulting raw sequence reads consist also of plasmid sequences of different lengths at the 5' and 3' ends. In addition, the orientation of the vector host genome construct can be reversed. The high-throughput insertion site analysis pipeline (HISAP) first screens the vector-specific primer sequence in the forward orientation and, if no vector-specific primer sequence is identified, analyzes the reverse complement sequence.

**a**

Welcome Settings **Query Upload** Job Summary

Enter e-Mail Address  ?

Confirm e-Mail Address  ?

Enter Job Name  ?

SEQ-Type 454 Life Sciences  Sanger ?

LAM-Direction 3' LAM-PCR  5' LAM-PCR ?

Target Genome HomoSapiens (NCBI37, HG19)  MusMusculus (NCBI37, mm9) RattusNorvegicus (Baylor 3.4, rn4) ?

Trimming - Template Other  HIV, SFFV, MLV, None ?

Trimming - MegaPrimer  ?

Trimming - Vector-LTR  ?

Trimming - Linker  ?

Upload Vector Sequence  Durchsuchen... ?

Save Settings

**b**

Welcome Settings **Query Upload** Job Summary

Query File #1  C:\Project1\sample1.fna Browse... ?

Query File #2  C:\Project1\sample2.fna Browse... ?

Query File #3  C:\Project1\sample3.fna Browse... ?

Query File #4  Browse... ?

Query File #5  Browse... ?

Query File #6  Browse... ?

Query File #7  Browse... ?

Query File #8  Browse... ?

Query File #9  Browse... ?

Query File #10  Browse... ?

Upload Files

**c**

Welcome Settings **Query Upload** Job Summary

e-Mail Address hisap.user@nct-heidelberg.de

Job Name job no.1

SEQ-Type 454 Life Sciences

LAM-Direction 3' lamPCR

Target Genome HomoSapiens (NCBI37, HG19)

Trimming Template Lenti

Query File #1 FileName: sample1.fna, SeqCount: 392 X

Query File #2 FileName: sample2.fna, SeqCount: 224 X

Query File #3 FileName: sample3.fna, SeqCount: 448 X

By submitting jobs to HISAP you agree with our terms & conditions. For citing HISAP see Welcome.

Submit Job

Query files successfully uploaded.

**SUPPLEMENTARY FIG. S2.** HISAP screenshots. An HISAP submission consists of three steps: (a) User- and experiment-specific information enables the selection of relevant parameters for the HISAP analysis and for notification when the analysis is complete. The upload of the respective vector sequence is optional and not required for HISAP analysis. (b) The multiple FASTA sequence files of the project are uploaded to the server. A large number of sequence files can be combined into a zip archive and uploaded. (c) The information supplied in the previous steps is summarized and HISAP can be started.

---

SUPPLEMENTARY TABLE S1.

---

chr, chromosome; M, months after stem cell transplantation at which the samples were taken; Ori, orientation of vector integration.

*Note:* All insertion sites (IS) found in the analyzed samples are listed. To follow the IS over the time course, the total sequence numbers obtained for a certain IS from different cell fractions at a single time point are summarized. The column "N Times Found" indicates whether a given IS clone is detected at one or more time points.

---

Supplementary Table 1: IS tracking over time

| Gene         | IS Locus | Chr | Ori | N Times Found | M6  | M9  | M12 | M17 | M21 | M24 |
|--------------|----------|-----|-----|---------------|-----|-----|-----|-----|-----|-----|
| GNB1         | 1819462  | 1   | -   | 1             | 3   | 0   | 0   | 0   | 0   | 0   |
| ACTRT2       | 2961405  | 1   | -   | 1             | 0   | 0   | 0   | 0   | 0   | 2   |
| CAMTA1       | 6917966  | 1   | +   | 1             | 0   | 0   | 0   | 0   | 0   | 4   |
| KIF1B        | 10295588 | 1   | +   | 1             | 0   | 0   | 0   | 0   | 2   | 0   |
| KIF1B        | 10352445 | 1   | -   | 1             | 0   | 0   | 7   | 0   | 0   | 0   |
| EXOSC10      | 11134848 | 1   | -   | 1             | 0   | 2   | 0   | 0   | 0   | 0   |
| TNFRSF1B     | 12219199 | 1   | +   | 1             | 0   | 0   | 0   | 0   | 7   | 0   |
| SPEN         | 16220647 | 1   | +   | 1             | 0   | 0   | 9   | 0   | 0   | 0   |
| SPEN         | 16222374 | 1   | -   | 1             | 0   | 0   | 0   | 0   | 2   | 0   |
| PADI1        | 17572453 | 1   | +   | 2             | 170 | 0   | 0   | 9   | 0   | 0   |
| UBR4         | 19510558 | 1   | -   | 1             | 0   | 0   | 0   | 4   | 0   | 0   |
| CAPZB        | 19759030 | 1   | -   | 1             | 0   | 0   | 0   | 0   | 16  | 0   |
| EIF4G3       | 21221570 | 1   | -   | 1             | 0   | 0   | 7   | 0   | 0   | 0   |
| EIF4G3       | 21247607 | 1   | +   | 1             | 0   | 1   | 0   | 0   | 0   | 0   |
| EIF4G3       | 21279828 | 1   | -   | 1             | 0   | 0   | 0   | 0   | 0   | 1   |
| EIF4G3       | 21325184 | 1   | +   | 1             | 1   | 0   | 0   | 0   | 0   | 0   |
| EIF4G3       | 21500487 | 1   | +   | 1             | 16  | 0   | 0   | 0   | 0   | 0   |
| USP48        | 22073856 | 1   | -   | 2             | 0   | 166 | 0   | 17  | 0   | 0   |
| CDC42        | 22392722 | 1   | +   | 1             | 0   | 1   | 0   | 0   | 0   | 0   |
| CDC42        | 22398241 | 1   | -   | 1             | 0   | 1   | 0   | 0   | 0   | 0   |
| CDC42        | 22414303 | 1   | +   | 1             | 0   | 22  | 0   | 0   | 0   | 0   |
| KDM1A        | 23372205 | 1   | +   | 1             | 0   | 0   | 2   | 0   | 0   | 0   |
| KDM1A        | 23381841 | 1   | +   | 1             | 0   | 0   | 142 | 0   | 0   | 0   |
| CLIC4        | 25116269 | 1   | -   | 1             | 0   | 0   | 0   | 0   | 0   | 3   |
| TMEM50A      | 25681080 | 1   | +   | 1             | 0   | 0   | 0   | 0   | 7   | 0   |
| PAFAH2       | 26276090 | 1   | +   | 2             | 0   | 0   | 0   | 25  | 5   | 0   |
| CEP85        | 26582365 | 1   | -   | 3             | 0   | 0   | 0   | 29  | 3   | 3   |
| UBXN11       | 26618458 | 1   | +   | 1             | 7   | 0   | 0   | 0   | 0   | 0   |
| ARID1A       | 27043874 | 1   | +   | 1             | 0   | 0   | 14  | 0   | 0   | 0   |
| ZDHHC18      | 27149387 | 1   | +   | 2             | 0   | 0   | 0   | 5   | 0   | 1   |
| WDTC1        | 27586951 | 1   | -   | 1             | 0   | 2   | 0   | 0   | 0   | 0   |
| WDTC1        | 27597990 | 1   | +   | 3             | 0   | 0   | 0   | 9   | 4   | 12  |
| WDTC1        | 27604583 | 1   | -   | 1             | 0   | 0   | 0   | 0   | 1   | 0   |
| EYA3         | 28360620 | 1   | +   | 1             | 0   | 1   | 0   | 0   | 0   | 0   |
| EYA3         | 28363457 | 1   | -   | 1             | 0   | 0   | 0   | 1   | 0   | 0   |
| EYA3         | 28397592 | 1   | -   | 1             | 0   | 0   | 0   | 9   | 0   | 0   |
| DNAJC8       | 28539162 | 1   | +   | 1             | 1   | 0   | 0   | 0   | 0   | 0   |
| PHACTR4      | 28752654 | 1   | +   | 1             | 0   | 0   | 3   | 0   | 0   | 0   |
| PHACTR4      | 28781506 | 1   | +   | 1             | 0   | 0   | 18  | 0   | 0   | 0   |
| EPB41        | 29248220 | 1   | +   | 1             | 0   | 0   | 0   | 12  | 0   | 0   |
| PUM1         | 31464218 | 1   | +   | 2             | 25  | 0   | 9   | 0   | 0   | 0   |
| PTP4A2       | 32382120 | 1   | -   | 1             | 0   | 0   | 0   | 4   | 0   | 0   |
| PTP4A2       | 32390853 | 1   | +   | 1             | 0   | 0   | 0   | 18  | 0   | 0   |
| HDAC1        | 32764554 | 1   | -   | 1             | 0   | 0   | 1   | 0   | 0   | 0   |
| ZBTB8A       | 33052637 | 1   | -   | 1             | 0   | 0   | 0   | 0   | 0   | 14  |
| PHC2         | 33877292 | 1   | +   | 1             | 0   | 0   | 0   | 53  | 0   | 0   |
| LOC100506144 | 35424009 | 1   | -   | 1             | 0   | 0   | 0   | 6   | 0   | 0   |
| ZMYM6        | 35482084 | 1   | -   | 1             | 0   | 28  | 0   | 0   | 0   | 0   |

Supplementary Table 1: IS tracking over time

| Gene     | IS Locus  | Chr | Ori | N Times Found | M6  | M9 | M12 | M17 | M21 | M24 |
|----------|-----------|-----|-----|---------------|-----|----|-----|-----|-----|-----|
| ZMYM4    | 35742641  | 1   | +   | 1             | 0   | 0  | 1   | 0   | 0   | 0   |
| ZMYM4    | 35862110  | 1   | +   | 1             | 0   | 0  | 0   | 0   | 0   | 1   |
| PSMB2    | 36090893  | 1   | +   | 1             | 0   | 0  | 3   | 0   | 0   | 0   |
| EIF2C3   | 36407454  | 1   | +   | 1             | 3   | 0  | 0   | 0   | 0   | 0   |
| EIF2C3   | 36445083  | 1   | -   | 1             | 0   | 12 | 0   | 0   | 0   | 0   |
| EIF2C3   | 36448154  | 1   | -   | 1             | 0   | 0  | 0   | 27  | 0   | 0   |
| MACF1    | 39813545  | 1   | +   | 1             | 0   | 0  | 0   | 0   | 0   | 11  |
| MACF1    | 39891134  | 1   | -   | 1             | 7   | 0  | 0   | 0   | 0   | 0   |
| SCMH1    | 41586260  | 1   | +   | 1             | 1   | 0  | 0   | 0   | 0   | 0   |
| HIVEP3   | 42377773  | 1   | -   | 1             | 0   | 0  | 0   | 6   | 0   | 0   |
| YBX1     | 43151405  | 1   | -   | 1             | 0   | 0  | 0   | 58  | 0   | 0   |
| ZNF691   | 43333662  | 1   | +   | 1             | 13  | 0  | 0   | 0   | 0   | 0   |
| TIE1     | 43789585  | 1   | -   | 1             | 0   | 0  | 0   | 7   | 0   | 0   |
| C1orf84  | 43874288  | 1   | +   | 1             | 0   | 0  | 0   | 0   | 0   | 8   |
| ST3GAL3  | 44209921  | 1   | +   | 1             | 0   | 0  | 0   | 6   | 0   | 0   |
| TESK2    | 45917962  | 1   | -   | 1             | 0   | 0  | 2   | 0   | 0   | 0   |
| MAST2    | 46343832  | 1   | -   | 1             | 0   | 0  | 0   | 0   | 0   | 14  |
| ZCCHC11  | 52988644  | 1   | +   | 1             | 0   | 0  | 0   | 1   | 0   | 0   |
| USP24    | 55667842  | 1   | -   | 1             | 0   | 0  | 15  | 0   | 0   | 0   |
| HOOK1    | 60312927  | 1   | -   | 3             | 193 | 0  | 0   | 5   | 1   | 0   |
| NFIA     | 61698546  | 1   | +   | 1             | 0   | 0  | 3   | 0   | 0   | 0   |
| DOCK7    | 62962194  | 1   | +   | 1             | 0   | 1  | 0   | 0   | 0   | 0   |
| ALG6     | 63878032  | 1   | -   | 1             | 0   | 0  | 0   | 0   | 0   | 2   |
| NEGR1    | 72651322  | 1   | -   | 1             | 0   | 0  | 0   | 24  | 0   | 0   |
| ASB17    | 76467803  | 1   | +   | 1             | 0   | 1  | 0   | 0   | 0   | 0   |
| ZZZ3     | 78047148  | 1   | +   | 1             | 0   | 1  | 0   | 0   | 0   | 0   |
| LPHN2    | 81349526  | 1   | -   | 1             | 0   | 0  | 81  | 0   | 0   | 0   |
| ODF2L    | 86776132  | 1   | -   | 2             | 3   | 5  | 0   | 0   | 0   | 0   |
| DPYD     | 98291787  | 1   | +   | 2             | 0   | 0  | 0   | 2   | 2   | 0   |
| CDC14A   | 100827721 | 1   | -   | 1             | 0   | 2  | 0   | 0   | 0   | 0   |
| RNPC3    | 104077444 | 1   | -   | 2             | 0   | 0  | 72  | 0   | 1   | 0   |
| AMY1C    | 104621207 | 1   | -   | 1             | 0   | 1  | 0   | 0   | 0   | 0   |
| GSTM5    | 110260977 | 1   | -   | 2             | 0   | 0  | 0   | 0   | 12  | 11  |
| RBM15    | 110894936 | 1   | +   | 1             | 0   | 0  | 1   | 0   | 0   | 0   |
| DENND2D  | 111750402 | 1   | -   | 1             | 0   | 0  | 0   | 4   | 0   | 0   |
| ADORA3   | 112097524 | 1   | -   | 1             | 0   | 2  | 0   | 0   | 0   | 0   |
| FCGR1B   | 121484829 | 1   | -   | 1             | 0   | 0  | 0   | 5   | 0   | 0   |
| PDE4DIP  | 144912662 | 1   | +   | 1             | 0   | 3  | 0   | 0   | 0   | 0   |
| PDE4DIP  | 144929202 | 1   | +   | 2             | 173 | 3  | 0   | 0   | 0   | 0   |
| NOTCH2NL | 145263252 | 1   | -   | 1             | 0   | 1  | 0   | 0   | 0   | 0   |
| NOTCH2NL | 145272448 | 1   | -   | 1             | 0   | 0  | 0   | 8   | 0   | 0   |
| CHD1L    | 146731607 | 1   | -   | 1             | 0   | 0  | 1   | 0   | 0   | 0   |
| VPS45    | 150098708 | 1   | -   | 1             | 0   | 0  | 0   | 0   | 0   | 2   |
| MCL1     | 150546593 | 1   | +   | 1             | 0   | 0  | 0   | 1   | 0   | 0   |
| GOLPH3L  | 150665714 | 1   | -   | 1             | 0   | 0  | 0   | 0   | 0   | 14  |
| HORMAD1  | 150687853 | 1   | +   | 3             | 0   | 3  | 1   | 13  | 0   | 0   |
| SETDB1   | 150916790 | 1   | -   | 1             | 0   | 10 | 0   | 0   | 0   | 0   |
| SEMA6C   | 151115881 | 1   | +   | 1             | 0   | 0  | 0   | 4   | 0   | 0   |
| POGZ     | 151389502 | 1   | -   | 1             | 0   | 0  | 0   | 0   | 0   | 9   |

Supplementary Table 1: IS tracking over time

| Gene     | IS Locus  | Chr | Ori | N Times Found | M6  | M9 | M12 | M17 | M21 | M24 |
|----------|-----------|-----|-----|---------------|-----|----|-----|-----|-----|-----|
| S100A10  | 151926748 | 1   | +   | 1             | 0   | 0  | 0   | 4   | 0   | 0   |
| GATAD2B  | 153842178 | 1   | +   | 1             | 0   | 0  | 9   | 0   | 0   | 0   |
| C1orf43  | 154189331 | 1   | +   | 1             | 0   | 0  | 0   | 9   | 0   | 0   |
| UBAP2L   | 154196702 | 1   | +   | 1             | 0   | 0  | 0   | 2   | 0   | 0   |
| UBAP2L   | 154237004 | 1   | -   | 2             | 5   | 0  | 0   | 0   | 0   | 17  |
| TDRD10   | 154498883 | 1   | +   | 1             | 0   | 4  | 0   | 0   | 0   | 0   |
| ADAR     | 154589988 | 1   | +   | 1             | 0   | 0  | 61  | 0   | 0   | 0   |
| PMVK     | 154876709 | 1   | -   | 1             | 0   | 0  | 7   | 0   | 0   | 0   |
| KRTCAP2  | 155128997 | 1   | +   | 1             | 5   | 0  | 0   | 0   | 0   | 0   |
| ASH1L    | 155371376 | 1   | +   | 1             | 20  | 0  | 0   | 0   | 0   | 0   |
| ASH1L    | 155413049 | 1   | +   | 1             | 0   | 0  | 0   | 1   | 0   | 0   |
| ASH1L    | 155428543 | 1   | -   | 1             | 0   | 0  | 1   | 0   | 0   | 0   |
| ASH1L    | 155433995 | 1   | +   | 1             | 0   | 0  | 2   | 0   | 0   | 0   |
| ASH1L    | 155434682 | 1   | -   | 1             | 93  | 0  | 0   | 0   | 0   | 0   |
| ASH1L    | 155435176 | 1   | +   | 1             | 0   | 0  | 0   | 0   | 0   | 1   |
| ASH1L    | 155480794 | 1   | +   | 1             | 0   | 0  | 0   | 4   | 0   | 0   |
| YY1AP1   | 155633623 | 1   | -   | 1             | 0   | 0  | 1   | 0   | 0   | 0   |
| GON4L    | 155770502 | 1   | +   | 1             | 0   | 0  | 0   | 11  | 0   | 0   |
| GON4L    | 155778050 | 1   | +   | 1             | 0   | 0  | 0   | 0   | 0   | 10  |
| ARHGEF11 | 156979185 | 1   | +   | 1             | 0   | 1  | 0   | 0   | 0   | 0   |
| FCRL2    | 157701404 | 1   | -   | 2             | 0   | 0  | 92  | 0   | 1   | 0   |
| DCAF8    | 160205183 | 1   | -   | 1             | 0   | 0  | 0   | 0   | 2   | 0   |
| COPA     | 160288565 | 1   | -   | 1             | 1   | 0  | 0   | 0   | 0   | 0   |
| DEDD     | 161097598 | 1   | -   | 1             | 0   | 0  | 2   | 0   | 0   | 0   |
| PBX1     | 164542712 | 1   | +   | 1             | 0   | 0  | 0   | 1   | 0   | 0   |
| PBX1     | 164797466 | 1   | -   | 1             | 0   | 0  | 3   | 0   | 0   | 0   |
| POU2F1   | 167245220 | 1   | -   | 2             | 3   | 0  | 9   | 0   | 0   | 0   |
| POU2F1   | 167255993 | 1   | -   | 1             | 0   | 0  | 0   | 144 | 0   | 0   |
| NME7     | 169283807 | 1   | -   | 3             | 3   | 2  | 0   | 1   | 0   | 0   |
| SCYL3    | 169839104 | 1   | +   | 1             | 8   | 0  | 0   | 0   | 0   | 0   |
| DNM3     | 171814436 | 1   | -   | 1             | 0   | 0  | 0   | 8   | 0   | 0   |
| TNFSF18  | 173041261 | 1   | +   | 1             | 0   | 0  | 0   | 3   | 0   | 0   |
| RABGAP1L | 174918415 | 1   | +   | 1             | 0   | 0  | 0   | 27  | 0   | 0   |
| RFWD2    | 176118794 | 1   | -   | 1             | 0   | 0  | 0   | 2   | 0   | 0   |
| ABL2     | 179081169 | 1   | +   | 1             | 4   | 0  | 0   | 0   | 0   | 0   |
| SMG7     | 183479651 | 1   | +   | 1             | 0   | 0  | 0   | 13  | 0   | 0   |
| PLA2G4A  | 187870503 | 1   | +   | 2             | 0   | 0  | 0   | 1   | 0   | 7   |
| PLA2G4A  | 188294300 | 1   | +   | 1             | 0   | 0  | 0   | 24  | 0   | 0   |
| RGS18    | 191885208 | 1   | +   | 1             | 24  | 0  | 0   | 0   | 0   | 0   |
| KCNT2    | 196375455 | 1   | -   | 1             | 0   | 0  | 0   | 0   | 13  | 0   |
| CFH      | 196613424 | 1   | +   | 2             | 0   | 1  | 0   | 1   | 0   | 0   |
| ZNF281   | 200325227 | 1   | -   | 2             | 0   | 0  | 0   | 14  | 56  | 0   |
| DDX59    | 200650112 | 1   | -   | 1             | 0   | 0  | 21  | 0   | 0   | 0   |
| ADIPOR1  | 202910326 | 1   | -   | 1             | 22  | 0  | 0   | 0   | 0   | 0   |
| PPP1R15B | 204370211 | 1   | -   | 1             | 0   | 3  | 0   | 0   | 0   | 0   |
| RBBP5    | 205085423 | 1   | +   | 1             | 3   | 0  | 0   | 0   | 0   | 0   |
| AVPR1B   | 206221234 | 1   | +   | 1             | 0   | 0  | 0   | 1   | 0   | 0   |
| C1orf186 | 206252441 | 1   | +   | 1             | 0   | 1  | 0   | 0   | 0   | 0   |
| CD55     | 207511836 | 1   | -   | 1             | 180 | 0  | 0   | 0   | 0   | 0   |

Supplementary Table 1: IS tracking over time

| Gene     | IS Locus  | Chr | Ori | N Times Found | M6 | M9 | M12 | M17 | M21 | M24 |
|----------|-----------|-----|-----|---------------|----|----|-----|-----|-----|-----|
| CR1      | 207777011 | 1   | +   | 1             | 0  | 0  | 4   | 0   | 0   | 0   |
| CD46     | 207937828 | 1   | -   | 1             | 0  | 0  | 0   | 1   | 0   | 0   |
| CD46     | 207939283 | 1   | +   | 1             | 0  | 0  | 0   | 0   | 0   | 2   |
| CD46     | 207963852 | 1   | +   | 1             | 0  | 0  | 0   | 7   | 0   | 0   |
| HHAT     | 210531184 | 1   | -   | 1             | 0  | 5  | 0   | 0   | 0   | 0   |
| RCOR3    | 211408208 | 1   | -   | 2             | 0  | 0  | 0   | 17  | 0   | 8   |
| RCOR3    | 211450701 | 1   | -   | 1             | 0  | 0  | 3   | 0   | 0   | 0   |
| LYPLAL1  | 219382100 | 1   | +   | 3             | 0  | 3  | 0   | 4   | 0   | 12  |
| RAB3GAP2 | 220395190 | 1   | +   | 1             | 0  | 3  | 0   | 0   | 0   | 0   |
| CDC42BPA | 227206112 | 1   | -   | 1             | 0  | 0  | 189 | 0   | 0   | 0   |
| CDC42BPA | 227341699 | 1   | +   | 1             | 0  | 3  | 0   | 0   | 0   | 0   |
| CDC42BPA | 227494250 | 1   | -   | 1             | 0  | 0  | 0   | 6   | 0   | 0   |
| SPHAR    | 229441944 | 1   | +   | 1             | 0  | 0  | 0   | 8   | 0   | 0   |
| NUP133   | 229625216 | 1   | -   | 1             | 0  | 0  | 0   | 0   | 0   | 1   |
| GNPAT    | 231398061 | 1   | +   | 1             | 0  | 0  | 0   | 11  | 0   | 0   |
| DISC1    | 231908084 | 1   | +   | 1             | 0  | 0  | 0   | 7   | 0   | 0   |
| TARBP1   | 234586165 | 1   | +   | 1             | 0  | 0  | 0   | 0   | 0   | 7   |
| ARID4B   | 235364517 | 1   | -   | 1             | 0  | 0  | 2   | 0   | 0   | 0   |
| ARID4B   | 235367917 | 1   | +   | 1             | 0  | 0  | 0   | 27  | 0   | 0   |
| CHRM3    | 239338494 | 1   | +   | 1             | 0  | 0  | 0   | 107 | 0   | 0   |
| KMO      | 241735253 | 1   | -   | 1             | 0  | 0  | 0   | 0   | 11  | 0   |
| ADSS     | 244586939 | 1   | -   | 1             | 0  | 0  | 0   | 0   | 4   | 0   |
| ZNF670   | 247211007 | 1   | -   | 1             | 0  | 0  | 0   | 4   | 0   | 0   |
| OR2T8    | 248081691 | 1   | -   | 1             | 0  | 0  | 0   | 0   | 19  | 0   |
| OR2L13   | 248164662 | 1   | -   | 1             | 0  | 0  | 0   | 0   | 0   | 3   |
| CMPK2    | 6940862   | 2   | -   | 1             | 0  | 0  | 15  | 0   | 0   | 0   |
| ID2      | 8034201   | 2   | -   | 1             | 0  | 0  | 2   | 0   | 0   | 0   |
| NOL10    | 10759582  | 2   | -   | 1             | 0  | 0  | 0   | 3   | 0   | 0   |
| ROCK2    | 11417967  | 2   | +   | 2             | 0  | 0  | 0   | 0   | 2   | 4   |
| TRIB2    | 13537287  | 2   | -   | 1             | 0  | 2  | 0   | 0   | 0   | 0   |
| FAM49A   | 16481757  | 2   | -   | 1             | 0  | 0  | 0   | 15  | 0   | 0   |
| ATAD2B   | 24021277  | 2   | -   | 1             | 0  | 0  | 3   | 0   | 0   | 0   |
| NCOA1    | 24895152  | 2   | +   | 1             | 0  | 0  | 0   | 0   | 0   | 1   |
| DTNB     | 25670405  | 2   | +   | 1             | 0  | 0  | 0   | 0   | 32  | 0   |
| ASXL2    | 25983321  | 2   | -   | 1             | 0  | 1  | 0   | 0   | 0   | 0   |
| RAB10    | 26342269  | 2   | -   | 1             | 0  | 0  | 0   | 0   | 0   | 1   |
| BRE      | 28199648  | 2   | -   | 1             | 6  | 0  | 0   | 0   | 0   | 0   |
| BRE      | 28232062  | 2   | -   | 1             | 0  | 1  | 0   | 0   | 0   | 0   |
| BRE      | 28254606  | 2   | +   | 2             | 0  | 2  | 0   | 4   | 0   | 0   |
| PLB1     | 28857685  | 2   | +   | 1             | 0  | 0  | 1   | 0   | 0   | 0   |
| CLIP4    | 29408263  | 2   | +   | 1             | 0  | 0  | 0   | 65  | 0   | 0   |
| MEMO1    | 32142785  | 2   | -   | 1             | 66 | 0  | 0   | 0   | 0   | 0   |
| SPAST    | 32360815  | 2   | +   | 1             | 0  | 1  | 0   | 0   | 0   | 0   |
| SLC30A6  | 32430894  | 2   | -   | 1             | 0  | 0  | 0   | 0   | 5   | 0   |
| RASGRP3  | 33730406  | 2   | +   | 1             | 0  | 0  | 0   | 21  | 0   | 0   |
| CRIM1    | 36611644  | 2   | +   | 1             | 0  | 0  | 0   | 0   | 0   | 2   |
| MAP4K3   | 39491491  | 2   | -   | 1             | 0  | 0  | 11  | 0   | 0   | 0   |
| MAP4K3   | 39554207  | 2   | +   | 1             | 0  | 0  | 0   | 0   | 0   | 2   |
| MAP4K3   | 39555690  | 2   | -   | 1             | 0  | 0  | 0   | 12  | 0   | 0   |

Supplementary Table 1: IS tracking over time

| Gene    | IS Locus  | Chr | Ori | N Times Found | M6  | M9  | M12 | M17 | M21 | M24 |
|---------|-----------|-----|-----|---------------|-----|-----|-----|-----|-----|-----|
| SLC8A1  | 41241159  | 2   | -   | 1             | 0   | 0   | 2   | 0   | 0   | 0   |
| MTA3    | 42806305  | 2   | -   | 1             | 0   | 0   | 4   | 0   | 0   | 0   |
| HAAO    | 43118328  | 2   | +   | 1             | 0   | 0   | 40  | 0   | 0   | 0   |
| THADA   | 43725495  | 2   | +   | 1             | 0   | 0   | 0   | 0   | 0   | 3   |
| THADA   | 43755793  | 2   | +   | 1             | 0   | 0   | 0   | 0   | 19  | 0   |
| THADA   | 43816637  | 2   | -   | 1             | 0   | 0   | 8   | 0   | 0   | 0   |
| SRBD1   | 45700595  | 2   | +   | 1             | 0   | 0   | 2   | 0   | 0   | 0   |
| SOCS5   | 46955681  | 2   | -   | 1             | 0   | 0   | 0   | 2   | 0   | 0   |
| FBXO11  | 48125268  | 2   | +   | 1             | 0   | 0   | 0   | 1   | 0   | 0   |
| NRXN1   | 50118655  | 2   | -   | 1             | 0   | 0   | 0   | 0   | 0   | 1   |
| NRXN1   | 50704528  | 2   | -   | 3             | 0   | 204 | 2   | 0   | 63  | 0   |
| ASB3    | 52653567  | 2   | -   | 1             | 339 | 0   | 0   | 0   | 0   | 0   |
| FANCL   | 58849492  | 2   | -   | 1             | 0   | 0   | 0   | 6   | 0   | 0   |
| FANCL   | 58870062  | 2   | -   | 1             | 0   | 29  | 0   | 0   | 0   | 0   |
| FANCL   | 59116375  | 2   | +   | 1             | 0   | 0   | 0   | 1   | 0   | 0   |
| FANCL   | 59277933  | 2   | -   | 1             | 0   | 0   | 0   | 10  | 0   | 0   |
| EHBP1   | 62947576  | 2   | -   | 1             | 0   | 0   | 0   | 0   | 3   | 0   |
| EHBP1   | 63098480  | 2   | +   | 1             | 0   | 0   | 0   | 0   | 0   | 1   |
| EHBP1   | 63214921  | 2   | +   | 1             | 0   | 0   | 0   | 13  | 0   | 0   |
| WDPCP   | 63548541  | 2   | +   | 1             | 0   | 0   | 0   | 0   | 0   | 1   |
| WDPCP   | 63808402  | 2   | -   | 2             | 0   | 0   | 16  | 0   | 0   | 5   |
| MEIS1   | 66906898  | 2   | -   | 1             | 0   | 0   | 0   | 0   | 0   | 1   |
| MEIS1   | 66990269  | 2   | +   | 1             | 0   | 0   | 0   | 6   | 0   | 0   |
| APLF    | 68777630  | 2   | +   | 1             | 0   | 0   | 8   | 0   | 0   | 0   |
| GMCL1   | 70091359  | 2   | -   | 1             | 0   | 1   | 0   | 0   | 0   | 0   |
| DGUOK   | 74170107  | 2   | -   | 1             | 0   | 0   | 9   | 0   | 0   | 0   |
| CTNNA2  | 82573115  | 2   | +   | 1             | 0   | 0   | 0   | 0   | 0   | 1   |
| STARD7  | 96858630  | 2   | +   | 1             | 0   | 0   | 0   | 0   | 2   | 0   |
| IL1R1   | 102776040 | 2   | -   | 1             | 0   | 0   | 3   | 0   | 0   | 0   |
| POU3F3  | 104562185 | 2   | -   | 1             | 0   | 1   | 0   | 0   | 0   | 0   |
| MRPS9   | 105687799 | 2   | +   | 1             | 0   | 0   | 0   | 13  | 0   | 0   |
| MRPS9   | 105692970 | 2   | +   | 1             | 0   | 1   | 0   | 0   | 0   | 0   |
| SULT1C4 | 109003724 | 2   | -   | 1             | 0   | 0   | 11  | 0   | 0   | 0   |
| BCL2L11 | 112043361 | 2   | -   | 1             | 0   | 0   | 0   | 0   | 0   | 2   |
| TMEM87B | 112858177 | 2   | -   | 2             | 0   | 12  | 0   | 1   | 0   | 0   |
| DDX18   | 118586899 | 2   | +   | 1             | 0   | 0   | 0   | 5   | 0   | 0   |
| INSIG2  | 118866548 | 2   | +   | 1             | 0   | 0   | 0   | 0   | 128 | 0   |
| CNTNAP5 | 123867178 | 2   | +   | 1             | 0   | 0   | 0   | 0   | 1   | 0   |
| CNTNAP5 | 124029896 | 2   | -   | 1             | 0   | 0   | 0   | 6   | 0   | 0   |
| CNTNAP5 | 124046372 | 2   | +   | 1             | 0   | 2   | 0   | 0   | 0   | 0   |
| GYPC    | 127225792 | 2   | +   | 1             | 0   | 0   | 0   | 1   | 0   | 0   |
| GYPC    | 127540451 | 2   | -   | 1             | 0   | 0   | 0   | 0   | 0   | 2   |
| UGGT1   | 128924213 | 2   | -   | 1             | 78  | 0   | 0   | 0   | 0   | 0   |
| GPR39   | 133001627 | 2   | -   | 1             | 0   | 0   | 0   | 5   | 0   | 0   |
| GRB14   | 165324035 | 2   | -   | 1             | 0   | 0   | 14  | 0   | 0   | 0   |
| XIRP2   | 168033866 | 2   | +   | 1             | 0   | 0   | 0   | 0   | 4   | 0   |
| TLK1    | 171906552 | 2   | -   | 1             | 0   | 5   | 0   | 0   | 0   | 0   |
| DCAF17  | 172331671 | 2   | -   | 1             | 0   | 0   | 0   | 0   | 0   | 3   |
| OLA1    | 175040981 | 2   | +   | 1             | 0   | 1   | 0   | 0   | 0   | 0   |



Supplementary Table 1: IS tracking over time

| Gene     | IS Locus  | Chr | Ori | N Times Found | M6 | M9 | M12 | M17 | M21 | M24 |
|----------|-----------|-----|-----|---------------|----|----|-----|-----|-----|-----|
| ZNF804A  | 185586816 | 2   | +   | 1             | 0  | 29 | 0   | 0   | 0   | 0   |
| TMEFF2   | 194106533 | 2   | -   | 1             | 0  | 2  | 0   | 0   | 0   | 0   |
| DNAH7    | 196704960 | 2   | +   | 1             | 0  | 0  | 0   | 3   | 0   | 0   |
| TRAK2    | 202302088 | 2   | -   | 1             | 0  | 0  | 2   | 0   | 0   | 0   |
| PARD3B   | 206012675 | 2   | +   | 1             | 0  | 0  | 0   | 0   | 0   | 1   |
| BARD1    | 215667422 | 2   | -   | 1             | 0  | 13 | 0   | 0   | 0   | 0   |
| SMARCAL1 | 217305690 | 2   | -   | 1             | 0  | 0  | 7   | 0   | 0   | 0   |
| EPHA4    | 222387732 | 2   | +   | 1             | 0  | 0  | 0   | 0   | 4   | 0   |
| FARSB    | 223506359 | 2   | -   | 1             | 0  | 2  | 0   | 0   | 0   | 0   |
| SPHKAP   | 229308806 | 2   | +   | 1             | 1  | 0  | 0   | 0   | 0   | 0   |
| SP140L   | 231201272 | 2   | -   | 2             | 0  | 2  | 0   | 4   | 0   | 0   |
| SP100    | 231296174 | 2   | -   | 3             | 0  | 7  | 0   | 7   | 0   | 4   |
| PSMD1    | 232013574 | 2   | +   | 1             | 0  | 2  | 0   | 0   | 0   | 0   |
| PDE6D    | 232637652 | 2   | +   | 1             | 0  | 0  | 0   | 25  | 0   | 0   |
| DIS3L2   | 232858705 | 2   | -   | 1             | 0  | 0  | 0   | 15  | 0   | 0   |
| LRRFIP1  | 238666558 | 2   | -   | 1             | 0  | 0  | 31  | 0   | 0   | 0   |
| RAMP1    | 238842068 | 2   | +   | 2             | 0  | 5  | 0   | 0   | 0   | 1   |
| FARP2    | 242308085 | 2   | +   | 1             | 0  | 0  | 0   | 0   | 8   | 0   |
| SETD5    | 9491593   | 3   | +   | 1             | 0  | 0  | 0   | 0   | 0   | 1   |
| VGLL4    | 11749543  | 3   | -   | 1             | 0  | 5  | 0   | 0   | 0   | 0   |
| NUP210   | 13421205  | 3   | +   | 1             | 0  | 0  | 13  | 0   | 0   | 0   |
| FGD5     | 14973528  | 3   | +   | 1             | 0  | 1  | 0   | 0   | 0   | 0   |
| ANKRD28  | 15823074  | 3   | -   | 2             | 0  | 0  | 0   | 3   | 0   | 2   |
| ANKRD28  | 15871198  | 3   | -   | 1             | 0  | 14 | 0   | 0   | 0   | 0   |
| PLCL2    | 16986715  | 3   | -   | 1             | 0  | 10 | 0   | 0   | 0   | 0   |
| TBC1D5   | 17539196  | 3   | +   | 1             | 0  | 1  | 0   | 0   | 0   | 0   |
| KCNH8    | 19498164  | 3   | +   | 1             | 0  | 3  | 0   | 0   | 0   | 0   |
| ZNF385D  | 22275063  | 3   | +   | 1             | 0  | 0  | 0   | 8   | 0   | 0   |
| THRB     | 24479655  | 3   | -   | 1             | 0  | 10 | 0   | 0   | 0   | 0   |
| RBMS3    | 29957780  | 3   | -   | 1             | 0  | 0  | 0   | 0   | 0   | 1   |
| STT3B    | 31656399  | 3   | +   | 1             | 5  | 0  | 0   | 0   | 0   | 0   |
| STAC     | 36112825  | 3   | -   | 1             | 0  | 0  | 0   | 0   | 2   | 0   |
| NKTR     | 42658909  | 3   | -   | 1             | 0  | 0  | 0   | 2   | 0   | 0   |
| NKTR     | 42667944  | 3   | -   | 2             | 0  | 0  | 0   | 11  | 1   | 0   |
| SNRK     | 43354262  | 3   | -   | 1             | 6  | 0  | 0   | 0   | 0   | 0   |
| ANO10    | 43591386  | 3   | -   | 1             | 0  | 0  | 0   | 1   | 0   | 0   |
| C3orf23  | 44398785  | 3   | +   | 1             | 0  | 0  | 1   | 0   | 0   | 0   |
| CCDC12   | 46980209  | 3   | +   | 1             | 0  | 0  | 0   | 34  | 0   | 0   |
| SETD2    | 47111781  | 3   | +   | 1             | 0  | 0  | 0   | 212 | 0   | 0   |
| SETD2    | 47154445  | 3   | -   | 1             | 0  | 0  | 7   | 0   | 0   | 0   |
| SETD2    | 47157479  | 3   | +   | 1             | 0  | 0  | 0   | 79  | 0   | 0   |
| SMARCC1  | 47666501  | 3   | -   | 1             | 0  | 0  | 1   | 0   | 0   | 0   |
| SMARCC1  | 47681884  | 3   | +   | 1             | 0  | 0  | 0   | 0   | 0   | 2   |
| SMARCC1  | 47702342  | 3   | -   | 1             | 0  | 0  | 0   | 0   | 23  | 0   |
| SMARCC1  | 47727221  | 3   | -   | 1             | 15 | 0  | 0   | 0   | 0   | 0   |
| CDC25A   | 48219520  | 3   | -   | 2             | 0  | 0  | 0   | 9   | 4   | 0   |
| ARIH2    | 48994376  | 3   | -   | 1             | 0  | 0  | 0   | 0   | 23  | 0   |
| QRICH1   | 49101045  | 3   | -   | 1             | 0  | 7  | 0   | 0   | 0   | 0   |
| QRICH1   | 49118242  | 3   | +   | 1             | 0  | 0  | 0   | 4   | 0   | 0   |

Supplementary Table 1: IS tracking over time

| Gene    | IS Locus  | Chr | Ori | N Times Found | M6  | M9 | M12 | M17 | M21 | M24 |
|---------|-----------|-----|-----|---------------|-----|----|-----|-----|-----|-----|
| USP4    | 49354001  | 3   | -   | 2             | 0   | 0  | 0   | 33  | 8   | 0   |
| USP4    | 49365523  | 3   | -   | 2             | 0   | 0  | 0   | 32  | 3   | 0   |
| IP6K1   | 49789423  | 3   | +   | 1             | 0   | 0  | 0   | 3   | 0   | 0   |
| IP6K1   | 49812517  | 3   | -   | 1             | 0   | 1  | 0   | 0   | 0   | 0   |
| RBM6    | 49978416  | 3   | +   | 1             | 0   | 0  | 0   | 9   | 0   | 0   |
| RBM6    | 49982667  | 3   | +   | 1             | 0   | 0  | 3   | 0   | 0   | 0   |
| RBM6    | 50076095  | 3   | -   | 1             | 0   | 0  | 0   | 10  | 0   | 0   |
| RBM6    | 50079856  | 3   | -   | 1             | 0   | 0  | 0   | 0   | 3   | 0   |
| RBM5    | 50131910  | 3   | -   | 1             | 0   | 0  | 0   | 0   | 0   | 1   |
| DOCK3   | 50816355  | 3   | -   | 1             | 0   | 0  | 0   | 0   | 2   | 0   |
| DOCK3   | 50994746  | 3   | +   | 1             | 6   | 0  | 0   | 0   | 0   | 0   |
| DOCK3   | 51088948  | 3   | -   | 1             | 0   | 1  | 0   | 0   | 0   | 0   |
| VPRBP   | 51483503  | 3   | +   | 1             | 0   | 2  | 0   | 0   | 0   | 0   |
| IQCF6   | 51829232  | 3   | +   | 1             | 0   | 1  | 0   | 0   | 0   | 0   |
| POC1A   | 52133135  | 3   | -   | 1             | 0   | 0  | 0   | 0   | 2   | 0   |
| PBRM1   | 52641244  | 3   | +   | 1             | 0   | 0  | 0   | 4   | 0   | 0   |
| PBRM1   | 52660927  | 3   | +   | 1             | 0   | 6  | 0   | 0   | 0   | 0   |
| ARHGEF3 | 56936656  | 3   | +   | 3             | 130 | 0  | 0   | 5   | 1   | 0   |
| ASB14   | 57309775  | 3   | +   | 1             | 0   | 0  | 0   | 0   | 0   | 10  |
| FOXP1   | 71603288  | 3   | -   | 1             | 0   | 0  | 2   | 0   | 0   | 0   |
| CNTN3   | 74416560  | 3   | +   | 1             | 6   | 0  | 0   | 0   | 0   | 0   |
| GBE1    | 80749458  | 3   | +   | 1             | 0   | 0  | 0   | 37  | 0   | 0   |
| GBE1    | 81696908  | 3   | +   | 1             | 0   | 0  | 0   | 15  | 0   | 0   |
| GBE1    | 83296448  | 3   | -   | 1             | 0   | 0  | 1   | 0   | 0   | 0   |
| HTR1F   | 87871007  | 3   | -   | 1             | 0   | 0  | 9   | 0   | 0   | 0   |
| NSUN3   | 94120434  | 3   | +   | 1             | 0   | 0  | 0   | 24  | 0   | 0   |
| NSUN3   | 94184957  | 3   | -   | 1             | 0   | 0  | 0   | 0   | 139 | 0   |
| DCBLD2  | 98520065  | 3   | +   | 1             | 0   | 0  | 0   | 0   | 0   | 2   |
| C3orf26 | 99673131  | 3   | +   | 1             | 0   | 0  | 3   | 0   | 0   | 0   |
| ALCAM   | 104013156 | 3   | -   | 1             | 7   | 0  | 0   | 0   | 0   | 0   |
| CBLB    | 105441587 | 3   | -   | 1             | 0   | 1  | 0   | 0   | 0   | 0   |
| CBLB    | 105508314 | 3   | -   | 2             | 0   | 1  | 0   | 0   | 8   | 0   |
| CD47    | 107783644 | 3   | -   | 1             | 2   | 0  | 0   | 0   | 0   | 0   |
| PVRL3   | 110864626 | 3   | +   | 1             | 0   | 9  | 0   | 0   | 0   | 0   |
| PLCXD2  | 111416926 | 3   | -   | 1             | 0   | 0  | 0   | 5   | 0   | 0   |
| CCDC80  | 112339220 | 3   | +   | 1             | 0   | 0  | 0   | 11  | 0   | 0   |
| DIRC2   | 122523765 | 3   | +   | 1             | 0   | 0  | 0   | 0   | 0   | 2   |
| DIRC2   | 122563619 | 3   | +   | 1             | 0   | 0  | 0   | 3   | 0   | 0   |
| C3orf37 | 129015407 | 3   | +   | 1             | 206 | 0  | 0   | 0   | 0   | 0   |
| ATP2C1  | 130672362 | 3   | +   | 1             | 0   | 0  | 1   | 0   | 0   | 0   |
| TFDP2   | 141801671 | 3   | +   | 1             | 0   | 3  | 0   | 0   | 0   | 0   |
| PLOD2   | 145487913 | 3   | -   | 1             | 0   | 0  | 0   | 0   | 0   | 4   |
| PLOD2   | 145844050 | 3   | -   | 1             | 0   | 0  | 0   | 0   | 0   | 5   |
| PLOD2   | 145844059 | 3   | -   | 1             | 0   | 0  | 0   | 0   | 1   | 0   |
| TIPARP  | 156403438 | 3   | +   | 1             | 0   | 0  | 3   | 0   | 0   | 0   |
| OTOL1   | 162507348 | 3   | -   | 1             | 0   | 16 | 0   | 0   | 0   | 0   |
| SLITRK3 | 165094062 | 3   | -   | 2             | 0   | 0  | 57  | 0   | 129 | 0   |
| BCHE    | 165939104 | 3   | -   | 1             | 0   | 0  | 0   | 0   | 54  | 0   |
| GOLIM4  | 168277241 | 3   | +   | 1             | 0   | 0  | 0   | 5   | 0   | 0   |

Supplementary Table 1: IS tracking over time

| Gene     | IS Locus  | Chr | Ori | N Times Found | M6 | M9  | M12 | M17 | M21 | M24 |
|----------|-----------|-----|-----|---------------|----|-----|-----|-----|-----|-----|
| NLGN1    | 173338957 | 3   | -   | 1             | 0  | 5   | 0   | 0   | 0   | 0   |
| NLGN1    | 173479793 | 3   | +   | 1             | 0  | 0   | 0   | 12  | 0   | 0   |
| NAALADL2 | 174709902 | 3   | -   | 1             | 0  | 0   | 1   | 0   | 0   | 0   |
| NAALADL2 | 175052794 | 3   | -   | 1             | 0  | 0   | 25  | 0   | 0   | 0   |
| KCNMB2   | 178034344 | 3   | +   | 1             | 48 | 0   | 0   | 0   | 0   | 0   |
| PSMD2    | 184025924 | 3   | -   | 1             | 0  | 0   | 0   | 6   | 0   | 0   |
| VPS8     | 184693706 | 3   | -   | 1             | 0  | 0   | 0   | 0   | 0   | 3   |
| ETV5     | 185801303 | 3   | -   | 1             | 0  | 0   | 0   | 3   | 0   | 0   |
| LPP      | 187807870 | 3   | -   | 1             | 0  | 0   | 1   | 0   | 0   | 0   |
| TFRC     | 195842396 | 3   | +   | 1             | 0  | 6   | 0   | 0   | 0   | 0   |
| DLG1     | 196797461 | 3   | +   | 1             | 0  | 2   | 0   | 0   | 0   | 0   |
| DLG1     | 196809817 | 3   | +   | 1             | 0  | 2   | 0   | 0   | 0   | 0   |
| DLG1     | 196952719 | 3   | +   | 1             | 0  | 4   | 0   | 0   | 0   | 0   |
| FYTTD1   | 197503230 | 3   | +   | 1             | 0  | 0   | 0   | 0   | 0   | 1   |
| ZNF718   | 154910    | 4   | -   | 1             | 0  | 0   | 9   | 0   | 0   | 0   |
| PIGG     | 523443    | 4   | +   | 1             | 3  | 0   | 0   | 0   | 0   | 0   |
| HAUS3    | 2237782   | 4   | -   | 1             | 0  | 0   | 0   | 0   | 12  | 0   |
| FAM193A  | 2667741   | 4   | +   | 1             | 0  | 0   | 1   | 0   | 0   | 0   |
| HTT      | 3147397   | 4   | -   | 1             | 0  | 0   | 3   | 0   | 0   | 0   |
| RAB28    | 13470277  | 4   | +   | 1             | 0  | 0   | 0   | 1   | 0   | 0   |
| GBA3     | 22725620  | 4   | -   | 1             | 0  | 0   | 0   | 0   | 3   | 0   |
| KIAA1239 | 37131749  | 4   | -   | 1             | 0  | 0   | 0   | 8   | 0   | 0   |
| PDS5A    | 39917042  | 4   | +   | 1             | 0  | 0   | 0   | 0   | 14  | 0   |
| GRXCR1   | 43497623  | 4   | -   | 1             | 0  | 4   | 0   | 0   | 0   | 0   |
| GABRG1   | 45839732  | 4   | -   | 1             | 0  | 0   | 0   | 0   | 0   | 15  |
| FRYL     | 48646593  | 4   | -   | 1             | 0  | 1   | 0   | 0   | 0   | 0   |
| KDR      | 55782415  | 4   | +   | 1             | 0  | 0   | 0   | 5   | 0   | 0   |
| POLR2B   | 57860624  | 4   | +   | 2             | 0  | 0   | 0   | 8   | 0   | 6   |
| LPHN3    | 62678304  | 4   | -   | 1             | 0  | 240 | 0   | 0   | 0   | 0   |
| UBA6     | 68524040  | 4   | +   | 1             | 0  | 0   | 0   | 90  | 0   | 0   |
| UGT2A3   | 69815705  | 4   | +   | 2             | 0  | 0   | 64  | 2   | 0   | 0   |
| RASSF6   | 74488529  | 4   | -   | 2             | 0  | 0   | 2   | 11  | 0   | 0   |
| MTHFD2L  | 75066040  | 4   | +   | 2             | 0  | 0   | 1   | 20  | 0   | 0   |
| NAA11    | 80200303  | 4   | +   | 1             | 0  | 0   | 0   | 0   | 5   | 0   |
| GK2      | 80380879  | 4   | +   | 1             | 0  | 0   | 0   | 4   | 0   | 0   |
| AGPAT9   | 84498600  | 4   | -   | 1             | 0  | 0   | 0   | 0   | 0   | 1   |
| WDFY3    | 85744065  | 4   | +   | 1             | 8  | 0   | 0   | 0   | 0   | 0   |
| PTPN13   | 87708841  | 4   | +   | 2             | 0  | 15  | 0   | 0   | 4   | 0   |
| PDHA2    | 97280756  | 4   | +   | 1             | 0  | 2   | 0   | 0   | 0   | 0   |
| PDHA2    | 97567416  | 4   | +   | 1             | 0  | 0   | 0   | 0   | 0   | 3   |
| SLC39A8  | 103328825 | 4   | +   | 1             | 2  | 0   | 0   | 0   | 0   | 0   |
| TACR3    | 104497597 | 4   | -   | 2             | 0  | 1   | 0   | 2   | 0   | 0   |
| CXXC4    | 105706604 | 4   | +   | 1             | 0  | 0   | 0   | 0   | 6   | 0   |
| TBCK     | 106996302 | 4   | +   | 1             | 0  | 0   | 0   | 9   | 0   | 0   |
| C4orf32  | 113033221 | 4   | -   | 1             | 0  | 60  | 0   | 0   | 0   | 0   |
| CAMK2D   | 114654959 | 4   | +   | 1             | 10 | 0   | 0   | 0   | 0   | 0   |
| NDST4    | 116279532 | 4   | +   | 1             | 0  | 0   | 0   | 0   | 0   | 1   |
| NDST3    | 118710745 | 4   | -   | 1             | 0  | 0   | 0   | 5   | 0   | 0   |
| PDE5A    | 120394658 | 4   | -   | 1             | 0  | 0   | 0   | 0   | 19  | 0   |

Supplementary Table 1: IS tracking over time

| Gene    | IS Locus  | Chr | Ori | N Times Found | M6  | M9 | M12 | M17 | M21 | M24 |
|---------|-----------|-----|-----|---------------|-----|----|-----|-----|-----|-----|
| TRPC3   | 122805059 | 4   | -   | 1             | 0   | 0  | 0   | 2   | 0   | 0   |
| SPATA5  | 124065196 | 4   | +   | 1             | 0   | 0  | 18  | 0   | 0   | 0   |
| FAT4    | 126320774 | 4   | +   | 1             | 0   | 0  | 0   | 12  | 0   | 0   |
| HSPA4L  | 128728666 | 4   | +   | 1             | 6   | 0  | 0   | 0   | 0   | 0   |
| PCDH18  | 137366012 | 4   | +   | 1             | 0   | 0  | 0   | 17  | 0   | 0   |
| MAML3   | 141093494 | 4   | -   | 1             | 0   | 1  | 0   | 0   | 0   | 0   |
| USP38   | 144115645 | 4   | +   | 1             | 0   | 0  | 0   | 12  | 0   | 0   |
| SMARCA5 | 144471652 | 4   | +   | 1             | 0   | 0  | 0   | 0   | 3   | 0   |
| NR3C2   | 149101886 | 4   | +   | 1             | 0   | 2  | 0   | 0   | 0   | 0   |
| LRBA    | 151516349 | 4   | -   | 1             | 0   | 0  | 2   | 0   | 0   | 0   |
| FBXW7   | 153318796 | 4   | +   | 1             | 0   | 0  | 0   | 0   | 2   | 0   |
| TLL1    | 167286127 | 4   | +   | 1             | 0   | 0  | 0   | 0   | 1   | 0   |
| GALNTL6 | 171966862 | 4   | -   | 1             | 0   | 0  | 0   | 2   | 0   | 0   |
| GALNTL6 | 172019854 | 4   | +   | 1             | 0   | 0  | 105 | 0   | 0   | 0   |
| GALNTL6 | 172164610 | 4   | -   | 1             | 0   | 0  | 62  | 0   | 0   | 0   |
| GLRA3   | 175556116 | 4   | +   | 1             | 0   | 0  | 0   | 0   | 14  | 0   |
| GPM6A   | 176353939 | 4   | -   | 1             | 0   | 0  | 0   | 2   | 0   | 0   |
| GPM6A   | 176943894 | 4   | +   | 1             | 0   | 0  | 0   | 10  | 0   | 0   |
| WDR17   | 176996586 | 4   | -   | 1             | 0   | 0  | 0   | 4   | 0   | 0   |
| WDR17   | 177003762 | 4   | +   | 1             | 1   | 0  | 0   | 0   | 0   | 0   |
| ODZ3    | 183401192 | 4   | -   | 1             | 0   | 0  | 0   | 0   | 0   | 6   |
| DNAH5   | 13212191  | 5   | -   | 1             | 0   | 0  | 0   | 11  | 0   | 0   |
| DNAH5   | 13768387  | 5   | +   | 1             | 0   | 0  | 28  | 0   | 0   | 0   |
| CDH18   | 20061651  | 5   | -   | 1             | 12  | 0  | 0   | 0   | 0   | 0   |
| CDH10   | 24119092  | 5   | -   | 2             | 0   | 0  | 8   | 0   | 48  | 0   |
| CDH10   | 24532396  | 5   | +   | 1             | 0   | 0  | 2   | 0   | 0   | 0   |
| CDH9    | 28122890  | 5   | +   | 1             | 17  | 0  | 0   | 0   | 0   | 0   |
| C5orf42 | 37230759  | 5   | +   | 1             | 0   | 0  | 0   | 2   | 0   | 0   |
| WDR70   | 37658968  | 5   | -   | 1             | 0   | 0  | 4   | 0   | 0   | 0   |
| ARL15   | 53167519  | 5   | -   | 1             | 0   | 4  | 0   | 0   | 0   | 0   |
| KIF2A   | 61642606  | 5   | -   | 1             | 0   | 0  | 0   | 1   | 0   | 0   |
| FCHO2   | 72310573  | 5   | -   | 1             | 0   | 0  | 15  | 0   | 0   | 0   |
| FAM169A | 74099226  | 5   | -   | 1             | 0   | 0  | 0   | 1   | 0   | 0   |
| AGGF1   | 76303567  | 5   | -   | 2             | 0   | 2  | 0   | 12  | 0   | 0   |
| AP3B1   | 77356704  | 5   | +   | 1             | 0   | 0  | 0   | 0   | 0   | 1   |
| AP3B1   | 77411442  | 5   | +   | 1             | 0   | 0  | 4   | 0   | 0   | 0   |
| JMY     | 78560608  | 5   | +   | 1             | 0   | 0  | 0   | 12  | 0   | 0   |
| CHD1    | 98228091  | 5   | +   | 1             | 0   | 0  | 0   | 3   | 0   | 0   |
| FAM174A | 99873036  | 5   | +   | 1             | 0   | 0  | 0   | 1   | 0   | 0   |
| ST8SIA4 | 100214626 | 5   | +   | 1             | 0   | 0  | 19  | 0   | 0   | 0   |
| EFNA5   | 106126545 | 5   | -   | 2             | 102 | 0  | 0   | 3   | 0   | 0   |
| PJA2    | 108847479 | 5   | +   | 1             | 0   | 0  | 0   | 0   | 0   | 2   |
| WDR36   | 110450258 | 5   | -   | 1             | 0   | 0  | 0   | 4   | 0   | 0   |
| STARD4  | 110844931 | 5   | +   | 1             | 0   | 0  | 0   | 3   | 0   | 0   |
| C5orf13 | 111075360 | 5   | -   | 1             | 4   | 0  | 0   | 0   | 0   | 0   |
| DTWD2   | 117185244 | 5   | -   | 1             | 0   | 0  | 0   | 0   | 0   | 1   |
| CSNK1G3 | 122941272 | 5   | +   | 1             | 0   | 6  | 0   | 0   | 0   | 0   |
| SLC27A6 | 128354010 | 5   | +   | 1             | 0   | 0  | 0   | 0   | 0   | 2   |
| HINT1   | 130414252 | 5   | -   | 1             | 0   | 24 | 0   | 0   | 0   | 0   |

Supplementary Table 1: IS tracking over time

| Gene            | IS Locus  | Chr | Ori | N Times Found | M6 | M9  | M12 | M17 | M21 | M24 |
|-----------------|-----------|-----|-----|---------------|----|-----|-----|-----|-----|-----|
| HINT1           | 130494762 | 5   | -   | 1             | 12 | 0   | 0   | 0   | 0   | 0   |
| RAPGEF6         | 130848140 | 5   | +   | 1             | 0  | 0   | 0   | 163 | 0   | 0   |
| HNRNPA0         | 137144335 | 5   | -   | 1             | 0  | 4   | 0   | 0   | 0   | 0   |
| ETF1            | 137867897 | 5   | +   | 1             | 0  | 0   | 0   | 1   | 0   | 0   |
| CTNNA1          | 138181882 | 5   | +   | 1             | 0  | 0   | 0   | 0   | 0   | 2   |
| MATR3           | 138640948 | 5   | +   | 1             | 0  | 0   | 0   | 5   | 0   | 0   |
| MATR3           | 138646392 | 5   | +   | 1             | 0  | 0   | 2   | 0   | 0   | 0   |
| ANKHD1-EIF4EBP3 | 139837327 | 5   | +   | 1             | 0  | 0   | 3   | 0   | 0   | 0   |
| JAKMIP2         | 147157608 | 5   | -   | 1             | 2  | 0   | 0   | 0   | 0   | 0   |
| HMMR            | 162909856 | 5   | +   | 1             | 0  | 1   | 0   | 0   | 0   | 0   |
| C5orf25         | 175754700 | 5   | +   | 1             | 0  | 0   | 0   | 41  | 0   | 0   |
| FAF2            | 175883732 | 5   | -   | 1             | 0  | 0   | 0   | 9   | 0   | 0   |
| NSD1            | 176640369 | 5   | -   | 4             | 17 | 0   | 0   | 29  | 12  | 13  |
| NSD1            | 176662410 | 5   | +   | 1             | 0  | 0   | 9   | 0   | 0   | 0   |
| NSD1            | 176696847 | 5   | -   | 1             | 0  | 0   | 21  | 0   | 0   | 0   |
| F12             | 176841284 | 5   | +   | 1             | 0  | 2   | 0   | 0   | 0   | 0   |
| CANX            | 179135567 | 5   | +   | 1             | 1  | 0   | 0   | 0   | 0   | 0   |
| MAML1           | 179181143 | 5   | +   | 1             | 0  | 0   | 5   | 0   | 0   | 0   |
| RNF130          | 179493271 | 5   | -   | 1             | 0  | 0   | 0   | 1   | 0   | 0   |
| FARS2           | 5338764   | 6   | -   | 4             | 22 | 0   | 0   | 3   | 35  | 12  |
| RANBP9          | 13651173  | 6   | +   | 1             | 0  | 1   | 0   | 0   | 0   | 0   |
| RANBP9          | 13662325  | 6   | -   | 1             | 0  | 1   | 0   | 0   | 0   | 0   |
| JARID2          | 15278743  | 6   | -   | 2             | 0  | 1   | 0   | 0   | 0   | 1   |
| RNF144B         | 18426584  | 6   | +   | 1             | 0  | 8   | 0   | 0   | 0   | 0   |
| LRRC16A         | 25403110  | 6   | +   | 2             | 0  | 0   | 8   | 0   | 0   | 2   |
| HIST1H2BC       | 26117118  | 6   | -   | 2             | 0  | 0   | 0   | 20  | 111 | 0   |
| HIST1H1E        | 26147100  | 6   | +   | 1             | 0  | 0   | 0   | 0   | 0   | 2   |
| HIST1H4D        | 26187442  | 6   | -   | 1             | 0  | 0   | 0   | 0   | 0   | 1   |
| BTN3A3          | 26444941  | 6   | -   | 2             | 0  | 0   | 0   | 29  | 0   | 15  |
| ZSCAN23         | 28393196  | 6   | +   | 1             | 0  | 0   | 0   | 0   | 0   | 18  |
| ZNRD1           | 29990285  | 6   | +   | 1             | 0  | 1   | 0   | 0   | 0   | 0   |
| ZNRD1           | 30019834  | 6   | +   | 2             | 0  | 0   | 0   | 14  | 13  | 0   |
| TRIM39          | 30288420  | 6   | -   | 1             | 0  | 8   | 0   | 0   | 0   | 0   |
| TRIM39          | 30300481  | 6   | +   | 2             | 0  | 0   | 0   | 11  | 0   | 3   |
| HLA-E           | 30455439  | 6   | -   | 1             | 0  | 0   | 0   | 0   | 0   | 4   |
| GNL1            | 30488521  | 6   | -   | 2             | 0  | 0   | 0   | 6   | 0   | 4   |
| ATAT1           | 30601077  | 6   | +   | 1             | 13 | 0   | 0   | 0   | 0   | 0   |
| POU5F1          | 31155808  | 6   | -   | 1             | 0  | 1   | 0   | 0   | 0   | 0   |
| HLA-B           | 31311666  | 6   | -   | 1             | 0  | 0   | 2   | 0   | 0   | 0   |
| HLA-B           | 31331645  | 6   | -   | 1             | 0  | 0   | 0   | 0   | 1   | 0   |
| MICA            | 31375342  | 6   | +   | 3             | 1  | 133 | 0   | 0   | 1   | 0   |
| HCP5            | 31440024  | 6   | +   | 2             | 0  | 6   | 6   | 0   | 0   | 0   |
| PRRC2A          | 31590426  | 6   | +   | 1             | 0  | 15  | 0   | 0   | 0   | 0   |
| PRRC2A          | 31606009  | 6   | +   | 1             | 0  | 1   | 0   | 0   | 0   | 0   |
| BAG6            | 31616295  | 6   | -   | 1             | 2  | 0   | 0   | 0   | 0   | 0   |
| GPANK1          | 31631386  | 6   | +   | 1             | 0  | 0   | 222 | 0   | 0   | 0   |
| MSH5            | 31713531  | 6   | -   | 1             | 0  | 0   | 10  | 0   | 0   | 0   |
| LSM2            | 31770593  | 6   | -   | 1             | 0  | 0   | 1   | 0   | 0   | 0   |
| C6orf48         | 31808743  | 6   | -   | 1             | 0  | 0   | 11  | 0   | 0   | 0   |

Supplementary Table 1: IS tracking over time

| Gene     | IS Locus | Chr | Ori | N Times Found | M6 | M9 | M12 | M17 | M21 | M24 |
|----------|----------|-----|-----|---------------|----|----|-----|-----|-----|-----|
| EHMT2    | 31859059 | 6   | -   | 1             | 0  | 0  | 0   | 8   | 0   | 0   |
| C6orf10  | 32235110 | 6   | -   | 1             | 0  | 0  | 0   | 7   | 0   | 0   |
| C6orf10  | 32256477 | 6   | -   | 1             | 0  | 0  | 0   | 4   | 0   | 0   |
| C6orf10  | 32271371 | 6   | -   | 2             | 0  | 19 | 5   | 0   | 0   | 0   |
| C6orf10  | 32282846 | 6   | +   | 1             | 0  | 0  | 0   | 0   | 0   | 11  |
| C6orf10  | 32321360 | 6   | +   | 1             | 0  | 0  | 0   | 5   | 0   | 0   |
| C6orf10  | 32329494 | 6   | -   | 1             | 0  | 0  | 1   | 0   | 0   | 0   |
| HLA-DRB5 | 32519990 | 6   | +   | 1             | 0  | 0  | 0   | 0   | 0   | 1   |
| HLA-DRB1 | 32526725 | 6   | +   | 1             | 0  | 0  | 0   | 0   | 2   | 0   |
| HLA-DRB1 | 32541923 | 6   | -   | 1             | 0  | 1  | 0   | 0   | 0   | 0   |
| HLA-DRB1 | 32569770 | 6   | -   | 1             | 0  | 0  | 1   | 0   | 0   | 0   |
| HLA-DQA1 | 32596069 | 6   | +   | 1             | 0  | 0  | 0   | 0   | 0   | 1   |
| HLA-DQA1 | 32607105 | 6   | +   | 1             | 0  | 0  | 0   | 1   | 0   | 0   |
| HLA-DQA1 | 32609042 | 6   | +   | 1             | 0  | 0  | 0   | 0   | 2   | 0   |
| HLA-DQA1 | 32609046 | 6   | +   | 1             | 0  | 0  | 0   | 1   | 0   | 0   |
| HLA-DQA2 | 32717846 | 6   | +   | 1             | 12 | 0  | 0   | 0   | 0   | 0   |
| PSMB9    | 32846512 | 6   | +   | 1             | 0  | 0  | 1   | 0   | 0   | 0   |
| HLA-DMB  | 32872707 | 6   | -   | 1             | 0  | 0  | 1   | 0   | 0   | 0   |
| HLA-DMB  | 32876377 | 6   | +   | 1             | 0  | 0  | 3   | 0   | 0   | 0   |
| HLA-DMB  | 32876784 | 6   | +   | 3             | 0  | 2  | 12  | 0   | 0   | 6   |
| HLA-DMB  | 32885755 | 6   | -   | 1             | 0  | 0  | 0   | 1   | 0   | 0   |
| HLA-DMB  | 32887873 | 6   | -   | 1             | 1  | 0  | 0   | 0   | 0   | 0   |
| HLA-DMB  | 32891641 | 6   | -   | 1             | 0  | 0  | 0   | 6   | 0   | 0   |
| HLA-DMB  | 32904835 | 6   | -   | 2             | 0  | 0  | 1   | 0   | 3   | 0   |
| BRD2     | 32950668 | 6   | -   | 1             | 0  | 1  | 0   | 0   | 0   | 0   |
| HLA-DOA  | 33004474 | 6   | -   | 1             | 0  | 0  | 0   | 0   | 0   | 6   |
| HLA-DPA1 | 33009225 | 6   | +   | 1             | 0  | 0  | 0   | 7   | 0   | 0   |
| COL11A2  | 33096573 | 6   | +   | 1             | 0  | 0  | 0   | 0   | 0   | 1   |
| COL11A2  | 33155463 | 6   | -   | 1             | 0  | 0  | 0   | 0   | 3   | 0   |
| VPS52    | 33220878 | 6   | -   | 1             | 0  | 0  | 3   | 0   | 0   | 0   |
| KIFC1    | 33374648 | 6   | -   | 1             | 0  | 0  | 13  | 0   | 0   | 0   |
| UHRF1BP1 | 34778001 | 6   | +   | 1             | 0  | 0  | 5   | 0   | 0   | 0   |
| UHRF1BP1 | 34794172 | 6   | +   | 1             | 0  | 0  | 0   | 2   | 0   | 0   |
| UHRF1BP1 | 34809542 | 6   | +   | 1             | 0  | 0  | 0   | 0   | 1   | 0   |
| ANKS1A   | 34945038 | 6   | +   | 1             | 0  | 0  | 13  | 0   | 0   | 0   |
| ANKS1A   | 34965862 | 6   | +   | 1             | 0  | 0  | 0   | 0   | 0   | 3   |
| FKBP5    | 35567240 | 6   | +   | 1             | 6  | 0  | 0   | 0   | 0   | 0   |
| SRPK1    | 35828102 | 6   | +   | 1             | 0  | 0  | 120 | 0   | 0   | 0   |
| KCTD20   | 36432548 | 6   | +   | 1             | 0  | 0  | 1   | 0   | 0   | 0   |
| STK38    | 36507372 | 6   | -   | 1             | 0  | 0  | 12  | 0   | 0   | 0   |
| ZFAND3   | 37867462 | 6   | -   | 1             | 0  | 0  | 0   | 3   | 0   | 0   |
| ZFAND3   | 37887337 | 6   | +   | 3             | 1  | 4  | 54  | 0   | 0   | 0   |
| BTBD9    | 38382468 | 6   | +   | 1             | 0  | 1  | 0   | 0   | 0   | 0   |
| BTBD9    | 38543976 | 6   | +   | 1             | 0  | 3  | 0   | 0   | 0   | 0   |
| USP49    | 41819014 | 6   | +   | 1             | 0  | 0  | 0   | 4   | 0   | 0   |
| UBR2     | 42555167 | 6   | +   | 1             | 4  | 0  | 0   | 0   | 0   | 0   |
| UBR2     | 42577134 | 6   | -   | 1             | 0  | 0  | 1   | 0   | 0   | 0   |
| UBR2     | 42651898 | 6   | +   | 1             | 0  | 0  | 16  | 0   | 0   | 0   |
| PPP2R5D  | 42955293 | 6   | -   | 1             | 0  | 2  | 0   | 0   | 0   | 0   |

Supplementary Table 1: IS tracking over time

| Gene      | IS Locus  | Chr | Ori | N Times Found | M6 | M9 | M12 | M17 | M21 | M24 |
|-----------|-----------|-----|-----|---------------|----|----|-----|-----|-----|-----|
| ZNF318    | 43315475  | 6   | -   | 1             | 0  | 0  | 17  | 0   | 0   | 0   |
| XPO5      | 43526397  | 6   | +   | 1             | 0  | 0  | 0   | 0   | 1   | 0   |
| XPO5      | 43539237  | 6   | -   | 1             | 0  | 0  | 0   | 7   | 0   | 0   |
| SUPT3H    | 45298625  | 6   | -   | 2             | 0  | 1  | 0   | 1   | 0   | 0   |
| CD2AP     | 47495342  | 6   | +   | 1             | 0  | 0  | 0   | 2   | 0   | 0   |
| DST       | 56487972  | 6   | +   | 1             | 0  | 0  | 0   | 0   | 6   | 0   |
| EYS       | 65204474  | 6   | -   | 1             | 1  | 0  | 0   | 0   | 0   | 0   |
| LMBRD1    | 70453229  | 6   | +   | 1             | 0  | 1  | 0   | 0   | 0   | 0   |
| OGFRL1    | 72158346  | 6   | +   | 1             | 0  | 0  | 0   | 0   | 2   | 0   |
| LCA5      | 80196676  | 6   | +   | 1             | 0  | 0  | 0   | 2   | 0   | 0   |
| LCA5      | 80283538  | 6   | -   | 1             | 0  | 0  | 0   | 0   | 0   | 2   |
| RNGTT     | 89641377  | 6   | -   | 1             | 0  | 1  | 0   | 0   | 0   | 0   |
| EPHA7     | 92745357  | 6   | -   | 1             | 0  | 0  | 0   | 0   | 0   | 1   |
| KIAA0776  | 96965860  | 6   | -   | 2             | 0  | 2  | 0   | 0   | 0   | 5   |
| FBXL4     | 99330574  | 6   | +   | 1             | 0  | 0  | 0   | 0   | 2   | 0   |
| PDSS2     | 107756581 | 6   | +   | 1             | 0  | 0  | 198 | 0   | 0   | 0   |
| C6orf170  | 121543127 | 6   | -   | 2             | 0  | 4  | 0   | 1   | 0   | 0   |
| RSPO3     | 127498748 | 6   | -   | 1             | 0  | 0  | 0   | 11  | 0   | 0   |
| AKAP7     | 131474931 | 6   | -   | 1             | 0  | 0  | 0   | 2   | 0   | 0   |
| AHI1      | 135669357 | 6   | -   | 1             | 42 | 0  | 0   | 0   | 0   | 0   |
| CITED2    | 140768238 | 6   | +   | 1             | 0  | 0  | 0   | 6   | 0   | 0   |
| RAB32     | 146876036 | 6   | -   | 1             | 0  | 0  | 0   | 0   | 0   | 1   |
| SYNE1     | 152587816 | 6   | +   | 1             | 0  | 1  | 0   | 0   | 0   | 0   |
| TFB1M     | 155625792 | 6   | +   | 1             | 0  | 0  | 0   | 0   | 1   | 0   |
| ZFAND2A   | 1220742   | 7   | +   | 1             | 0  | 0  | 0   | 0   | 0   | 5   |
| WIPI2     | 5238374   | 7   | +   | 1             | 0  | 16 | 0   | 0   | 0   | 0   |
| RPA3      | 7735113   | 7   | -   | 1             | 0  | 0  | 0   | 0   | 0   | 1   |
| RPA3      | 7777357   | 7   | +   | 1             | 0  | 2  | 0   | 0   | 0   | 0   |
| GLCCI1    | 8064752   | 7   | +   | 1             | 0  | 0  | 0   | 2   | 0   | 0   |
| NXPH1     | 8703383   | 7   | +   | 1             | 0  | 0  | 3   | 0   | 0   | 0   |
| NDUFA4    | 9959286   | 7   | +   | 1             | 0  | 0  | 0   | 0   | 8   | 0   |
| NDUFA4    | 10733301  | 7   | -   | 1             | 0  | 1  | 0   | 0   | 0   | 0   |
| PHF14     | 11031676  | 7   | +   | 1             | 0  | 0  | 0   | 0   | 0   | 3   |
| PHF14     | 11156739  | 7   | -   | 1             | 0  | 0  | 0   | 0   | 1   | 0   |
| THSD7A    | 11806590  | 7   | +   | 1             | 0  | 0  | 0   | 0   | 8   | 0   |
| ARL4A     | 13200477  | 7   | +   | 1             | 0  | 0  | 13  | 0   | 0   | 0   |
| ITGB8     | 20522309  | 7   | -   | 1             | 0  | 0  | 0   | 4   | 0   | 0   |
| MPP6      | 24701650  | 7   | +   | 1             | 0  | 1  | 0   | 0   | 0   | 0   |
| HNRNPA2B1 | 26234772  | 7   | +   | 1             | 0  | 0  | 0   | 6   | 0   | 0   |
| ZNRF2     | 30384537  | 7   | -   | 1             | 2  | 0  | 0   | 0   | 0   | 0   |
| ZNRF2     | 30409741  | 7   | +   | 2             | 6  | 0  | 0   | 4   | 0   | 0   |
| KBTBD2    | 32918809  | 7   | -   | 1             | 0  | 0  | 8   | 0   | 0   | 0   |
| EEPD1     | 36198386  | 7   | -   | 1             | 0  | 0  | 17  | 0   | 0   | 0   |
| GPR141    | 37730877  | 7   | -   | 1             | 0  | 0  | 0   | 1   | 0   | 0   |
| VPS41     | 38837342  | 7   | +   | 1             | 0  | 0  | 0   | 2   | 0   | 0   |
| INHBA     | 41709613  | 7   | +   | 1             | 0  | 0  | 0   | 16  | 0   | 0   |
| STK17A    | 43645003  | 7   | +   | 2             | 0  | 1  | 0   | 11  | 0   | 0   |
| STK17A    | 43645085  | 7   | -   | 1             | 0  | 0  | 0   | 1   | 0   | 0   |
| NUDCD3    | 44451243  | 7   | +   | 1             | 0  | 0  | 0   | 6   | 0   | 0   |

Supplementary Table 1: IS tracking over time

| Gene          | IS Locus  | Chr | Ori | N Times Found | M6 | M9  | M12 | M17 | M21 | M24 |
|---------------|-----------|-----|-----|---------------|----|-----|-----|-----|-----|-----|
| NUDCD3        | 44520356  | 7   | -   | 2             | 71 | 0   | 0   | 1   | 0   | 0   |
| TNS3          | 46755858  | 7   | +   | 1             | 0  | 1   | 0   | 0   | 0   | 0   |
| ABCA13        | 48488684  | 7   | +   | 1             | 0  | 0   | 0   | 15  | 0   | 0   |
| POM121L12     | 52574247  | 7   | -   | 1             | 0  | 0   | 53  | 0   | 0   | 0   |
| POM121L12     | 52694835  | 7   | +   | 1             | 0  | 0   | 0   | 0   | 0   | 1   |
| POM121L12     | 52799868  | 7   | -   | 1             | 0  | 2   | 0   | 0   | 0   | 0   |
| ZNF727        | 61738021  | 7   | +   | 1             | 0  | 0   | 0   | 3   | 0   | 0   |
| ZNF138        | 64258694  | 7   | -   | 1             | 0  | 0   | 0   | 0   | 9   | 0   |
| AUTS2         | 69139727  | 7   | +   | 1             | 0  | 0   | 0   | 3   | 0   | 0   |
| AUTS2         | 69604371  | 7   | +   | 1             | 0  | 0   | 0   | 5   | 0   | 0   |
| GTF2I         | 74129682  | 7   | +   | 1             | 0  | 5   | 0   | 0   | 0   | 0   |
| GTF2I         | 74136390  | 7   | +   | 1             | 33 | 0   | 0   | 0   | 0   | 0   |
| PHTF2         | 77551940  | 7   | +   | 1             | 0  | 0   | 0   | 6   | 0   | 0   |
| GNAT3         | 80152654  | 7   | +   | 1             | 7  | 0   | 0   | 0   | 0   | 0   |
| CACNA2D1      | 81668851  | 7   | -   | 1             | 0  | 0   | 9   | 0   | 0   | 0   |
| SEMA3D        | 84827153  | 7   | +   | 1             | 0  | 0   | 1   | 0   | 0   | 0   |
| SEMA3D        | 84869354  | 7   | -   | 1             | 0  | 0   | 0   | 0   | 10  | 0   |
| KIAA1324L     | 86526275  | 7   | -   | 1             | 0  | 0   | 0   | 6   | 0   | 0   |
| CDK6          | 92371989  | 7   | +   | 1             | 0  | 0   | 2   | 0   | 0   | 0   |
| SMURF1        | 98700292  | 7   | -   | 1             | 0  | 3   | 0   | 0   | 0   | 0   |
| GPC2          | 99772439  | 7   | -   | 1             | 0  | 0   | 0   | 0   | 0   | 1   |
| GATS          | 99881446  | 7   | +   | 1             | 0  | 336 | 0   | 0   | 0   | 0   |
| ZNHIT1        | 100863221 | 7   | -   | 1             | 0  | 0   | 1   | 0   | 0   | 0   |
| CUX1          | 101659927 | 7   | -   | 1             | 0  | 0   | 3   | 0   | 0   | 0   |
| SRPK2         | 104834983 | 7   | -   | 1             | 0  | 19  | 0   | 0   | 0   | 0   |
| COG5          | 106918345 | 7   | +   | 1             | 0  | 2   | 0   | 0   | 0   | 0   |
| IMMP2L        | 110835520 | 7   | -   | 1             | 0  | 0   | 2   | 0   | 0   | 0   |
| DOCK4         | 111621173 | 7   | +   | 1             | 0  | 0   | 0   | 1   | 0   | 0   |
| TMEM168       | 112416147 | 7   | -   | 1             | 0  | 0   | 3   | 0   | 0   | 0   |
| C7orf60       | 112463352 | 7   | -   | 1             | 50 | 0   | 0   | 0   | 0   | 0   |
| C7orf58       | 120673083 | 7   | -   | 1             | 0  | 1   | 0   | 0   | 0   | 0   |
| IQUB          | 123071227 | 7   | -   | 1             | 0  | 0   | 0   | 9   | 0   | 0   |
| WASL          | 123335824 | 7   | +   | 1             | 0  | 0   | 0   | 0   | 0   | 1   |
| WDR91         | 134889386 | 7   | +   | 1             | 0  | 0   | 42  | 0   | 0   | 0   |
| TRIM24        | 138067928 | 7   | -   | 1             | 0  | 0   | 0   | 0   | 53  | 0   |
| TRIM24        | 138258824 | 7   | -   | 1             | 0  | 0   | 0   | 15  | 0   | 0   |
| LUC7L2        | 139088197 | 7   | +   | 1             | 0  | 0   | 0   | 8   | 0   | 0   |
| MTRNR2L6      | 142356396 | 7   | -   | 2             | 0  | 2   | 0   | 60  | 0   | 0   |
| EZH2          | 148514464 | 7   | -   | 2             | 0  | 2   | 0   | 4   | 0   | 0   |
| GIMAP1-GIMAP5 | 150421512 | 7   | +   | 1             | 0  | 0   | 4   | 0   | 0   | 0   |
| MLL3          | 151972126 | 7   | -   | 1             | 0  | 1   | 0   | 0   | 0   | 0   |
| MLL3          | 152116003 | 7   | +   | 2             | 0  | 0   | 18  | 0   | 1   | 0   |
| WDR60         | 158686122 | 7   | +   | 2             | 0  | 0   | 1   | 1   | 0   | 0   |
| SGCZ          | 14050128  | 8   | +   | 2             | 0  | 0   | 4   | 0   | 0   | 11  |
| SGCZ          | 14519575  | 8   | +   | 1             | 0  | 0   | 0   | 4   | 0   | 0   |
| SGCZ          | 14524684  | 8   | +   | 1             | 3  | 0   | 0   | 0   | 0   | 0   |
| MSR1          | 16407796  | 8   | +   | 1             | 0  | 0   | 0   | 18  | 0   | 0   |
| PCM1          | 17841843  | 8   | -   | 1             | 0  | 0   | 6   | 0   | 0   | 0   |
| XPO7          | 21872390  | 8   | +   | 1             | 0  | 0   | 5   | 0   | 0   | 0   |



Supplementary Table 1: IS tracking over time

| Gene     | IS Locus  | Chr | Ori | N Times Found | M6 | M9 | M12 | M17 | M21 | M24 |
|----------|-----------|-----|-----|---------------|----|----|-----|-----|-----|-----|
| ADAM7    | 24331655  | 8   | -   | 1             | 0  | 0  | 0   | 0   | 60  | 0   |
| FZD3     | 28369530  | 8   | +   | 1             | 0  | 0  | 0   | 11  | 0   | 0   |
| NRG1     | 32791577  | 8   | +   | 1             | 0  | 0  | 0   | 0   | 0   | 2   |
| ADAM9    | 38888589  | 8   | -   | 1             | 0  | 3  | 0   | 0   | 0   | 0   |
| ADAM32   | 39200683  | 8   | -   | 1             | 0  | 1  | 0   | 0   | 0   | 0   |
| IDO2     | 39796398  | 8   | +   | 1             | 0  | 3  | 0   | 0   | 0   | 0   |
| PLAG1    | 57119049  | 8   | -   | 1             | 0  | 0  | 0   | 0   | 0   | 1   |
| TOX      | 60338870  | 8   | +   | 1             | 0  | 2  | 0   | 0   | 0   | 0   |
| CYP7B1   | 65562731  | 8   | -   | 1             | 0  | 0  | 0   | 0   | 2   | 0   |
| PDE7A    | 66637612  | 8   | +   | 1             | 0  | 0  | 2   | 0   | 0   | 0   |
| NCOA2    | 71293931  | 8   | -   | 1             | 0  | 0  | 0   | 10  | 0   | 0   |
| TRAM1    | 71505391  | 8   | +   | 1             | 0  | 0  | 0   | 5   | 0   | 0   |
| FAM164A  | 79631441  | 8   | +   | 1             | 0  | 0  | 0   | 0   | 0   | 1   |
| RALYL    | 84067942  | 8   | +   | 1             | 0  | 0  | 0   | 7   | 0   | 0   |
| RALYL    | 84096885  | 8   | +   | 1             | 0  | 0  | 0   | 0   | 0   | 3   |
| WWP1     | 87404692  | 8   | -   | 1             | 0  | 0  | 0   | 44  | 0   | 0   |
| C8orf83  | 93905242  | 8   | -   | 1             | 0  | 0  | 0   | 0   | 0   | 10  |
| C8orf83  | 93925441  | 8   | -   | 1             | 0  | 0  | 0   | 11  | 0   | 0   |
| VPS13B   | 100604379 | 8   | +   | 1             | 0  | 0  | 0   | 4   | 0   | 0   |
| ANKRD46  | 101540473 | 8   | +   | 1             | 0  | 0  | 0   | 0   | 0   | 2   |
| RIMS2    | 104637493 | 8   | -   | 1             | 0  | 0  | 4   | 0   | 0   | 0   |
| ZFPM2    | 106371915 | 8   | -   | 1             | 0  | 2  | 0   | 0   | 0   | 0   |
| OXR1     | 107697108 | 8   | +   | 1             | 0  | 0  | 0   | 5   | 0   | 0   |
| TRHR     | 110101292 | 8   | +   | 1             | 0  | 1  | 0   | 0   | 0   | 0   |
| KCNV1    | 111767529 | 8   | -   | 1             | 0  | 0  | 0   | 20  | 0   | 0   |
| CSMD3    | 113667885 | 8   | +   | 1             | 0  | 0  | 0   | 0   | 1   | 0   |
| CSMD3    | 114551195 | 8   | +   | 1             | 0  | 0  | 42  | 0   | 0   | 0   |
| CSMD3    | 114756014 | 8   | -   | 1             | 0  | 0  | 0   | 3   | 0   | 0   |
| CSMD3    | 114882012 | 8   | -   | 1             | 0  | 0  | 0   | 1   | 0   | 0   |
| MED30    | 118540130 | 8   | -   | 2             | 51 | 0  | 0   | 3   | 0   | 0   |
| MRPL13   | 121434318 | 8   | +   | 1             | 45 | 0  | 0   | 0   | 0   | 0   |
| FER1L6   | 125135487 | 8   | -   | 1             | 0  | 0  | 0   | 14  | 0   | 0   |
| TMEM65   | 125359077 | 8   | +   | 1             | 0  | 0  | 0   | 0   | 0   | 2   |
| GSDMC    | 130614875 | 8   | -   | 2             | 0  | 0  | 0   | 2   | 1   | 0   |
| PTK2     | 141944223 | 8   | +   | 2             | 85 | 0  | 0   | 1   | 0   | 0   |
| LY6H     | 144200039 | 8   | -   | 2             | 0  | 0  | 6   | 6   | 0   | 0   |
| ZNF623   | 144737149 | 8   | -   | 1             | 0  | 0  | 0   | 1   | 0   | 0   |
| EXOSC4   | 145135832 | 8   | -   | 1             | 0  | 0  | 0   | 0   | 2   | 0   |
| PPP1R16A | 145720203 | 8   | -   | 1             | 0  | 0  | 0   | 1   | 0   | 0   |
| ZNF251   | 145972626 | 8   | -   | 1             | 0  | 0  | 0   | 143 | 0   | 0   |
| ZNF16    | 146147830 | 8   | -   | 1             | 2  | 0  | 0   | 0   | 0   | 0   |
| C8orf33  | 146236721 | 8   | +   | 1             | 0  | 0  | 0   | 0   | 0   | 3   |
| RFX3     | 3129217   | 9   | -   | 1             | 0  | 0  | 6   | 0   | 0   | 0   |
| KIAA2026 | 5931459   | 9   | -   | 1             | 0  | 0  | 0   | 2   | 0   | 0   |
| C9orf93  | 15834089  | 9   | +   | 1             | 0  | 0  | 0   | 0   | 0   | 10  |
| C9orf93  | 15844795  | 9   | -   | 1             | 0  | 0  | 4   | 0   | 0   | 0   |
| CNTLN    | 17277937  | 9   | -   | 1             | 0  | 0  | 1   | 0   | 0   | 0   |
| MLLT3    | 20480115  | 9   | +   | 1             | 0  | 0  | 0   | 0   | 0   | 6   |
| KIAA1797 | 20821625  | 9   | -   | 2             | 0  | 0  | 0   | 13  | 7   | 0   |

Supplementary Table 1: IS tracking over time

| Gene     | IS Locus  | Chr | Ori | N Times Found | M6  | M9 | M12 | M17 | M21 | M24 |
|----------|-----------|-----|-----|---------------|-----|----|-----|-----|-----|-----|
| IFT74    | 27055375  | 9   | +   | 1             | 0   | 0  | 0   | 8   | 0   | 0   |
| ACO1     | 31435139  | 9   | -   | 1             | 0   | 0  | 0   | 0   | 8   | 0   |
| UBAP2    | 33991592  | 9   | -   | 1             | 0   | 0  | 43  | 0   | 0   | 0   |
| HRCT1    | 35889324  | 9   | -   | 1             | 0   | 0  | 0   | 0   | 3   | 0   |
| GNE      | 36244454  | 9   | -   | 1             | 0   | 7  | 0   | 0   | 0   | 0   |
| PTAR1    | 72362489  | 9   | +   | 1             | 0   | 0  | 0   | 2   | 0   | 0   |
| TMEM2    | 74317740  | 9   | -   | 1             | 0   | 3  | 0   | 0   | 0   | 0   |
| RASEF    | 85552423  | 9   | -   | 3             | 0   | 9  | 23  | 7   | 0   | 0   |
| UBQLN1   | 86282173  | 9   | -   | 1             | 0   | 2  | 0   | 0   | 0   | 0   |
| SECISBP2 | 91939842  | 9   | -   | 1             | 0   | 1  | 0   | 0   | 0   | 0   |
| GADD45G  | 92796496  | 9   | +   | 1             | 0   | 0  | 12  | 0   | 0   | 0   |
| AUH      | 94022195  | 9   | -   | 1             | 0   | 0  | 0   | 48  | 0   | 0   |
| SPTLC1   | 94814140  | 9   | +   | 1             | 0   | 3  | 0   | 0   | 0   | 0   |
| IARS     | 95045948  | 9   | +   | 1             | 0   | 43 | 0   | 0   | 0   | 0   |
| FANCC    | 97967944  | 9   | +   | 1             | 0   | 0  | 41  | 0   | 0   | 0   |
| SLC35D2  | 99131612  | 9   | +   | 1             | 0   | 0  | 3   | 0   | 0   | 0   |
| ZNF367   | 99148325  | 9   | -   | 2             | 0   | 0  | 0   | 0   | 458 | 4   |
| HEMGN    | 100693984 | 9   | -   | 1             | 0   | 1  | 0   | 0   | 0   | 0   |
| STX17    | 102674914 | 9   | +   | 1             | 0   | 0  | 40  | 0   | 0   | 0   |
| MURC     | 103403364 | 9   | +   | 1             | 0   | 0  | 0   | 0   | 0   | 9   |
| ZNF462   | 109582327 | 9   | +   | 2             | 0   | 2  | 0   | 0   | 0   | 6   |
| RAD23B   | 110063021 | 9   | +   | 1             | 0   | 0  | 1   | 0   | 0   | 0   |
| ROD1     | 115068781 | 9   | +   | 2             | 0   | 0  | 0   | 1   | 0   | 1   |
| RAB14    | 123953196 | 9   | -   | 1             | 0   | 0  | 60  | 0   | 0   | 0   |
| STOM     | 124127334 | 9   | -   | 1             | 19  | 0  | 0   | 0   | 0   | 0   |
| DENND1A  | 126531813 | 9   | -   | 1             | 7   | 0  | 0   | 0   | 0   | 0   |
| DENND1A  | 126620629 | 9   | -   | 1             | 0   | 0  | 0   | 22  | 0   | 0   |
| DENND1A  | 126627201 | 9   | -   | 1             | 0   | 0  | 10  | 0   | 0   | 0   |
| NR6A1    | 127398152 | 9   | +   | 1             | 0   | 12 | 0   | 0   | 0   | 0   |
| SCAI     | 127786686 | 9   | -   | 1             | 0   | 0  | 0   | 0   | 8   | 0   |
| ZNF79    | 130193444 | 9   | -   | 1             | 0   | 0  | 0   | 0   | 0   | 5   |
| RPL12    | 130210033 | 9   | +   | 3             | 0   | 0  | 1   | 165 | 5   | 0   |
| STXBP1   | 130435284 | 9   | +   | 1             | 0   | 1  | 0   | 0   | 0   | 0   |
| SH2D3C   | 130521721 | 9   | +   | 1             | 0   | 0  | 64  | 0   | 0   | 0   |
| SLC25A25 | 130838144 | 9   | +   | 1             | 0   | 1  | 0   | 0   | 0   | 0   |
| SPTAN1   | 131326675 | 9   | +   | 1             | 0   | 0  | 0   | 0   | 0   | 1   |
| SPTAN1   | 131339894 | 9   | +   | 1             | 0   | 0  | 0   | 3   | 0   | 0   |
| SET      | 131439972 | 9   | +   | 1             | 0   | 0  | 0   | 0   | 25  | 0   |
| SET      | 131455105 | 9   | +   | 1             | 0   | 0  | 5   | 0   | 0   | 0   |
| ZER1     | 131529808 | 9   | -   | 1             | 0   | 0  | 0   | 1   | 0   | 0   |
| LRRRC8A  | 131680073 | 9   | -   | 1             | 0   | 0  | 0   | 1   | 0   | 0   |
| NUP188   | 131750821 | 9   | -   | 1             | 0   | 1  | 0   | 0   | 0   | 0   |
| FNBP1    | 132667938 | 9   | -   | 1             | 0   | 0  | 0   | 3   | 0   | 0   |
| FNBP1    | 132692278 | 9   | -   | 1             | 261 | 0  | 0   | 0   | 0   | 0   |
| FNBP1    | 132741000 | 9   | -   | 1             | 0   | 0  | 0   | 2   | 0   | 0   |
| FNBP1    | 132764566 | 9   | -   | 1             | 0   | 4  | 0   | 0   | 0   | 0   |
| FNBP1    | 132776268 | 9   | -   | 2             | 0   | 0  | 28  | 0   | 1   | 0   |
| MED27    | 134861160 | 9   | -   | 1             | 0   | 0  | 6   | 0   | 0   | 0   |
| MED27    | 134904135 | 9   | +   | 1             | 0   | 1  | 0   | 0   | 0   | 0   |

Supplementary Table 1: IS tracking over time

| Gene     | IS Locus  | Chr | Ori | N Times Found | M6  | M9 | M12 | M17 | M21 | M24 |
|----------|-----------|-----|-----|---------------|-----|----|-----|-----|-----|-----|
| SETX     | 135154026 | 9   | +   | 1             | 0   | 0  | 0   | 0   | 2   | 0   |
| SETX     | 135190979 | 9   | +   | 1             | 0   | 0  | 3   | 0   | 0   | 0   |
| SETX     | 135217480 | 9   | -   | 1             | 0   | 0  | 0   | 0   | 4   | 0   |
| ABO      | 136140966 | 9   | -   | 1             | 0   | 0  | 0   | 11  | 0   | 0   |
| BRD3     | 136896632 | 9   | -   | 1             | 0   | 0  | 0   | 4   | 0   | 0   |
| RXRA     | 137403305 | 9   | -   | 1             | 0   | 0  | 0   | 1   | 0   | 0   |
| CAMSAP1  | 138784845 | 9   | -   | 2             | 0   | 0  | 60  | 0   | 2   | 0   |
| NACC2    | 138924403 | 9   | +   | 1             | 0   | 0  | 0   | 0   | 0   | 11  |
| QSOX2    | 139127226 | 9   | -   | 2             | 0   | 1  | 0   | 19  | 0   | 0   |
| GPSM1    | 139217015 | 9   | +   | 1             | 0   | 0  | 0   | 3   | 0   | 0   |
| SEC16A   | 139342586 | 9   | +   | 1             | 0   | 0  | 0   | 43  | 0   | 0   |
| SEC16A   | 139355110 | 9   | +   | 1             | 0   | 25 | 0   | 0   | 0   | 0   |
| SEC16A   | 139366392 | 9   | -   | 1             | 0   | 0  | 0   | 0   | 0   | 1   |
| NOTCH1   | 139461283 | 9   | +   | 1             | 0   | 0  | 3   | 0   | 0   | 0   |
| TRAF2    | 139787531 | 9   | -   | 1             | 0   | 0  | 0   | 0   | 0   | 4   |
| TRAF2    | 139824157 | 9   | -   | 1             | 0   | 0  | 15  | 0   | 0   | 0   |
| COBRA1   | 140159747 | 9   | +   | 2             | 0   | 0  | 0   | 0   | 15  | 3   |
| COBRA1   | 140165676 | 9   | -   | 1             | 0   | 0  | 0   | 0   | 0   | 11  |
| EXD3     | 140299077 | 9   | -   | 1             | 1   | 0  | 0   | 0   | 0   | 0   |
| AKR1C1   | 4959975   | 10  | -   | 1             | 0   | 0  | 0   | 2   | 0   | 0   |
| SFMBT2   | 7339653   | 10  | +   | 1             | 0   | 0  | 3   | 0   | 0   | 0   |
| GATA3    | 9113723   | 10  | -   | 1             | 0   | 0  | 0   | 22  | 0   | 0   |
| CELF2    | 9788900   | 10  | -   | 3             | 0   | 1  | 3   | 9   | 0   | 0   |
| PLXDC2   | 20042776  | 10  | +   | 1             | 0   | 2  | 0   | 0   | 0   | 0   |
| DNAJC1   | 22213532  | 10  | -   | 1             | 0   | 0  | 0   | 0   | 1   | 0   |
| DNAJC1   | 22267581  | 10  | -   | 1             | 0   | 2  | 0   | 0   | 0   | 0   |
| ARHGAP21 | 24902667  | 10  | -   | 1             | 0   | 17 | 0   | 0   | 0   | 0   |
| MARCH8   | 45972859  | 10  | +   | 1             | 0   | 0  | 0   | 8   | 0   | 0   |
| MARCH8   | 45988416  | 10  | +   | 1             | 0   | 0  | 0   | 0   | 20  | 0   |
| WDFY4    | 49915973  | 10  | +   | 1             | 0   | 0  | 5   | 0   | 0   | 0   |
| PRKG1    | 52984652  | 10  | -   | 1             | 0   | 0  | 0   | 17  | 0   | 0   |
| MBL2     | 54316450  | 10  | +   | 1             | 0   | 0  | 0   | 5   | 0   | 0   |
| MBL2     | 54387485  | 10  | +   | 1             | 0   | 2  | 0   | 0   | 0   | 0   |
| ZNF365   | 64183242  | 10  | -   | 1             | 0   | 0  | 0   | 4   | 0   | 0   |
| JMJD1C   | 65219372  | 10  | +   | 1             | 0   | 0  | 0   | 0   | 18  | 0   |
| PSAP     | 73659273  | 10  | -   | 1             | 0   | 1  | 0   | 0   | 0   | 0   |
| CBARA1   | 74311516  | 10  | +   | 1             | 0   | 2  | 0   | 0   | 0   | 0   |
| P4HA1    | 74794865  | 10  | -   | 3             | 0   | 2  | 37  | 0   | 0   | 6   |
| FAM190B  | 86098182  | 10  | +   | 3             | 0   | 0  | 19  | 71  | 19  | 0   |
| EXOC6    | 94526880  | 10  | -   | 1             | 0   | 0  | 0   | 0   | 3   | 0   |
| EXOC6    | 94658783  | 10  | +   | 2             | 114 | 0  | 0   | 38  | 0   | 0   |
| LCOR     | 98711829  | 10  | +   | 1             | 0   | 0  | 0   | 0   | 0   | 4   |
| LCOR     | 98716741  | 10  | -   | 1             | 0   | 0  | 0   | 0   | 0   | 1   |
| MMS19    | 99254938  | 10  | -   | 1             | 0   | 4  | 0   | 0   | 0   | 0   |
| ERLIN1   | 101926243 | 10  | -   | 2             | 3   | 7  | 0   | 0   | 0   | 0   |
| C10orf76 | 103623027 | 10  | +   | 1             | 0   | 0  | 249 | 0   | 0   | 0   |
| C10orf95 | 104214152 | 10  | -   | 1             | 0   | 0  | 4   | 0   | 0   | 0   |
| SORCS1   | 109444873 | 10  | -   | 1             | 0   | 0  | 1   | 0   | 0   | 0   |
| SORCS1   | 110129086 | 10  | -   | 2             | 0   | 0  | 2   | 0   | 3   | 0   |

Supplementary Table 1: IS tracking over time

| Gene         | IS Locus  | Chr | Ori | N Times Found | M6  | M9 | M12 | M17 | M21 | M24 |
|--------------|-----------|-----|-----|---------------|-----|----|-----|-----|-----|-----|
| XPNPEP1      | 111295769 | 10  | -   | 2             | 0   | 0  | 1   | 1   | 0   | 0   |
| METTL10      | 126472363 | 10  | +   | 2             | 22  | 1  | 0   | 0   | 0   | 0   |
| ZRANB1       | 126651153 | 10  | +   | 1             | 0   | 0  | 0   | 3   | 0   | 0   |
| ADAM12       | 127833188 | 10  | +   | 1             | 0   | 0  | 0   | 0   | 0   | 1   |
| MGMT         | 131054379 | 10  | +   | 1             | 0   | 0  | 0   | 0   | 0   | 4   |
| INPP5A       | 134557514 | 10  | -   | 1             | 0   | 6  | 0   | 0   | 0   | 0   |
| NLRP6        | 275733    | 11  | -   | 1             | 0   | 0  | 0   | 0   | 5   | 0   |
| CDHR5        | 623689    | 11  | -   | 1             | 0   | 0  | 0   | 1   | 0   | 0   |
| DEAF1        | 666720    | 11  | -   | 1             | 0   | 0  | 0   | 1   | 0   | 0   |
| DEAF1        | 683679    | 11  | +   | 1             | 0   | 0  | 0   | 0   | 0   | 9   |
| AP2A2        | 946297    | 11  | -   | 1             | 0   | 0  | 0   | 0   | 0   | 9   |
| TNNT3        | 1931228   | 11  | -   | 1             | 0   | 0  | 0   | 0   | 0   | 1   |
| ZNF195       | 3387971   | 11  | -   | 1             | 0   | 24 | 0   | 0   | 0   | 0   |
| STIM1        | 3978381   | 11  | +   | 1             | 37  | 0  | 0   | 0   | 0   | 0   |
| STIM1        | 4068060   | 11  | +   | 1             | 0   | 5  | 0   | 0   | 0   | 0   |
| TRIM34       | 5665934   | 11  | -   | 1             | 0   | 0  | 0   | 21  | 0   | 0   |
| TRIM22       | 5717117   | 11  | +   | 2             | 0   | 11 | 0   | 7   | 0   | 0   |
| DNHD1        | 6545356   | 11  | -   | 1             | 0   | 1  | 0   | 0   | 0   | 0   |
| ZNF143       | 9497933   | 11  | +   | 1             | 0   | 0  | 5   | 0   | 0   | 0   |
| SBF2         | 9967486   | 11  | +   | 1             | 0   | 1  | 0   | 0   | 0   | 0   |
| SBF2         | 10022194  | 11  | +   | 1             | 0   | 0  | 2   | 0   | 0   | 0   |
| SBF2         | 10074446  | 11  | -   | 1             | 0   | 1  | 0   | 0   | 0   | 0   |
| SBF2         | 10146275  | 11  | -   | 1             | 0   | 0  | 31  | 0   | 0   | 0   |
| SBF2         | 10264046  | 11  | +   | 1             | 0   | 0  | 0   | 2   | 0   | 0   |
| RRAS2        | 14307105  | 11  | -   | 1             | 0   | 1  | 0   | 0   | 0   | 0   |
| SLC17A6      | 22441546  | 11  | +   | 1             | 0   | 0  | 1   | 0   | 0   | 0   |
| LOC100500938 | 22871040  | 11  | +   | 1             | 14  | 0  | 0   | 0   | 0   | 0   |
| LOC100500938 | 23191492  | 11  | +   | 1             | 0   | 0  | 11  | 0   | 0   | 0   |
| LUZP2        | 24864574  | 11  | -   | 1             | 0   | 3  | 0   | 0   | 0   | 0   |
| DCDC1        | 31172062  | 11  | +   | 1             | 0   | 0  | 52  | 0   | 0   | 0   |
| CAT          | 34480317  | 11  | -   | 2             | 226 | 0  | 0   | 4   | 0   | 0   |
| LRRC4C       | 39380201  | 11  | -   | 1             | 0   | 0  | 0   | 0   | 0   | 4   |
| CKAP5        | 46772335  | 11  | +   | 2             | 130 | 0  | 0   | 1   | 0   | 0   |
| CKAP5        | 46791355  | 11  | -   | 1             | 0   | 0  | 1   | 0   | 0   | 0   |
| C11orf49     | 47142306  | 11  | -   | 2             | 0   | 0  | 0   | 7   | 16  | 0   |
| PTPRJ        | 47947231  | 11  | -   | 1             | 0   | 3  | 0   | 0   | 0   | 0   |
| MS4A6A       | 59993663  | 11  | +   | 1             | 0   | 0  | 0   | 0   | 9   | 0   |
| INCENP       | 61846889  | 11  | -   | 1             | 5   | 0  | 0   | 0   | 0   | 0   |
| BSCL2        | 62469753  | 11  | +   | 1             | 0   | 0  | 25  | 0   | 0   | 0   |
| TTC9C        | 62498835  | 11  | +   | 1             | 0   | 0  | 0   | 0   | 0   | 1   |
| NXF1         | 62563744  | 11  | +   | 1             | 2   | 0  | 0   | 0   | 0   | 0   |
| SLC3A2       | 62621349  | 11  | -   | 1             | 0   | 2  | 0   | 0   | 0   | 0   |
| ATL3         | 63426990  | 11  | +   | 1             | 0   | 0  | 0   | 10  | 0   | 0   |
| RTN3         | 63489283  | 11  | +   | 1             | 0   | 0  | 4   | 0   | 0   | 0   |
| RTN3         | 63498480  | 11  | +   | 1             | 0   | 0  | 10  | 0   | 0   | 0   |
| MARK2        | 63618586  | 11  | -   | 3             | 45  | 0  | 12  | 1   | 0   | 0   |
| STIP1        | 63960511  | 11  | +   | 1             | 0   | 0  | 0   | 42  | 0   | 0   |
| STIP1        | 63964201  | 11  | -   | 1             | 0   | 10 | 0   | 0   | 0   | 0   |
| PLCB3        | 64028340  | 11  | -   | 1             | 0   | 0  | 0   | 0   | 8   | 0   |

Supplementary Table 1: IS tracking over time

| Gene     | IS Locus | Chr | Ori | N Times Found | M6 | M9  | M12 | M17 | M21 | M24 |
|----------|----------|-----|-----|---------------|----|-----|-----|-----|-----|-----|
| CCDC88B  | 64114303 | 11  | -   | 1             | 0  | 0   | 0   | 4   | 0   | 0   |
| SLC22A11 | 64262561 | 11  | +   | 1             | 0  | 0   | 6   | 0   | 0   | 0   |
| SLC22A11 | 64274730 | 11  | -   | 1             | 0  | 0   | 0   | 18  | 0   | 0   |
| SLC22A11 | 64287161 | 11  | +   | 1             | 0  | 0   | 187 | 0   | 0   | 0   |
| SLC22A11 | 64311827 | 11  | +   | 1             | 0  | 0   | 2   | 0   | 0   | 0   |
| SLC22A11 | 64341440 | 11  | +   | 1             | 0  | 0   | 163 | 0   | 0   | 0   |
| SF1      | 64541592 | 11  | -   | 2             | 0  | 0   | 0   | 1   | 0   | 8   |
| SF1      | 64543328 | 11  | -   | 1             | 0  | 0   | 7   | 0   | 0   | 0   |
| MAP4K2   | 64553305 | 11  | -   | 1             | 38 | 0   | 0   | 0   | 0   | 0   |
| MAP4K2   | 64563195 | 11  | +   | 1             | 0  | 0   | 0   | 10  | 0   | 0   |
| C11orf85 | 64718343 | 11  | -   | 1             | 0  | 0   | 2   | 0   | 0   | 0   |
| C11orf2  | 64870577 | 11  | +   | 1             | 0  | 0   | 0   | 2   | 0   | 0   |
| CAPN1    | 64961223 | 11  | -   | 1             | 2  | 0   | 0   | 0   | 0   | 0   |
| CAPN1    | 64963794 | 11  | -   | 1             | 0  | 0   | 1   | 0   | 0   | 0   |
| SLC22A20 | 64995325 | 11  | -   | 1             | 8  | 0   | 0   | 0   | 0   | 0   |
| POLA2    | 65043718 | 11  | +   | 1             | 0  | 0   | 2   | 0   | 0   | 0   |
| POLA2    | 65051283 | 11  | -   | 1             | 0  | 3   | 0   | 0   | 0   | 0   |
| FRMD8    | 65200189 | 11  | +   | 2             | 0  | 0   | 0   | 1   | 0   | 2   |
| FRMD8    | 65202350 | 11  | -   | 1             | 34 | 0   | 0   | 0   | 0   | 0   |
| FRMD8    | 65203618 | 11  | -   | 1             | 0  | 0   | 0   | 1   | 0   | 0   |
| FRMD8    | 65204231 | 11  | -   | 1             | 0  | 0   | 0   | 0   | 0   | 4   |
| FRMD8    | 65232040 | 11  | +   | 1             | 0  | 0   | 0   | 0   | 0   | 16  |
| RELA     | 65438369 | 11  | +   | 1             | 0  | 0   | 0   | 11  | 0   | 0   |
| KAT5     | 65456774 | 11  | +   | 1             | 0  | 0   | 0   | 6   | 0   | 0   |
| KAT5     | 65466872 | 11  | -   | 1             | 0  | 0   | 0   | 5   | 0   | 0   |
| PACS1    | 65866043 | 11  | -   | 2             | 0  | 0   | 0   | 26  | 1   | 0   |
| PACS1    | 65869752 | 11  | -   | 1             | 0  | 0   | 14  | 0   | 0   | 0   |
| PACS1    | 65915975 | 11  | -   | 1             | 0  | 0   | 0   | 0   | 0   | 1   |
| PACS1    | 65918042 | 11  | +   | 1             | 0  | 0   | 0   | 0   | 107 | 0   |
| PACS1    | 65921247 | 11  | -   | 1             | 0  | 1   | 0   | 0   | 0   | 0   |
| PACS1    | 65933925 | 11  | +   | 1             | 0  | 0   | 0   | 7   | 0   | 0   |
| PACS1    | 65940108 | 11  | -   | 1             | 0  | 0   | 0   | 10  | 0   | 0   |
| PACS1    | 65946899 | 11  | -   | 1             | 0  | 0   | 0   | 2   | 0   | 0   |
| PACS1    | 65969020 | 11  | -   | 1             | 0  | 110 | 0   | 0   | 0   | 0   |
| PACS1    | 65975615 | 11  | +   | 1             | 0  | 0   | 10  | 0   | 0   | 0   |
| SLC29A2  | 66134404 | 11  | +   | 1             | 0  | 0   | 0   | 0   | 0   | 19  |
| RBM4     | 66417219 | 11  | +   | 3             | 0  | 1   | 0   | 5   | 5   | 0   |
| C11orf80 | 66540735 | 11  | -   | 1             | 0  | 0   | 0   | 0   | 0   | 4   |
| KDM2A    | 66890440 | 11  | -   | 1             | 0  | 0   | 31  | 0   | 0   | 0   |
| KDM2A    | 66918466 | 11  | -   | 1             | 0  | 0   | 54  | 0   | 0   | 0   |
| KDM2A    | 66918488 | 11  | +   | 1             | 0  | 1   | 0   | 0   | 0   | 0   |
| KDM2A    | 66921906 | 11  | +   | 1             | 0  | 0   | 0   | 0   | 3   | 0   |
| KDM2A    | 66948432 | 11  | +   | 1             | 0  | 1   | 0   | 0   | 0   | 0   |
| KDM2A    | 66949312 | 11  | -   | 1             | 0  | 1   | 0   | 0   | 0   | 0   |
| KDM2A    | 66960275 | 11  | -   | 1             | 0  | 304 | 0   | 0   | 0   | 0   |
| KDM2A    | 66972362 | 11  | +   | 1             | 0  | 0   | 0   | 2   | 0   | 0   |
| KDM2A    | 66981207 | 11  | +   | 1             | 40 | 0   | 0   | 0   | 0   | 0   |
| KDM2A    | 66982470 | 11  | +   | 1             | 9  | 0   | 0   | 0   | 0   | 0   |
| KDM2A    | 66983541 | 11  | -   | 1             | 0  | 0   | 0   | 0   | 0   | 1   |

Supplementary Table 1: IS tracking over time

| Gene     | IS Locus  | Chr | Ori | N Times Found | M6 | M9  | M12 | M17 | M21 | M24 |
|----------|-----------|-----|-----|---------------|----|-----|-----|-----|-----|-----|
| KDM2A    | 66985020  | 11  | -   | 1             | 0  | 1   | 0   | 0   | 0   | 0   |
| KDM2A    | 66998733  | 11  | +   | 1             | 0  | 0   | 0   | 11  | 0   | 0   |
| KDM2A    | 67012669  | 11  | -   | 3             | 0  | 0   | 1   | 447 | 2   | 0   |
| ANKRD13D | 67060010  | 11  | +   | 2             | 1  | 0   | 0   | 1   | 0   | 0   |
| ANKRD13D | 67061114  | 11  | -   | 1             | 0  | 0   | 4   | 0   | 0   | 0   |
| CARNS1   | 67191664  | 11  | -   | 1             | 0  | 22  | 0   | 0   | 0   | 0   |
| CORO1B   | 67212236  | 11  | +   | 1             | 0  | 0   | 0   | 3   | 0   | 0   |
| CHKA     | 67831181  | 11  | +   | 1             | 0  | 0   | 2   | 0   | 0   | 0   |
| CHKA     | 67859613  | 11  | -   | 1             | 2  | 0   | 0   | 0   | 0   | 0   |
| CHKA     | 67883638  | 11  | -   | 1             | 0  | 0   | 20  | 0   | 0   | 0   |
| SUV420H1 | 67945929  | 11  | -   | 1             | 0  | 0   | 0   | 2   | 0   | 0   |
| SUV420H1 | 67953204  | 11  | -   | 1             | 0  | 0   | 16  | 0   | 0   | 0   |
| PPP6R3   | 68255079  | 11  | -   | 1             | 0  | 0   | 0   | 4   | 0   | 0   |
| PPP6R3   | 68308173  | 11  | +   | 1             | 0  | 0   | 0   | 10  | 0   | 0   |
| CPT1A    | 68534375  | 11  | +   | 1             | 0  | 3   | 0   | 0   | 0   | 0   |
| MYEOV    | 69221584  | 11  | -   | 1             | 0  | 0   | 0   | 0   | 15  | 0   |
| PPFIA1   | 70176221  | 11  | -   | 2             | 0  | 0   | 18  | 1   | 0   | 0   |
| RNF121   | 71596420  | 11  | -   | 1             | 0  | 0   | 0   | 47  | 0   | 0   |
| NUMA1    | 71776429  | 11  | -   | 1             | 0  | 0   | 0   | 0   | 1   | 0   |
| NUMA1    | 71778698  | 11  | +   | 1             | 8  | 0   | 0   | 0   | 0   | 0   |
| CLPB     | 72090653  | 11  | +   | 1             | 0  | 0   | 3   | 0   | 0   | 0   |
| FCHSD2   | 72747701  | 11  | +   | 2             | 0  | 0   | 0   | 1   | 0   | 6   |
| FCHSD2   | 72762341  | 11  | -   | 1             | 0  | 0   | 17  | 0   | 0   | 0   |
| FCHSD2   | 72782384  | 11  | -   | 1             | 0  | 0   | 3   | 0   | 0   | 0   |
| FAM168A  | 73141373  | 11  | +   | 1             | 0  | 0   | 0   | 1   | 0   | 0   |
| C2CD3    | 73762143  | 11  | +   | 1             | 0  | 0   | 0   | 0   | 0   | 1   |
| C2CD3    | 73791133  | 11  | +   | 1             | 0  | 0   | 16  | 0   | 0   | 0   |
| C2CD3    | 73844341  | 11  | -   | 1             | 0  | 4   | 0   | 0   | 0   | 0   |
| PGM2L1   | 74078892  | 11  | -   | 1             | 0  | 0   | 0   | 0   | 8   | 0   |
| UVRAG    | 75720828  | 11  | +   | 1             | 0  | 0   | 2   | 0   | 0   | 0   |
| UVRAG    | 75724629  | 11  | -   | 1             | 0  | 0   | 1   | 0   | 0   | 0   |
| UVRAG    | 75746625  | 11  | -   | 1             | 0  | 0   | 0   | 10  | 0   | 0   |
| RSF1     | 77412866  | 11  | -   | 1             | 0  | 0   | 0   | 0   | 8   | 0   |
| INTS4    | 77684586  | 11  | +   | 1             | 0  | 0   | 0   | 1   | 0   | 0   |
| ODZ4     | 79416733  | 11  | -   | 2             | 0  | 1   | 0   | 13  | 0   | 0   |
| PICALM   | 85699268  | 11  | -   | 1             | 5  | 0   | 0   | 0   | 0   | 0   |
| TAF1D    | 93470192  | 11  | +   | 1             | 6  | 0   | 0   | 0   | 0   | 0   |
| MTMR2    | 95586631  | 11  | +   | 1             | 0  | 0   | 4   | 0   | 0   | 0   |
| MTMR2    | 95628024  | 11  | -   | 2             | 0  | 0   | 0   | 41  | 0   | 1   |
| JRKL     | 96877115  | 11  | +   | 1             | 0  | 284 | 0   | 0   | 0   | 0   |
| CNTN5    | 98478566  | 11  | -   | 2             | 0  | 0   | 0   | 3   | 0   | 7   |
| CARD18   | 105078318 | 11  | -   | 2             | 0  | 0   | 95  | 0   | 0   | 1   |
| CARD18   | 105104661 | 11  | -   | 1             | 0  | 24  | 0   | 0   | 0   | 0   |
| AASDHPPT | 105964962 | 11  | +   | 1             | 0  | 0   | 0   | 3   | 0   | 0   |
| CUL5     | 107959033 | 11  | -   | 1             | 0  | 2   | 0   | 0   | 0   | 0   |
| IL18     | 112035935 | 11  | +   | 1             | 0  | 0   | 1   | 0   | 0   | 0   |
| UBE4A    | 118250161 | 11  | -   | 2             | 0  | 0   | 22  | 1   | 0   | 0   |
| ARHGEF12 | 120224561 | 11  | +   | 1             | 0  | 0   | 0   | 22  | 0   | 0   |
| ARHGEF12 | 120256824 | 11  | -   | 1             | 0  | 0   | 0   | 0   | 57  | 0   |

Supplementary Table 1: IS tracking over time

| Gene    | IS Locus  | Chr | Ori | N Times Found | M6 | M9 | M12 | M17 | M21 | M24 |
|---------|-----------|-----|-----|---------------|----|----|-----|-----|-----|-----|
| SORL1   | 121378462 | 11  | +   | 1             | 0  | 1  | 0   | 0   | 0   | 0   |
| BLID    | 122061778 | 11  | -   | 2             | 0  | 0  | 5   | 0   | 0   | 4   |
| VWA5A   | 123996875 | 11  | -   | 1             | 0  | 3  | 0   | 0   | 0   | 0   |
| CHEK1   | 125531247 | 11  | -   | 1             | 0  | 0  | 0   | 0   | 2   | 0   |
| FLI1    | 128542610 | 11  | +   | 1             | 0  | 8  | 0   | 0   | 0   | 0   |
| ZBTB44  | 130146738 | 11  | -   | 3             | 0  | 0  | 21  | 9   | 0   | 5   |
| NCAPD3  | 134083511 | 11  | +   | 1             | 0  | 0  | 0   | 0   | 147 | 0   |
| KDM5A   | 455781    | 12  | -   | 1             | 0  | 0  | 14  | 0   | 0   | 0   |
| WNK1    | 909752    | 12  | +   | 1             | 0  | 0  | 0   | 2   | 0   | 0   |
| ERC1    | 1346864   | 12  | -   | 1             | 0  | 0  | 1   | 0   | 0   | 0   |
| ERC1    | 1351760   | 12  | -   | 1             | 66 | 0  | 0   | 0   | 0   | 0   |
| ERC1    | 1370444   | 12  | -   | 1             | 0  | 0  | 16  | 0   | 0   | 0   |
| ERC1    | 1444377   | 12  | -   | 1             | 0  | 0  | 0   | 4   | 0   | 0   |
| ADIPOR2 | 1809986   | 12  | +   | 1             | 0  | 0  | 0   | 0   | 2   | 0   |
| PARP11  | 3942104   | 12  | +   | 1             | 0  | 93 | 0   | 0   | 0   | 0   |
| PARP11  | 4029425   | 12  | -   | 2             | 0  | 0  | 53  | 1   | 0   | 0   |
| ANO2    | 5861163   | 12  | +   | 1             | 0  | 0  | 0   | 5   | 0   | 0   |
| ANO2    | 5870064   | 12  | -   | 1             | 0  | 0  | 0   | 0   | 0   | 10  |
| VWF     | 6215131   | 12  | +   | 1             | 0  | 0  | 5   | 0   | 0   | 0   |
| VWF     | 6224407   | 12  | +   | 1             | 0  | 1  | 0   | 0   | 0   | 0   |
| VWF     | 6248427   | 12  | -   | 1             | 0  | 0  | 0   | 11  | 0   | 0   |
| TAPBPL  | 6565317   | 12  | -   | 1             | 0  | 2  | 0   | 0   | 0   | 0   |
| NCAPD2  | 6626196   | 12  | -   | 2             | 0  | 0  | 0   | 5   | 0   | 3   |
| CHD4    | 6693529   | 12  | +   | 1             | 9  | 0  | 0   | 0   | 0   | 0   |
| CHD4    | 6698549   | 12  | -   | 1             | 0  | 0  | 1   | 0   | 0   | 0   |
| CHD4    | 6701424   | 12  | +   | 1             | 0  | 0  | 0   | 7   | 0   | 0   |
| ZNF384  | 6783476   | 12  | -   | 1             | 0  | 0  | 0   | 0   | 0   | 3   |
| CD4     | 6914975   | 12  | +   | 1             | 0  | 0  | 43  | 0   | 0   | 0   |
| LRRC23  | 7015419   | 12  | -   | 1             | 1  | 0  | 0   | 0   | 0   | 0   |
| ENO2    | 7028800   | 12  | -   | 1             | 0  | 22 | 0   | 0   | 0   | 0   |
| ATN1    | 7042992   | 12  | -   | 1             | 0  | 0  | 0   | 0   | 2   | 0   |
| LPCAT3  | 7122710   | 12  | +   | 2             | 0  | 0  | 0   | 23  | 1   | 0   |
| PEX5    | 7347929   | 12  | +   | 1             | 0  | 0  | 0   | 1   | 0   | 0   |
| CLEC4C  | 7894395   | 12  | -   | 1             | 0  | 0  | 0   | 0   | 0   | 5   |
| CLEC2D  | 9829702   | 12  | -   | 1             | 0  | 0  | 0   | 0   | 0   | 2   |
| SLCO1B1 | 21265139  | 12  | -   | 1             | 0  | 0  | 2   | 0   | 0   | 0   |
| ETNK1   | 23213117  | 12  | +   | 1             | 0  | 0  | 18  | 0   | 0   | 0   |
| TMTC1   | 29918433  | 12  | -   | 1             | 0  | 0  | 0   | 0   | 0   | 1   |
| DNM1L   | 32857451  | 12  | -   | 1             | 0  | 0  | 18  | 0   | 0   | 0   |
| KIF21A  | 39718159  | 12  | +   | 1             | 0  | 0  | 0   | 0   | 6   | 0   |
| LRRK2   | 40688085  | 12  | +   | 3             | 0  | 14 | 0   | 11  | 0   | 10  |
| PDZRN4  | 41692201  | 12  | +   | 1             | 0  | 1  | 0   | 0   | 0   | 0   |
| ARID2   | 46225911  | 12  | +   | 1             | 0  | 0  | 0   | 0   | 2   | 0   |
| SLC38A2 | 46838575  | 12  | -   | 1             | 0  | 1  | 0   | 0   | 0   | 0   |
| SLC38A4 | 47074934  | 12  | +   | 1             | 0  | 0  | 14  | 0   | 0   | 0   |
| RPAP3   | 48064867  | 12  | +   | 1             | 0  | 17 | 0   | 0   | 0   | 0   |
| RPAP3   | 48089644  | 12  | -   | 1             | 0  | 0  | 0   | 31  | 0   | 0   |
| CCNT1   | 49083670  | 12  | +   | 1             | 44 | 0  | 0   | 0   | 0   | 0   |
| SPATS2  | 49838668  | 12  | +   | 1             | 0  | 5  | 0   | 0   | 0   | 0   |

Supplementary Table 1: IS tracking over time

| Gene     | IS Locus  | Chr | Ori | N Times Found | M6  | M9 | M12 | M17 | M21 | M24 |
|----------|-----------|-----|-----|---------------|-----|----|-----|-----|-----|-----|
| SPATS2   | 49878199  | 12  | +   | 1             | 0   | 0  | 0   | 0   | 0   | 1   |
| SPATS2   | 49899787  | 12  | +   | 1             | 0   | 1  | 0   | 0   | 0   | 0   |
| FMNL3    | 50095069  | 12  | -   | 1             | 33  | 0  | 0   | 0   | 0   | 0   |
| LIMA1    | 50681976  | 12  | +   | 1             | 0   | 0  | 0   | 0   | 5   | 0   |
| DIP2B    | 50940285  | 12  | +   | 1             | 0   | 0  | 0   | 8   | 0   | 0   |
| DIP2B    | 51038968  | 12  | +   | 1             | 0   | 0  | 1   | 0   | 0   | 0   |
| ATF1     | 51213310  | 12  | +   | 1             | 0   | 0  | 7   | 0   | 0   | 0   |
| SP1      | 53780923  | 12  | +   | 1             | 0   | 0  | 0   | 3   | 0   | 0   |
| ATF7     | 53990283  | 12  | -   | 1             | 0   | 0  | 0   | 7   | 0   | 0   |
| NCKAP1L  | 54914150  | 12  | +   | 1             | 4   | 0  | 0   | 0   | 0   | 0   |
| DCD      | 55062397  | 12  | -   | 1             | 0   | 0  | 0   | 3   | 0   | 0   |
| SARNP    | 56158540  | 12  | -   | 1             | 0   | 1  | 0   | 0   | 0   | 0   |
| SARNP    | 56184183  | 12  | +   | 1             | 0   | 0  | 0   | 0   | 0   | 1   |
| SARNP    | 56184867  | 12  | +   | 1             | 21  | 0  | 0   | 0   | 0   | 0   |
| BAZ2A    | 57025606  | 12  | +   | 1             | 0   | 0  | 0   | 7   | 0   | 0   |
| ATP5B    | 57036961  | 12  | -   | 1             | 0   | 0  | 0   | 0   | 12  | 0   |
| ATP5B    | 57045137  | 12  | +   | 1             | 0   | 0  | 0   | 0   | 0   | 2   |
| PRIM1    | 57123576  | 12  | -   | 1             | 0   | 0  | 52  | 0   | 0   | 0   |
| PRIM1    | 57125963  | 12  | -   | 1             | 0   | 1  | 0   | 0   | 0   | 0   |
| R3HDM2   | 57738347  | 12  | +   | 1             | 0   | 0  | 0   | 139 | 0   | 0   |
| INHBC    | 57782855  | 12  | +   | 1             | 0   | 0  | 0   | 1   | 0   | 0   |
| SLC16A7  | 60046866  | 12  | -   | 1             | 0   | 1  | 0   | 0   | 0   | 0   |
| SLC16A7  | 60569274  | 12  | +   | 1             | 0   | 0  | 0   | 1   | 0   | 0   |
| FAM19A2  | 61442083  | 12  | -   | 1             | 0   | 0  | 0   | 0   | 183 | 0   |
| FAM19A2  | 62153137  | 12  | +   | 1             | 0   | 5  | 0   | 0   | 0   | 0   |
| FAM19A2  | 62427441  | 12  | +   | 1             | 0   | 0  | 1   | 0   | 0   | 0   |
| TBK1     | 64879882  | 12  | +   | 1             | 0   | 0  | 0   | 1   | 0   | 0   |
| HMGA2    | 66291604  | 12  | -   | 1             | 0   | 28 | 0   | 0   | 0   | 0   |
| CPSF6    | 69658144  | 12  | +   | 2             | 145 | 0  | 0   | 6   | 0   | 0   |
| TRHDE    | 73509417  | 12  | -   | 1             | 0   | 0  | 0   | 0   | 1   | 0   |
| E2F7     | 77495808  | 12  | -   | 1             | 0   | 0  | 0   | 4   | 0   | 0   |
| PPP1R12A | 80171918  | 12  | -   | 1             | 0   | 0  | 0   | 0   | 0   | 2   |
| OTOGL    | 80606997  | 12  | -   | 1             | 0   | 0  | 0   | 5   | 0   | 0   |
| RASSF9   | 86196184  | 12  | -   | 1             | 0   | 0  | 4   | 0   | 0   | 0   |
| KITLG    | 88815990  | 12  | -   | 1             | 0   | 0  | 3   | 0   | 0   | 0   |
| BTG1     | 92656856  | 12  | -   | 1             | 0   | 0  | 33  | 0   | 0   | 0   |
| CRADD    | 94145376  | 12  | +   | 1             | 0   | 3  | 0   | 0   | 0   | 0   |
| CRADD    | 94346418  | 12  | +   | 3             | 0   | 1  | 0   | 29  | 5   | 0   |
| CDK17    | 96704018  | 12  | +   | 1             | 10  | 0  | 0   | 0   | 0   | 0   |
| CHPT1    | 102096694 | 12  | +   | 1             | 0   | 0  | 0   | 0   | 0   | 1   |
| CCDC53   | 102449933 | 12  | -   | 1             | 0   | 0  | 0   | 3   | 0   | 0   |
| C12orf48 | 102568284 | 12  | +   | 1             | 0   | 0  | 0   | 6   | 0   | 0   |
| PMCH     | 102592986 | 12  | -   | 2             | 0   | 0  | 4   | 7   | 0   | 0   |
| IFT81    | 110630240 | 12  | -   | 2             | 0   | 0  | 18  | 12  | 0   | 0   |
| VPS29    | 110930942 | 12  | -   | 1             | 0   | 1  | 0   | 0   | 0   | 0   |
| SPPL3    | 121227735 | 12  | +   | 1             | 0   | 0  | 4   | 0   | 0   | 0   |
| SPPL3    | 121314729 | 12  | +   | 1             | 0   | 36 | 0   | 0   | 0   | 0   |
| P2RX7    | 121620545 | 12  | -   | 1             | 0   | 0  | 68  | 0   | 0   | 0   |
| VPS33A   | 122730031 | 12  | -   | 1             | 0   | 0  | 0   | 0   | 1   | 0   |



Supplementary Table 1: IS tracking over time

| Gene     | IS Locus  | Chr | Ori | N Times Found | M6  | M9 | M12 | M17 | M21 | M24 |
|----------|-----------|-----|-----|---------------|-----|----|-----|-----|-----|-----|
| CLIP1    | 122823135 | 12  | +   | 1             | 0   | 9  | 0   | 0   | 0   | 0   |
| ZCCHC8   | 122974040 | 12  | -   | 1             | 0   | 0  | 0   | 4   | 0   | 0   |
| KNTC1    | 123055187 | 12  | +   | 1             | 0   | 23 | 0   | 0   | 0   | 0   |
| SBNO1    | 123788178 | 12  | -   | 1             | 0   | 0  | 0   | 0   | 0   | 25  |
| SBNO1    | 123791045 | 12  | +   | 1             | 140 | 0  | 0   | 0   | 0   | 0   |
| IFT88    | 21180690  | 13  | +   | 1             | 0   | 2  | 0   | 0   | 0   | 0   |
| IFT88    | 21224153  | 13  | +   | 1             | 0   | 2  | 0   | 0   | 0   | 0   |
| EFHA1    | 22158724  | 13  | -   | 1             | 0   | 0  | 0   | 0   | 0   | 4   |
| CDK8     | 26943413  | 13  | -   | 1             | 0   | 0  | 0   | 0   | 0   | 3   |
| RPL21    | 27791887  | 13  | -   | 1             | 0   | 0  | 0   | 14  | 0   | 0   |
| PAN3     | 28821854  | 13  | -   | 1             | 0   | 0  | 0   | 1   | 0   | 0   |
| PDS5B    | 33345940  | 13  | +   | 1             | 0   | 0  | 0   | 0   | 0   | 2   |
| PDS5B    | 33352395  | 13  | -   | 1             | 0   | 0  | 0   | 0   | 45  | 0   |
| ELF1     | 41550261  | 13  | +   | 1             | 41  | 0  | 0   | 0   | 0   | 0   |
| MTRF1    | 41826888  | 13  | -   | 1             | 0   | 8  | 0   | 0   | 0   | 0   |
| ENOX1    | 44307418  | 13  | +   | 1             | 0   | 0  | 0   | 0   | 0   | 15  |
| TSC22D1  | 45037135  | 13  | -   | 1             | 0   | 0  | 0   | 0   | 0   | 1   |
| COG3     | 46076450  | 13  | -   | 1             | 5   | 0  | 0   | 0   | 0   | 0   |
| PCDH17   | 58228813  | 13  | -   | 1             | 0   | 0  | 1   | 0   | 0   | 0   |
| TDRD3    | 61044018  | 13  | -   | 1             | 0   | 0  | 4   | 0   | 0   | 0   |
| PCDH9    | 64638011  | 13  | -   | 1             | 0   | 1  | 0   | 0   | 0   | 0   |
| PCDH9    | 67713046  | 13  | -   | 2             | 0   | 0  | 10  | 0   | 1   | 0   |
| PCDH9    | 67947036  | 13  | -   | 1             | 0   | 32 | 0   | 0   | 0   | 0   |
| KLHL1    | 70609223  | 13  | -   | 1             | 0   | 1  | 0   | 0   | 0   | 0   |
| KLHL1    | 70670752  | 13  | -   | 1             | 1   | 0  | 0   | 0   | 0   | 0   |
| KLHL1    | 71308746  | 13  | -   | 1             | 0   | 0  | 5   | 0   | 0   | 0   |
| DACH1    | 72176962  | 13  | -   | 1             | 9   | 0  | 0   | 0   | 0   | 0   |
| DACH1    | 72398193  | 13  | -   | 1             | 0   | 0  | 2   | 0   | 0   | 0   |
| DACH1    | 72532639  | 13  | +   | 1             | 5   | 0  | 0   | 0   | 0   | 0   |
| KLF12    | 74642892  | 13  | -   | 2             | 0   | 0  | 19  | 0   | 1   | 0   |
| UCHL3    | 76130114  | 13  | -   | 1             | 0   | 0  | 4   | 0   | 0   | 0   |
| MYCBP2   | 77802122  | 13  | -   | 1             | 0   | 6  | 0   | 0   | 0   | 0   |
| RBM26    | 79926994  | 13  | -   | 1             | 0   | 0  | 37  | 0   | 0   | 0   |
| SLITRK1  | 83608222  | 13  | -   | 1             | 0   | 0  | 0   | 7   | 0   | 0   |
| SLITRK1  | 83802768  | 13  | +   | 1             | 0   | 0  | 0   | 0   | 0   | 5   |
| SLITRK1  | 85199968  | 13  | -   | 1             | 0   | 0  | 0   | 0   | 0   | 1   |
| SLITRK5  | 89363434  | 13  | +   | 1             | 0   | 0  | 1   | 0   | 0   | 0   |
| SLITRK5  | 89641525  | 13  | +   | 1             | 0   | 0  | 0   | 0   | 8   | 0   |
| GPC5     | 92103005  | 13  | +   | 1             | 0   | 0  | 0   | 1   | 0   | 0   |
| GPC5     | 92150126  | 13  | -   | 1             | 0   | 0  | 2   | 0   | 0   | 0   |
| GPC5     | 92408666  | 13  | -   | 1             | 13  | 0  | 0   | 0   | 0   | 0   |
| UGGT2    | 96669766  | 13  | -   | 1             | 0   | 0  | 2   | 0   | 0   | 0   |
| HS6ST3   | 97515733  | 13  | +   | 1             | 0   | 8  | 0   | 0   | 0   | 0   |
| STK24    | 99105044  | 13  | -   | 1             | 0   | 0  | 0   | 0   | 9   | 0   |
| DAOA     | 105989263 | 13  | -   | 1             | 0   | 0  | 20  | 0   | 0   | 0   |
| TNFSF13B | 108926035 | 13  | -   | 1             | 0   | 1  | 0   | 0   | 0   | 0   |
| MYO16    | 109556509 | 13  | -   | 1             | 0   | 0  | 0   | 0   | 40  | 0   |
| OR4E2    | 22408456  | 14  | +   | 1             | 0   | 0  | 10  | 0   | 0   | 0   |
| OR4E2    | 22531403  | 14  | +   | 1             | 0   | 2  | 0   | 0   | 0   | 0   |

Supplementary Table 1: IS tracking over time

| Gene          | IS Locus  | Chr | Ori | N Times Found | M6 | M9  | M12 | M17 | M21 | M24 |
|---------------|-----------|-----|-----|---------------|----|-----|-----|-----|-----|-----|
| HOMEZ         | 23743382  | 14  | +   | 1             | 0  | 0   | 0   | 1   | 0   | 0   |
| BCL2L2-PABPN1 | 23782136  | 14  | -   | 1             | 0  | 0   | 0   | 14  | 0   | 0   |
| CMA1          | 24970776  | 14  | -   | 1             | 0  | 0   | 27  | 0   | 0   | 0   |
| SCFD1         | 31150001  | 14  | +   | 1             | 0  | 1   | 0   | 0   | 0   | 0   |
| SRP54         | 35465895  | 14  | -   | 1             | 0  | 2   | 0   | 0   | 0   | 0   |
| RALGAPA1      | 36172893  | 14  | -   | 1             | 0  | 0   | 9   | 0   | 0   | 0   |
| LRFN5         | 42982094  | 14  | +   | 1             | 0  | 3   | 0   | 0   | 0   | 0   |
| LRFN5         | 43189083  | 14  | +   | 1             | 0  | 0   | 0   | 0   | 0   | 1   |
| LRFN5         | 43330881  | 14  | +   | 1             | 0  | 0   | 19  | 0   | 0   | 0   |
| MDGA2         | 47676850  | 14  | -   | 1             | 1  | 0   | 0   | 0   | 0   | 0   |
| NEMF          | 50269068  | 14  | -   | 1             | 0  | 0   | 0   | 0   | 0   | 1   |
| MAP4K5        | 50907539  | 14  | -   | 1             | 0  | 4   | 0   | 0   | 0   | 0   |
| ARID4A        | 58755750  | 14  | +   | 1             | 0  | 0   | 0   | 0   | 3   | 0   |
| ARID4A        | 58793175  | 14  | +   | 1             | 0  | 1   | 0   | 0   | 0   | 0   |
| TRMT5         | 61444970  | 14  | +   | 1             | 0  | 1   | 0   | 0   | 0   | 0   |
| RAD51L1       | 68502354  | 14  | -   | 1             | 0  | 0   | 1   | 0   | 0   | 0   |
| PCNX          | 71389597  | 14  | -   | 2             | 0  | 1   | 0   | 14  | 0   | 0   |
| PCNX          | 71453311  | 14  | +   | 1             | 0  | 0   | 0   | 35  | 0   | 0   |
| PCNX          | 71500719  | 14  | +   | 1             | 0  | 0   | 17  | 0   | 0   | 0   |
| PTGR2         | 74324316  | 14  | -   | 1             | 0  | 0   | 28  | 0   | 0   | 0   |
| CEP128        | 81327817  | 14  | +   | 1             | 0  | 0   | 0   | 0   | 0   | 1   |
| GTF2A1        | 81657451  | 14  | +   | 4             | 4  | 199 | 0   | 0   | 240 | 8   |
| SEL1L         | 83603687  | 14  | -   | 1             | 0  | 0   | 0   | 8   | 0   | 0   |
| SMEK1         | 91941829  | 14  | -   | 1             | 0  | 0   | 0   | 0   | 96  | 0   |
| BTBD7         | 93723706  | 14  | +   | 1             | 0  | 2   | 0   | 0   | 0   | 0   |
| PAPOLA        | 96983681  | 14  | +   | 1             | 0  | 0   | 0   | 4   | 0   | 0   |
| RTL1          | 101447688 | 14  | +   | 1             | 0  | 2   | 0   | 0   | 0   | 0   |
| TMEM121       | 106291690 | 14  | +   | 1             | 0  | 0   | 0   | 0   | 0   | 2   |
| TMEM121       | 106308621 | 14  | +   | 1             | 0  | 0   | 5   | 0   | 0   | 0   |
| TMEM121       | 106336150 | 14  | -   | 1             | 0  | 0   | 0   | 11  | 0   | 0   |
| TMEM121       | 106339486 | 14  | -   | 1             | 0  | 0   | 0   | 0   | 1   | 0   |
| TMEM121       | 106462920 | 14  | +   | 1             | 1  | 0   | 0   | 0   | 0   | 0   |
| TMEM121       | 106556639 | 14  | +   | 1             | 30 | 0   | 0   | 0   | 0   | 0   |
| TMEM121       | 106583170 | 14  | +   | 1             | 0  | 0   | 25  | 0   | 0   | 0   |
| TMEM121       | 106583304 | 14  | +   | 1             | 20 | 0   | 0   | 0   | 0   | 0   |
| TMEM121       | 106909186 | 14  | +   | 1             | 0  | 1   | 0   | 0   | 0   | 0   |
| TMEM121       | 106930788 | 14  | +   | 1             | 0  | 0   | 0   | 0   | 0   | 2   |
| FAM189A1      | 29713872  | 15  | -   | 1             | 0  | 0   | 1   | 0   | 0   | 0   |
| KLF13         | 31575703  | 15  | +   | 1             | 0  | 0   | 10  | 0   | 0   | 0   |
| RYR3          | 33991131  | 15  | -   | 1             | 0  | 0   | 0   | 0   | 0   | 2   |
| TMCO5A        | 38034764  | 15  | +   | 1             | 0  | 0   | 0   | 22  | 0   | 0   |
| SPRED1        | 38608003  | 15  | -   | 1             | 0  | 0   | 0   | 3   | 0   | 0   |
| FAM98B        | 38770767  | 15  | -   | 1             | 0  | 0   | 3   | 0   | 0   | 0   |
| EIF2AK4       | 40229093  | 15  | +   | 1             | 0  | 0   | 19  | 0   | 0   | 0   |
| BUB1B         | 40465042  | 15  | -   | 2             | 0  | 0   | 0   | 432 | 3   | 0   |
| BUB1B         | 40469539  | 15  | +   | 1             | 0  | 0   | 0   | 0   | 13  | 0   |
| CASC5         | 40896714  | 15  | +   | 1             | 0  | 0   | 1   | 0   | 0   | 0   |
| NDUFAF1       | 41682955  | 15  | +   | 1             | 0  | 0   | 0   | 2   | 0   | 0   |
| MGA           | 41981067  | 15  | -   | 1             | 0  | 5   | 0   | 0   | 0   | 0   |

Supplementary Table 1: IS tracking over time

| Gene     | IS Locus  | Chr | Ori | N Times Found | M6 | M9  | M12 | M17 | M21 | M24 |
|----------|-----------|-----|-----|---------------|----|-----|-----|-----|-----|-----|
| MGA      | 42026439  | 15  | +   | 1             | 0  | 0   | 0   | 1   | 0   | 0   |
| MGA      | 42054398  | 15  | +   | 1             | 0  | 0   | 0   | 1   | 0   | 0   |
| MAPKBP1  | 42077989  | 15  | +   | 1             | 0  | 0   | 0   | 21  | 0   | 0   |
| STARD9   | 42944136  | 15  | +   | 1             | 0  | 0   | 1   | 0   | 0   | 0   |
| UBR1     | 43378849  | 15  | -   | 1             | 0  | 4   | 0   | 0   | 0   | 0   |
| TUBGCP4  | 43668434  | 15  | +   | 1             | 0  | 0   | 0   | 2   | 0   | 0   |
| TP53BP1  | 43769721  | 15  | -   | 1             | 0  | 2   | 0   | 0   | 0   | 0   |
| CTDSPL2  | 44764536  | 15  | +   | 1             | 0  | 4   | 0   | 0   | 0   | 0   |
| SEMA6D   | 47711231  | 15  | +   | 1             | 0  | 0   | 0   | 1   | 0   | 0   |
| MYO5A    | 52746172  | 15  | +   | 1             | 0  | 0   | 0   | 8   | 0   | 0   |
| KIAA1370 | 52947620  | 15  | -   | 1             | 0  | 0   | 0   | 8   | 0   | 0   |
| UNC13C   | 54983003  | 15  | +   | 1             | 0  | 0   | 0   | 34  | 0   | 0   |
| PIGB     | 55634688  | 15  | -   | 1             | 0  | 0   | 19  | 0   | 0   | 0   |
| CCPG1    | 55688577  | 15  | +   | 1             | 0  | 1   | 0   | 0   | 0   | 0   |
| TCF12    | 57234960  | 15  | +   | 1             | 0  | 3   | 0   | 0   | 0   | 0   |
| MYO1E    | 59510476  | 15  | -   | 1             | 0  | 0   | 0   | 2   | 0   | 0   |
| BNIP2    | 59957960  | 15  | -   | 1             | 0  | 0   | 35  | 0   | 0   | 0   |
| VPS13C   | 62176195  | 15  | +   | 1             | 0  | 0   | 0   | 0   | 0   | 17  |
| VPS13C   | 62269723  | 15  | +   | 1             | 0  | 0   | 0   | 0   | 1   | 0   |
| VPS13C   | 62270157  | 15  | -   | 1             | 0  | 2   | 0   | 0   | 0   | 0   |
| CSNK1G1  | 64542284  | 15  | +   | 1             | 0  | 0   | 0   | 5   | 0   | 0   |
| ZNF609   | 64848741  | 15  | +   | 1             | 0  | 0   | 40  | 0   | 0   | 0   |
| MTFMT    | 65311162  | 15  | +   | 1             | 0  | 0   | 6   | 0   | 0   | 0   |
| DENND4A  | 66058292  | 15  | -   | 1             | 0  | 0   | 0   | 0   | 0   | 1   |
| RAB11A   | 66179202  | 15  | -   | 1             | 0  | 0   | 1   | 0   | 0   | 0   |
| TIPIN    | 66642325  | 15  | +   | 1             | 0  | 0   | 0   | 0   | 0   | 27  |
| GLCE     | 69481479  | 15  | +   | 2             | 0  | 0   | 17  | 1   | 0   | 0   |
| UACA     | 70749183  | 15  | -   | 1             | 0  | 0   | 0   | 11  | 0   | 0   |
| MYO9A    | 72298697  | 15  | -   | 2             | 0  | 0   | 0   | 2   | 0   | 5   |
| NPTN     | 73910045  | 15  | +   | 1             | 0  | 0   | 0   | 0   | 3   | 0   |
| UBL7     | 74774947  | 15  | -   | 3             | 0  | 0   | 39  | 2   | 7   | 0   |
| EDC3     | 74955981  | 15  | -   | 1             | 0  | 0   | 2   | 0   | 0   | 0   |
| EDC3     | 74968915  | 15  | -   | 1             | 6  | 0   | 0   | 0   | 0   | 0   |
| MPI      | 75177302  | 15  | +   | 1             | 0  | 0   | 0   | 7   | 0   | 0   |
| SCAPER   | 77082201  | 15  | -   | 1             | 0  | 0   | 0   | 0   | 0   | 6   |
| HMG20A   | 77716784  | 15  | -   | 1             | 0  | 0   | 0   | 0   | 0   | 11  |
| HOMER2   | 83567428  | 15  | -   | 1             | 0  | 3   | 0   | 0   | 0   | 0   |
| AKAP13   | 85963588  | 15  | -   | 3             | 0  | 0   | 15  | 2   | 9   | 0   |
| AKAP13   | 86137197  | 15  | +   | 1             | 0  | 0   | 0   | 0   | 2   | 0   |
| AKAP13   | 86140773  | 15  | +   | 1             | 2  | 0   | 0   | 0   | 0   | 0   |
| CRTC3    | 91123697  | 15  | +   | 1             | 0  | 0   | 1   | 0   | 0   | 0   |
| BLM      | 91295407  | 15  | -   | 1             | 0  | 153 | 0   | 0   | 0   | 0   |
| BLM      | 91307644  | 15  | +   | 1             | 0  | 0   | 0   | 0   | 0   | 8   |
| MCTP2    | 94907279  | 15  | -   | 1             | 0  | 1   | 0   | 0   | 0   | 0   |
| LRRC28   | 99840101  | 15  | -   | 1             | 0  | 0   | 0   | 0   | 0   | 2   |
| MEF2A    | 100214658 | 15  | +   | 1             | 43 | 0   | 0   | 0   | 0   | 0   |
| CHSY1    | 101753940 | 15  | +   | 1             | 0  | 0   | 7   | 0   | 0   | 0   |
| TARSL2   | 102205148 | 15  | +   | 1             | 0  | 0   | 0   | 0   | 1   | 0   |
| NPRL3    | 181296    | 16  | -   | 1             | 0  | 1   | 0   | 0   | 0   | 0   |

Supplementary Table 1: IS tracking over time

| Gene      | IS Locus | Chr | Ori | N Times Found | M6 | M9  | M12 | M17 | M21 | M24 |
|-----------|----------|-----|-----|---------------|----|-----|-----|-----|-----|-----|
| AXIN1     | 369236   | 16  | +   | 3             | 0  | 6   | 0   | 6   | 0   | 4   |
| RAB11FIP3 | 537891   | 16  | -   | 1             | 0  | 0   | 0   | 0   | 1   | 0   |
| SOLH      | 588073   | 16  | -   | 1             | 0  | 0   | 8   | 0   | 0   | 0   |
| UNKL      | 1431358  | 16  | -   | 1             | 0  | 0   | 0   | 8   | 0   | 0   |
| HN1L      | 1734344  | 16  | +   | 1             | 0  | 0   | 0   | 0   | 0   | 1   |
| SPSB3     | 1829728  | 16  | -   | 1             | 0  | 6   | 0   | 0   | 0   | 0   |
| FAHD1     | 1884938  | 16  | -   | 1             | 0  | 0   | 0   | 15  | 0   | 0   |
| PKD1      | 2139517  | 16  | -   | 1             | 0  | 4   | 0   | 0   | 0   | 0   |
| ABCA3     | 2362132  | 16  | +   | 1             | 2  | 0   | 0   | 0   | 0   | 0   |
| ABCA3     | 2427330  | 16  | -   | 1             | 0  | 0   | 0   | 1   | 0   | 0   |
| ABCA3     | 2432519  | 16  | +   | 1             | 0  | 0   | 0   | 1   | 0   | 0   |
| CREBBP    | 3800922  | 16  | -   | 1             | 0  | 0   | 0   | 2   | 0   | 0   |
| CREBBP    | 3804789  | 16  | -   | 1             | 0  | 0   | 16  | 0   | 0   | 0   |
| CREBBP    | 3823552  | 16  | -   | 1             | 0  | 0   | 0   | 0   | 13  | 0   |
| CREBBP    | 3849961  | 16  | +   | 1             | 0  | 0   | 2   | 0   | 0   | 0   |
| CREBBP    | 3865522  | 16  | -   | 1             | 0  | 0   | 0   | 6   | 0   | 0   |
| CREBBP    | 3898362  | 16  | -   | 1             | 0  | 1   | 0   | 0   | 0   | 0   |
| CREBBP    | 3913529  | 16  | +   | 1             | 0  | 0   | 3   | 0   | 0   | 0   |
| CIITA     | 10949202 | 16  | +   | 1             | 0  | 0   | 4   | 0   | 0   | 0   |
| MKL2      | 14187151 | 16  | +   | 1             | 0  | 0   | 3   | 0   | 0   | 0   |
| C16orf45  | 15668897 | 16  | -   | 1             | 0  | 0   | 0   | 0   | 0   | 5   |
| XYLT1     | 17090215 | 16  | -   | 2             | 0  | 0   | 0   | 11  | 13  | 0   |
| XYLT1     | 17426783 | 16  | +   | 2             | 4  | 0   | 0   | 0   | 0   | 1   |
| XYLT1     | 17451476 | 16  | +   | 1             | 0  | 0   | 2   | 0   | 0   | 0   |
| CP110     | 19537254 | 16  | -   | 1             | 0  | 0   | 0   | 1   | 0   | 0   |
| LOC81691  | 20844270 | 16  | +   | 1             | 0  | 0   | 0   | 0   | 2   | 0   |
| LOC81691  | 20850265 | 16  | -   | 1             | 0  | 0   | 0   | 106 | 0   | 0   |
| DCUN1D3   | 20871099 | 16  | -   | 2             | 0  | 0   | 103 | 0   | 2   | 0   |
| METTL9    | 21550629 | 16  | +   | 1             | 0  | 1   | 0   | 0   | 0   | 0   |
| PRKCB     | 23996316 | 16  | +   | 1             | 0  | 0   | 1   | 0   | 0   | 0   |
| RBBP6     | 24558554 | 16  | -   | 1             | 0  | 1   | 0   | 0   | 0   | 0   |
| NSMCE1    | 27261434 | 16  | -   | 2             | 7  | 0   | 0   | 1   | 0   | 0   |
| IL21R     | 27406315 | 16  | -   | 1             | 0  | 0   | 15  | 0   | 0   | 0   |
| CCDC101   | 28591385 | 16  | +   | 1             | 0  | 2   | 0   | 0   | 0   | 0   |
| SPN       | 29596680 | 16  | +   | 1             | 0  | 0   | 0   | 0   | 0   | 1   |
| SPN       | 29664321 | 16  | +   | 1             | 2  | 0   | 0   | 0   | 0   | 0   |
| FBXL19    | 30944232 | 16  | +   | 1             | 0  | 0   | 0   | 0   | 0   | 7   |
| MYST1     | 31131593 | 16  | -   | 1             | 0  | 0   | 0   | 10  | 0   | 0   |
| PRSS36    | 31149448 | 16  | -   | 1             | 0  | 0   | 19  | 0   | 0   | 0   |
| FUS       | 31196819 | 16  | -   | 1             | 0  | 0   | 0   | 0   | 0   | 2   |
| ITGAM     | 31291605 | 16  | +   | 1             | 0  | 2   | 0   | 0   | 0   | 0   |
| C16orf58  | 31505450 | 16  | +   | 1             | 17 | 0   | 0   | 0   | 0   | 0   |
| SHCBP1    | 46640726 | 16  | +   | 1             | 0  | 3   | 0   | 0   | 0   | 0   |
| VPS35     | 46702825 | 16  | -   | 1             | 0  | 0   | 11  | 0   | 0   | 0   |
| C16orf87  | 46857472 | 16  | +   | 1             | 0  | 1   | 0   | 0   | 0   | 0   |
| N4BP1     | 48616663 | 16  | -   | 1             | 0  | 0   | 0   | 0   | 0   | 7   |
| PAPD5     | 50196604 | 16  | -   | 1             | 0  | 129 | 0   | 0   | 0   | 0   |
| LPCAT2    | 55591146 | 16  | +   | 1             | 0  | 1   | 0   | 0   | 0   | 0   |
| GOT2      | 58891114 | 16  | +   | 1             | 0  | 0   | 0   | 0   | 3   | 0   |

Supplementary Table 1: IS tracking over time

| Gene     | IS Locus | Chr | Ori | N Times Found | M6  | M9 | M12 | M17 | M21 | M24 |
|----------|----------|-----|-----|---------------|-----|----|-----|-----|-----|-----|
| CBFB     | 67116050 | 16  | +   | 1             | 0   | 0  | 0   | 0   | 0   | 2   |
| CTCF     | 67639022 | 16  | -   | 1             | 0   | 0  | 0   | 0   | 0   | 2   |
| PSMB10   | 67968220 | 16  | -   | 1             | 0   | 0  | 0   | 1   | 0   | 0   |
| NFATC3   | 68219371 | 16  | -   | 2             | 0   | 4  | 3   | 0   | 0   | 0   |
| NFATC3   | 68255233 | 16  | +   | 2             | 272 | 0  | 0   | 5   | 0   | 0   |
| NFAT5    | 69626410 | 16  | +   | 1             | 0   | 0  | 2   | 0   | 0   | 0   |
| NFAT5    | 69639531 | 16  | +   | 1             | 0   | 6  | 0   | 0   | 0   | 0   |
| NFAT5    | 69711316 | 16  | -   | 1             | 0   | 0  | 0   | 4   | 0   | 0   |
| KARS     | 75677729 | 16  | +   | 1             | 0   | 0  | 25  | 0   | 0   | 0   |
| SNAI3    | 88756352 | 16  | -   | 1             | 10  | 0  | 0   | 0   | 0   | 0   |
| ACSF3    | 89177042 | 16  | +   | 2             | 0   | 0  | 58  | 7   | 0   | 0   |
| ANKRD11  | 89415717 | 16  | -   | 1             | 0   | 0  | 2   | 0   | 0   | 0   |
| ANKRD11  | 89482963 | 16  | -   | 1             | 0   | 1  | 0   | 0   | 0   | 0   |
| ANKRD11  | 89506391 | 16  | -   | 1             | 0   | 6  | 0   | 0   | 0   | 0   |
| ANKRD11  | 89527985 | 16  | +   | 1             | 0   | 0  | 0   | 0   | 0   | 1   |
| ZNF276   | 89802767 | 16  | +   | 1             | 0   | 0  | 11  | 0   | 0   | 0   |
| FANCA    | 89829518 | 16  | -   | 1             | 0   | 0  | 0   | 0   | 0   | 1   |
| FANCA    | 89879141 | 16  | -   | 1             | 0   | 4  | 0   | 0   | 0   | 0   |
| DBNDD1   | 90066482 | 16  | -   | 1             | 0   | 3  | 0   | 0   | 0   | 0   |
| ABR      | 1002777  | 17  | +   | 1             | 18  | 0  | 0   | 0   | 0   | 0   |
| CRK      | 1325186  | 17  | -   | 1             | 8   | 0  | 0   | 0   | 0   | 0   |
| RPA1     | 1757099  | 17  | +   | 1             | 0   | 0  | 4   | 0   | 0   | 0   |
| SMG6     | 2022259  | 17  | +   | 1             | 0   | 0  | 0   | 1   | 0   | 0   |
| SMG6     | 2022779  | 17  | +   | 1             | 0   | 1  | 0   | 0   | 0   | 0   |
| SMG6     | 2039738  | 17  | +   | 1             | 3   | 0  | 0   | 0   | 0   | 0   |
| SMG6     | 2066922  | 17  | +   | 3             | 5   | 0  | 17  | 2   | 0   | 0   |
| SMG6     | 2109480  | 17  | +   | 1             | 0   | 0  | 0   | 0   | 0   | 1   |
| SMG6     | 2124843  | 17  | +   | 1             | 0   | 0  | 0   | 0   | 1   | 0   |
| SMG6     | 2144252  | 17  | +   | 1             | 0   | 0  | 0   | 2   | 0   | 0   |
| SMG6     | 2192040  | 17  | -   | 1             | 0   | 0  | 0   | 0   | 0   | 1   |
| PAFAH1B1 | 2548122  | 17  | +   | 1             | 0   | 5  | 0   | 0   | 0   | 0   |
| PAFAH1B1 | 2551954  | 17  | -   | 1             | 4   | 0  | 0   | 0   | 0   | 0   |
| PAFAH1B1 | 2575392  | 17  | +   | 1             | 0   | 1  | 0   | 0   | 0   | 0   |
| RAP1GAP2 | 2888530  | 17  | +   | 1             | 0   | 0  | 0   | 34  | 0   | 0   |
| C17orf85 | 3727155  | 17  | +   | 1             | 0   | 0  | 0   | 0   | 0   | 1   |
| ZZEF1    | 3922592  | 17  | +   | 1             | 0   | 0  | 38  | 0   | 0   | 0   |
| ZZEF1    | 3973781  | 17  | +   | 1             | 0   | 0  | 0   | 0   | 0   | 1   |
| ZZEF1    | 3988485  | 17  | +   | 1             | 0   | 0  | 3   | 0   | 0   | 0   |
| ANKFY1   | 4159812  | 17  | -   | 1             | 2   | 0  | 0   | 0   | 0   | 0   |
| UBE2G1   | 4188005  | 17  | -   | 1             | 0   | 0  | 0   | 1   | 0   | 0   |
| ZFP3     | 4983970  | 17  | -   | 1             | 0   | 0  | 15  | 0   | 0   | 0   |
| RABEP1   | 5201279  | 17  | -   | 1             | 0   | 0  | 1   | 0   | 0   | 0   |
| RABEP1   | 5253738  | 17  | -   | 1             | 0   | 0  | 0   | 0   | 0   | 1   |
| NUP88    | 5298393  | 17  | -   | 2             | 0   | 0  | 5   | 5   | 0   | 0   |
| XAF1     | 6672201  | 17  | +   | 1             | 0   | 0  | 0   | 3   | 0   | 0   |
| TEKT1    | 6763306  | 17  | -   | 1             | 0   | 0  | 1   | 0   | 0   | 0   |
| DLG4     | 7098115  | 17  | -   | 1             | 0   | 0  | 0   | 0   | 0   | 1   |
| POLR2A   | 7392112  | 17  | +   | 1             | 7   | 0  | 0   | 0   | 0   | 0   |
| POLR2A   | 7402503  | 17  | -   | 1             | 0   | 14 | 0   | 0   | 0   | 0   |

Supplementary Table 1: IS tracking over time

| Gene     | IS Locus | Chr | Ori | N Times Found | M6  | M9 | M12 | M17 | M21 | M24 |
|----------|----------|-----|-----|---------------|-----|----|-----|-----|-----|-----|
| TNFSF12  | 7441415  | 17  | +   | 1             | 0   | 0  | 0   | 0   | 0   | 2   |
| TP53     | 7574938  | 17  | +   | 1             | 0   | 16 | 0   | 0   | 0   | 0   |
| AURKB    | 8115592  | 17  | +   | 1             | 0   | 9  | 0   | 0   | 0   | 0   |
| CTC1     | 8144800  | 17  | +   | 1             | 0   | 1  | 0   | 0   | 0   | 0   |
| MYH10    | 8507520  | 17  | -   | 1             | 0   | 0  | 0   | 6   | 0   | 0   |
| MYH10    | 8508258  | 17  | +   | 1             | 0   | 0  | 6   | 0   | 0   | 0   |
| MYH10    | 8522639  | 17  | -   | 1             | 0   | 2  | 0   | 0   | 0   | 0   |
| MAP2K4   | 11956228 | 17  | -   | 1             | 0   | 0  | 0   | 5   | 0   | 0   |
| NCOR1    | 16044635 | 17  | -   | 1             | 0   | 0  | 2   | 0   | 0   | 0   |
| MPRIP    | 16990056 | 17  | +   | 3             | 0   | 12 | 0   | 3   | 0   | 11  |
| DHRS7B   | 21088272 | 17  | -   | 3             | 0   | 0  | 20  | 18  | 6   | 0   |
| WSB1     | 25631374 | 17  | +   | 1             | 0   | 0  | 0   | 0   | 0   | 1   |
| KIAA0100 | 26963530 | 17  | +   | 1             | 0   | 2  | 0   | 0   | 0   | 0   |
| PHF12    | 27266809 | 17  | -   | 1             | 0   | 0  | 0   | 3   | 0   | 0   |
| PIPOX    | 27385250 | 17  | -   | 1             | 0   | 0  | 0   | 0   | 0   | 14  |
| TAOK1    | 27805066 | 17  | -   | 1             | 0   | 0  | 0   | 0   | 0   | 8   |
| EFCAB5   | 28367497 | 17  | +   | 1             | 0   | 0  | 0   | 4   | 0   | 0   |
| CPD      | 28713013 | 17  | +   | 1             | 0   | 1  | 0   | 0   | 0   | 0   |
| CPD      | 28740508 | 17  | +   | 1             | 0   | 0  | 0   | 0   | 21  | 0   |
| NF1      | 29484344 | 17  | +   | 1             | 0   | 0  | 0   | 4   | 0   | 0   |
| NF1      | 29532821 | 17  | +   | 1             | 0   | 0  | 0   | 11  | 0   | 0   |
| NF1      | 29575415 | 17  | +   | 1             | 0   | 0  | 0   | 0   | 0   | 6   |
| NF1      | 29586874 | 17  | +   | 1             | 1   | 0  | 0   | 0   | 0   | 0   |
| RFFL     | 33396107 | 17  | -   | 2             | 0   | 1  | 0   | 2   | 0   | 0   |
| RFFL     | 33396970 | 17  | -   | 1             | 0   | 3  | 0   | 0   | 0   | 0   |
| SLFN11   | 33686404 | 17  | +   | 1             | 0   | 0  | 0   | 1   | 0   | 0   |
| SLFN12   | 33748354 | 17  | -   | 1             | 0   | 0  | 398 | 0   | 0   | 0   |
| TAF15    | 34160340 | 17  | +   | 1             | 0   | 0  | 7   | 0   | 0   | 0   |
| AATF     | 35391350 | 17  | +   | 1             | 0   | 0  | 89  | 0   | 0   | 0   |
| SYNRG    | 35911152 | 17  | -   | 1             | 0   | 0  | 0   | 0   | 0   | 2   |
| DDX52    | 36000661 | 17  | -   | 1             | 0   | 0  | 0   | 0   | 32  | 0   |
| TBC1D3   | 36383191 | 17  | +   | 1             | 0   | 0  | 0   | 3   | 0   | 0   |
| SOCS7    | 36528341 | 17  | +   | 1             | 4   | 0  | 0   | 0   | 0   | 0   |
| FBXL20   | 37546388 | 17  | -   | 1             | 0   | 0  | 0   | 0   | 13  | 0   |
| CASC3    | 38316430 | 17  | +   | 1             | 0   | 0  | 0   | 178 | 0   | 0   |
| WIPF2    | 38406329 | 17  | +   | 1             | 0   | 0  | 8   | 0   | 0   | 0   |
| WIPF2    | 38407346 | 17  | -   | 2             | 174 | 0  | 0   | 2   | 0   | 0   |
| SMARCE1  | 38802999 | 17  | +   | 2             | 0   | 0  | 0   | 7   | 0   | 4   |
| KRT33A   | 39500289 | 17  | +   | 1             | 0   | 0  | 0   | 1   | 0   | 0   |
| KLHL11   | 40010861 | 17  | +   | 1             | 0   | 9  | 0   | 0   | 0   | 0   |
| DNAJC7   | 40149991 | 17  | +   | 1             | 0   | 2  | 0   | 0   | 0   | 0   |
| STAT5B   | 40387135 | 17  | +   | 1             | 0   | 0  | 0   | 0   | 0   | 2   |
| STAT5B   | 40421776 | 17  | -   | 1             | 0   | 0  | 0   | 1   | 0   | 0   |
| STAT3    | 40501497 | 17  | -   | 1             | 0   | 0  | 1   | 0   | 0   | 0   |
| ATP6V0A1 | 40615692 | 17  | -   | 1             | 0   | 0  | 1   | 0   | 0   | 0   |
| BRCA1    | 41237456 | 17  | +   | 1             | 0   | 0  | 4   | 0   | 0   | 0   |
| NBR1     | 41347825 | 17  | +   | 1             | 11  | 0  | 0   | 0   | 0   | 0   |
| GPATCH8  | 42473501 | 17  | -   | 1             | 0   | 0  | 7   | 0   | 0   | 0   |
| GPATCH8  | 42509457 | 17  | -   | 1             | 0   | 0  | 0   | 0   | 8   | 0   |

Supplementary Table 1: IS tracking over time

| Gene      | IS Locus | Chr | Ori | N Times Found | M6 | M9  | M12 | M17 | M21 | M24 |
|-----------|----------|-----|-----|---------------|----|-----|-----|-----|-----|-----|
| GPATCH8   | 42548771 | 17  | -   | 1             | 0  | 0   | 20  | 0   | 0   | 0   |
| KIAA1267  | 44240800 | 17  | +   | 2             | 0  | 0   | 0   | 14  | 0   | 4   |
| KIAA1267  | 44241944 | 17  | -   | 1             | 0  | 0   | 9   | 0   | 0   | 0   |
| KIAA1267  | 44260079 | 17  | -   | 1             | 0  | 0   | 0   | 0   | 7   | 0   |
| NSF       | 44785229 | 17  | -   | 1             | 0  | 0   | 7   | 0   | 0   | 0   |
| CDC27     | 45217972 | 17  | +   | 1             | 0  | 1   | 0   | 0   | 0   | 0   |
| CDC27     | 45224786 | 17  | +   | 1             | 0  | 0   | 0   | 0   | 0   | 3   |
| CDC27     | 45255507 | 17  | -   | 1             | 0  | 6   | 0   | 0   | 0   | 0   |
| C17orf57  | 45470661 | 17  | +   | 2             | 0  | 0   | 0   | 14  | 0   | 4   |
| SKAP1     | 46280732 | 17  | +   | 1             | 0  | 0   | 0   | 26  | 0   | 0   |
| SKAP1     | 46331853 | 17  | +   | 1             | 0  | 0   | 11  | 0   | 0   | 0   |
| SKAP1     | 46410674 | 17  | -   | 2             | 0  | 6   | 0   | 4   | 0   | 0   |
| SKAP1     | 46414686 | 17  | +   | 1             | 4  | 0   | 0   | 0   | 0   | 0   |
| SPOP      | 47691839 | 17  | -   | 1             | 0  | 1   | 0   | 0   | 0   | 0   |
| MBTD1     | 49262270 | 17  | -   | 3             | 0  | 4   | 0   | 11  | 12  | 0   |
| STXBP4    | 53099643 | 17  | -   | 1             | 0  | 0   | 6   | 0   | 0   | 0   |
| ANKFN1    | 54309961 | 17  | -   | 1             | 0  | 0   | 0   | 0   | 1   | 0   |
| GDPD1     | 57349326 | 17  | +   | 1             | 0  | 121 | 0   | 0   | 0   | 0   |
| RPS6KB1   | 58025956 | 17  | -   | 1             | 0  | 0   | 13  | 0   | 0   | 0   |
| MED13     | 60133525 | 17  | +   | 1             | 0  | 0   | 0   | 12  | 0   | 0   |
| TANC2     | 61279017 | 17  | +   | 1             | 0  | 0   | 0   | 0   | 85  | 0   |
| DCAF7     | 61634260 | 17  | +   | 1             | 0  | 0   | 0   | 1   | 0   | 0   |
| CCDC47    | 61842606 | 17  | -   | 1             | 0  | 0   | 0   | 0   | 68  | 0   |
| DDX42     | 61868553 | 17  | +   | 1             | 2  | 0   | 0   | 0   | 0   | 0   |
| CEP95     | 62521265 | 17  | -   | 1             | 0  | 1   | 0   | 0   | 0   | 0   |
| NOL11     | 65733009 | 17  | +   | 1             | 0  | 0   | 0   | 0   | 1   | 0   |
| KPNA2     | 66100737 | 17  | -   | 1             | 0  | 1   | 0   | 0   | 0   | 0   |
| ABCA6     | 67132092 | 17  | +   | 1             | 0  | 0   | 0   | 0   | 0   | 10  |
| ABCA10    | 67211776 | 17  | -   | 1             | 0  | 1   | 0   | 0   | 0   | 0   |
| KCNJ2     | 68997467 | 17  | -   | 1             | 0  | 0   | 2   | 0   | 0   | 0   |
| KCTD2     | 73055361 | 17  | -   | 1             | 0  | 0   | 0   | 6   | 0   | 0   |
| GRB2      | 73340515 | 17  | -   | 1             | 0  | 0   | 0   | 3   | 0   | 0   |
| GRB2      | 73375479 | 17  | -   | 1             | 0  | 6   | 0   | 0   | 0   | 0   |
| RECQL5    | 73658846 | 17  | -   | 1             | 0  | 0   | 0   | 1   | 0   | 0   |
| UNK       | 73789822 | 17  | +   | 2             | 0  | 6   | 2   | 0   | 0   | 0   |
| UNK       | 73794567 | 17  | +   | 1             | 0  | 0   | 0   | 0   | 13  | 0   |
| UNK       | 73799279 | 17  | +   | 1             | 0  | 0   | 10  | 0   | 0   | 0   |
| ACOX1     | 73955732 | 17  | -   | 1             | 0  | 0   | 6   | 0   | 0   | 0   |
| C17orf106 | 73987582 | 17  | -   | 1             | 0  | 23  | 0   | 0   | 0   | 0   |
| SRP68     | 74057358 | 17  | +   | 2             | 0  | 0   | 11  | 12  | 0   | 0   |
| SRP68     | 74059460 | 17  | +   | 2             | 0  | 0   | 7   | 2   | 0   | 0   |
| FAM100B   | 74265900 | 17  | +   | 1             | 0  | 0   | 20  | 0   | 0   | 0   |
| PRCD      | 74551196 | 17  | -   | 1             | 0  | 0   | 0   | 1   | 0   | 0   |
| MFSD11    | 74754480 | 17  | -   | 1             | 0  | 0   | 0   | 0   | 10  | 0   |
| MFSD11    | 74763517 | 17  | -   | 1             | 0  | 0   | 0   | 0   | 0   | 2   |
| SEC14L1   | 75148094 | 17  | +   | 1             | 0  | 0   | 0   | 0   | 0   | 8   |
| SEC14L1   | 75159605 | 17  | +   | 2             | 0  | 0   | 0   | 309 | 6   | 0   |
| SEPT9     | 75304232 | 17  | -   | 1             | 0  | 0   | 0   | 8   | 0   | 0   |
| SEPT9     | 75329959 | 17  | +   | 1             | 0  | 0   | 5   | 0   | 0   | 0   |

Supplementary Table 1: IS tracking over time

| Gene     | IS Locus | Chr | Ori | N Times Found | M6 | M9 | M12 | M17 | M21 | M24 |
|----------|----------|-----|-----|---------------|----|----|-----|-----|-----|-----|
| SEPT9    | 75586267 | 17  | -   | 1             | 0  | 0  | 0   | 0   | 36  | 0   |
| TNRC6C   | 75970508 | 17  | +   | 2             | 0  | 14 | 0   | 17  | 0   | 0   |
| TNRC6C   | 75970962 | 17  | +   | 1             | 0  | 0  | 0   | 0   | 0   | 25  |
| TNRC6C   | 75990964 | 17  | +   | 1             | 0  | 0  | 0   | 8   | 0   | 0   |
| TNRC6C   | 76004322 | 17  | +   | 1             | 0  | 0  | 1   | 0   | 0   | 0   |
| TNRC6C   | 76007982 | 17  | +   | 2             | 4  | 0  | 0   | 13  | 0   | 0   |
| TNRC6C   | 76043440 | 17  | +   | 1             | 0  | 6  | 0   | 0   | 0   | 0   |
| TNRC6C   | 76044580 | 17  | -   | 1             | 0  | 0  | 10  | 0   | 0   | 0   |
| TNRC6C   | 76057383 | 17  | +   | 1             | 0  | 18 | 0   | 0   | 0   | 0   |
| C17orf99 | 76156163 | 17  | -   | 1             | 0  | 0  | 0   | 0   | 1   | 0   |
| C17orf99 | 76156167 | 17  | -   | 1             | 0  | 0  | 0   | 0   | 669 | 0   |
| AFMID    | 76197321 | 17  | -   | 1             | 0  | 0  | 0   | 0   | 0   | 4   |
| AFMID    | 76203781 | 17  | -   | 1             | 0  | 7  | 0   | 0   | 0   | 0   |
| TMEM235  | 76284638 | 17  | -   | 1             | 0  | 0  | 0   | 0   | 0   | 1   |
| CYTH1    | 76740547 | 17  | +   | 1             | 0  | 0  | 0   | 7   | 0   | 0   |
| CYTH1    | 76751831 | 17  | -   | 1             | 0  | 0  | 1   | 0   | 0   | 0   |
| USP36    | 76822867 | 17  | +   | 1             | 0  | 0  | 0   | 6   | 0   | 0   |
| TBC1D16  | 77898978 | 17  | +   | 1             | 0  | 0  | 0   | 3   | 0   | 0   |
| TBC1D16  | 77993410 | 17  | +   | 2             | 0  | 3  | 0   | 0   | 0   | 11  |
| RPTOR    | 78578199 | 17  | -   | 1             | 0  | 0  | 1   | 0   | 0   | 0   |
| RPTOR    | 78598417 | 17  | +   | 2             | 0  | 60 | 0   | 0   | 2   | 0   |
| RPTOR    | 78699663 | 17  | -   | 1             | 0  | 0  | 0   | 0   | 0   | 2   |
| RPTOR    | 78702880 | 17  | -   | 1             | 0  | 0  | 0   | 1   | 0   | 0   |
| RPTOR    | 78748001 | 17  | +   | 1             | 0  | 0  | 0   | 0   | 0   | 2   |
| RPTOR    | 78750092 | 17  | +   | 1             | 0  | 0  | 0   | 3   | 0   | 0   |
| RPTOR    | 78750693 | 17  | -   | 1             | 0  | 0  | 0   | 0   | 9   | 0   |
| RPTOR    | 78804741 | 17  | -   | 1             | 0  | 0  | 26  | 0   | 0   | 0   |
| AZ11     | 79186979 | 17  | -   | 1             | 0  | 2  | 0   | 0   | 0   | 0   |
| ACTG1    | 79478221 | 17  | -   | 1             | 0  | 0  | 0   | 0   | 0   | 3   |
| NPLOC4   | 79529132 | 17  | -   | 1             | 0  | 0  | 5   | 0   | 0   | 0   |
| NPLOC4   | 79554761 | 17  | +   | 1             | 0  | 0  | 0   | 2   | 0   | 0   |
| NPLOC4   | 79563053 | 17  | +   | 1             | 0  | 2  | 0   | 0   | 0   | 0   |
| NPLOC4   | 79579463 | 17  | +   | 1             | 0  | 0  | 0   | 3   | 0   | 0   |
| NPLOC4   | 79591966 | 17  | +   | 1             | 0  | 3  | 0   | 0   | 0   | 0   |
| NPLOC4   | 79601428 | 17  | +   | 1             | 0  | 0  | 0   | 11  | 0   | 0   |
| HGS      | 79666381 | 17  | -   | 1             | 0  | 0  | 0   | 1   | 0   | 0   |
| P4HB     | 79807359 | 17  | +   | 3             | 0  | 13 | 915 | 4   | 0   | 0   |
| MAFG     | 79879287 | 17  | +   | 1             | 0  | 0  | 1   | 0   | 0   | 0   |
| CSNK1D   | 80237032 | 17  | +   | 1             | 0  | 0  | 0   | 7   | 0   | 0   |
| CD7      | 80270039 | 17  | +   | 1             | 0  | 0  | 0   | 0   | 1   | 0   |
| WDR45L   | 80580812 | 17  | -   | 1             | 1  | 0  | 0   | 0   | 0   | 0   |
| RAB40B   | 80645196 | 17  | -   | 1             | 0  | 0  | 89  | 0   | 0   | 0   |
| B3GNTL1  | 80951155 | 17  | -   | 1             | 0  | 0  | 0   | 0   | 5   | 0   |
| B3GNTL1  | 80992728 | 17  | -   | 1             | 0  | 0  | 0   | 0   | 1   | 0   |
| B3GNTL1  | 81001310 | 17  | -   | 1             | 0  | 1  | 0   | 0   | 0   | 0   |
| METRNL   | 81111850 | 17  | -   | 1             | 0  | 0  | 0   | 0   | 8   | 0   |
| YES1     | 798117   | 18  | -   | 1             | 0  | 0  | 0   | 0   | 1   | 0   |
| SMCHD1   | 2697308  | 18  | -   | 1             | 0  | 0  | 0   | 3   | 0   | 0   |
| SMCHD1   | 2712830  | 18  | -   | 1             | 0  | 0  | 0   | 10  | 0   | 0   |



Supplementary Table 1: IS tracking over time

| Gene    | IS Locus | Chr | Ori | N Times Found | M6 | M9 | M12 | M17 | M21 | M24 |
|---------|----------|-----|-----|---------------|----|----|-----|-----|-----|-----|
| LPIN2   | 2950329  | 18  | +   | 1             | 0  | 0  | 0   | 0   | 0   | 2   |
| ROCK1   | 18630359 | 18  | -   | 1             | 0  | 0  | 5   | 0   | 0   | 0   |
| LAMA3   | 21494586 | 18  | -   | 1             | 0  | 0  | 1   | 0   | 0   | 0   |
| CDH2    | 26170987 | 18  | +   | 1             | 0  | 0  | 2   | 0   | 0   | 0   |
| FAM59A  | 29974641 | 18  | +   | 2             | 0  | 10 | 0   | 7   | 0   | 0   |
| DTNA    | 32150350 | 18  | +   | 1             | 0  | 0  | 0   | 6   | 0   | 0   |
| ZSCAN30 | 32861255 | 18  | -   | 1             | 0  | 0  | 0   | 1   | 0   | 0   |
| CELF4   | 35782482 | 18  | -   | 1             | 0  | 0  | 0   | 0   | 0   | 1   |
| CELF4   | 35978191 | 18  | +   | 1             | 0  | 0  | 0   | 15  | 0   | 0   |
| CELF4   | 36843035 | 18  | +   | 1             | 0  | 0  | 0   | 6   | 0   | 0   |
| CELF4   | 36885003 | 18  | -   | 1             | 0  | 0  | 11  | 0   | 0   | 0   |
| CELF4   | 37084234 | 18  | +   | 1             | 0  | 3  | 0   | 0   | 0   | 0   |
| SETBP1  | 42092323 | 18  | +   | 1             | 0  | 0  | 5   | 0   | 0   | 0   |
| SETBP1  | 42165373 | 18  | -   | 1             | 0  | 1  | 0   | 0   | 0   | 0   |
| CDH20   | 59150781 | 18  | -   | 2             | 0  | 0  | 227 | 0   | 1   | 0   |
| CDH20   | 59150785 | 18  | -   | 1             | 0  | 0  | 3   | 0   | 0   | 0   |
| CDH7    | 63499403 | 18  | +   | 1             | 0  | 0  | 1   | 0   | 0   | 0   |
| RTTN    | 67835838 | 18  | +   | 1             | 0  | 4  | 0   | 0   | 0   | 0   |
| SOCS6   | 68274906 | 18  | -   | 2             | 0  | 4  | 0   | 9   | 0   | 0   |
| ZNF407  | 72498314 | 18  | +   | 1             | 0  | 0  | 0   | 0   | 0   | 3   |
| POLRMT  | 631022   | 19  | -   | 1             | 0  | 2  | 0   | 0   | 0   | 0   |
| ARID3A  | 939622   | 19  | -   | 1             | 0  | 7  | 0   | 0   | 0   | 0   |
| ARID3A  | 975567   | 19  | -   | 3             | 0  | 0  | 2   | 2   | 56  | 0   |
| POLR2E  | 1089701  | 19  | -   | 1             | 0  | 1  | 0   | 0   | 0   | 0   |
| STK11   | 1191744  | 19  | +   | 1             | 0  | 0  | 9   | 0   | 0   | 0   |
| CIRBP   | 1273109  | 19  | -   | 2             | 0  | 8  | 0   | 3   | 0   | 0   |
| MUM1    | 1358403  | 19  | +   | 1             | 0  | 0  | 0   | 14  | 0   | 0   |
| MUM1    | 1361375  | 19  | -   | 1             | 0  | 0  | 0   | 0   | 0   | 1   |
| NDUFS7  | 1387732  | 19  | -   | 1             | 0  | 0  | 1   | 0   | 0   | 0   |
| ATP8B3  | 1810056  | 19  | +   | 1             | 0  | 0  | 0   | 2   | 0   | 0   |
| BTBD2   | 1996222  | 19  | -   | 1             | 0  | 0  | 102 | 0   | 0   | 0   |
| SPPL2B  | 2334498  | 19  | -   | 2             | 24 | 0  | 0   | 3   | 0   | 0   |
| GNG7    | 2571434  | 19  | -   | 1             | 0  | 0  | 0   | 1   | 0   | 0   |
| GNG7    | 2663574  | 19  | -   | 1             | 0  | 0  | 6   | 0   | 0   | 0   |
| GNG7    | 2672536  | 19  | +   | 1             | 0  | 0  | 0   | 1   | 0   | 0   |
| GNG7    | 2684598  | 19  | -   | 1             | 0  | 0  | 0   | 0   | 0   | 1   |
| GNG7    | 2690409  | 19  | +   | 1             | 0  | 2  | 0   | 0   | 0   | 0   |
| ZNF556  | 2873571  | 19  | -   | 1             | 0  | 0  | 0   | 45  | 0   | 0   |
| ZNF57   | 2915689  | 19  | +   | 1             | 0  | 0  | 0   | 2   | 0   | 0   |
| ZNF57   | 2917590  | 19  | +   | 1             | 0  | 0  | 0   | 0   | 3   | 0   |
| ZNF77   | 2925920  | 19  | -   | 1             | 0  | 0  | 0   | 5   | 0   | 0   |
| GNA11   | 3128542  | 19  | +   | 1             | 9  | 0  | 0   | 0   | 0   | 0   |
| GNA11   | 3128738  | 19  | -   | 1             | 0  | 0  | 9   | 0   | 0   | 0   |
| GNA15   | 3165957  | 19  | -   | 1             | 0  | 4  | 0   | 0   | 0   | 0   |
| NFIC    | 3417660  | 19  | +   | 1             | 0  | 0  | 0   | 0   | 2   | 0   |
| DAPK3   | 3962389  | 19  | -   | 1             | 0  | 0  | 0   | 21  | 0   | 0   |
| PIAS4   | 4024914  | 19  | -   | 1             | 5  | 0  | 0   | 0   | 0   | 0   |
| CHAF1A  | 4423257  | 19  | -   | 1             | 0  | 0  | 5   | 0   | 0   | 0   |
| SAFB    | 5650537  | 19  | +   | 1             | 0  | 0  | 0   | 0   | 0   | 33  |

Supplementary Table 1: IS tracking over time

| Gene     | IS Locus | Chr | Ori | N Times Found | M6 | M9 | M12 | M17 | M21 | M24 |
|----------|----------|-----|-----|---------------|----|----|-----|-----|-----|-----|
| RANBP3   | 5929321  | 19  | -   | 3             | 0  | 2  | 0   | 16  | 0   | 3   |
| RFX2     | 6059812  | 19  | +   | 2             | 0  | 1  | 11  | 0   | 0   | 0   |
| MLLT1    | 6248829  | 19  | +   | 1             | 0  | 0  | 8   | 0   | 0   | 0   |
| SH2D3A   | 6756966  | 19  | +   | 1             | 0  | 0  | 0   | 0   | 0   | 2   |
| VAV1     | 6810473  | 19  | +   | 1             | 0  | 0  | 0   | 0   | 0   | 5   |
| VAV1     | 6846800  | 19  | -   | 1             | 0  | 0  | 0   | 0   | 1   | 0   |
| INSR     | 7243880  | 19  | -   | 1             | 0  | 6  | 0   | 0   | 0   | 0   |
| ARHGEF18 | 7492875  | 19  | +   | 1             | 0  | 0  | 0   | 9   | 0   | 0   |
| ARHGEF18 | 7531311  | 19  | +   | 1             | 0  | 0  | 3   | 0   | 0   | 0   |
| FCER2    | 7771388  | 19  | -   | 2             | 2  | 0  | 0   | 1   | 0   | 0   |
| ZNF562   | 9765586  | 19  | +   | 2             | 0  | 0  | 0   | 0   | 9   | 1   |
| DNMT1    | 10274172 | 19  | +   | 1             | 0  | 0  | 3   | 0   | 0   | 0   |
| ZGLP1    | 10419262 | 19  | +   | 2             | 0  | 0  | 0   | 10  | 0   | 7   |
| KRI1     | 10668940 | 19  | -   | 1             | 0  | 0  | 0   | 0   | 13  | 0   |
| ILF3     | 10771049 | 19  | -   | 1             | 0  | 0  | 0   | 10  | 0   | 0   |
| ILF3     | 10771247 | 19  | -   | 1             | 0  | 0  | 0   | 1   | 0   | 0   |
| ILF3     | 10780585 | 19  | -   | 1             | 0  | 0  | 1   | 0   | 0   | 0   |
| ILF3     | 10787296 | 19  | +   | 1             | 0  | 0  | 0   | 0   | 0   | 2   |
| QTRT1    | 10814228 | 19  | -   | 2             | 0  | 0  | 24  | 3   | 0   | 0   |
| C19orf38 | 10963966 | 19  | -   | 1             | 0  | 0  | 0   | 0   | 2   | 0   |
| TSPAN16  | 11426782 | 19  | -   | 1             | 0  | 0  | 0   | 1   | 0   | 0   |
| TSPAN16  | 11426788 | 19  | -   | 1             | 0  | 0  | 0   | 10  | 0   | 0   |
| ZNF20    | 12215554 | 19  | +   | 2             | 0  | 0  | 0   | 12  | 6   | 0   |
| ZNF20    | 12216193 | 19  | -   | 1             | 0  | 0  | 0   | 0   | 8   | 0   |
| ZNF136   | 12289615 | 19  | +   | 1             | 0  | 0  | 0   | 16  | 0   | 0   |
| ZNF136   | 12313611 | 19  | -   | 1             | 0  | 0  | 0   | 0   | 0   | 5   |
| ZNF136   | 12324777 | 19  | -   | 2             | 10 | 0  | 0   | 1   | 0   | 0   |
| ZNF44    | 12416721 | 19  | +   | 1             | 0  | 0  | 2   | 0   | 0   | 0   |
| ZNF490   | 12700513 | 19  | -   | 1             | 0  | 0  | 0   | 0   | 14  | 0   |
| ZNF490   | 12704689 | 19  | -   | 1             | 0  | 3  | 0   | 0   | 0   | 0   |
| ZNF490   | 12710384 | 19  | +   | 1             | 0  | 0  | 0   | 5   | 0   | 0   |
| ASNA1    | 12852870 | 19  | -   | 1             | 0  | 0  | 0   | 0   | 0   | 1   |
| LYL1     | 13212437 | 19  | -   | 2             | 0  | 1  | 0   | 0   | 5   | 0   |
| CCDC130  | 13850826 | 19  | -   | 1             | 0  | 0  | 0   | 10  | 0   | 0   |
| NANOS3   | 13970316 | 19  | -   | 1             | 0  | 0  | 0   | 0   | 2   | 0   |
| C19orf57 | 14001115 | 19  | +   | 1             | 0  | 9  | 0   | 0   | 0   | 0   |
| RFX1     | 14107261 | 19  | -   | 2             | 0  | 0  | 0   | 189 | 1   | 0   |
| CD97     | 14476158 | 19  | -   | 2             | 0  | 0  | 0   | 6   | 20  | 0   |
| PKN1     | 14565483 | 19  | +   | 2             | 0  | 0  | 0   | 7   | 0   | 1   |
| PKN1     | 14570433 | 19  | -   | 1             | 0  | 0  | 0   | 19  | 0   | 0   |
| OR7C1    | 14900677 | 19  | -   | 1             | 0  | 0  | 0   | 0   | 9   | 0   |
| OR7A17   | 14998199 | 19  | -   | 1             | 0  | 0  | 2   | 0   | 0   | 0   |
| OR7C2    | 15036355 | 19  | +   | 1             | 0  | 0  | 6   | 0   | 0   | 0   |
| BRD4     | 15390032 | 19  | -   | 1             | 0  | 0  | 2   | 0   | 0   | 0   |
| AKAP8L   | 15522450 | 19  | -   | 1             | 0  | 0  | 2   | 0   | 0   | 0   |
| MED26    | 16720741 | 19  | -   | 1             | 0  | 2  | 0   | 0   | 0   | 0   |
| MYO9B    | 17209051 | 19  | +   | 1             | 0  | 6  | 0   | 0   | 0   | 0   |
| KIAA1683 | 18383125 | 19  | +   | 1             | 0  | 0  | 0   | 21  | 0   | 0   |
| ZNF681   | 23954960 | 19  | +   | 1             | 0  | 0  | 0   | 0   | 0   | 23  |

Supplementary Table 1: IS tracking over time

| Gene     | IS Locus | Chr | Ori | N Times Found | M6 | M9 | M12 | M17 | M21 | M24 |
|----------|----------|-----|-----|---------------|----|----|-----|-----|-----|-----|
| ZNF254   | 24282969 | 19  | +   | 1             | 0  | 3  | 0   | 0   | 0   | 0   |
| C19orf2  | 30476430 | 19  | -   | 1             | 0  | 1  | 0   | 0   | 0   | 0   |
| C19orf2  | 30503789 | 19  | -   | 1             | 0  | 0  | 5   | 0   | 0   | 0   |
| ANKRD27  | 33161390 | 19  | -   | 1             | 0  | 0  | 0   | 0   | 0   | 8   |
| C19orf55 | 36253375 | 19  | -   | 1             | 0  | 0  | 0   | 14  | 0   | 0   |
| TYROBP   | 36403990 | 19  | +   | 2             | 0  | 0  | 52  | 0   | 224 | 0   |
| C19orf46 | 36491300 | 19  | -   | 1             | 0  | 0  | 0   | 3   | 0   | 0   |
| ZNF529   | 37039045 | 19  | +   | 1             | 0  | 0  | 0   | 0   | 0   | 13  |
| ZNF345   | 37351651 | 19  | +   | 1             | 0  | 4  | 0   | 0   | 0   | 0   |
| ZNF383   | 37723369 | 19  | -   | 1             | 0  | 0  | 0   | 38  | 0   | 0   |
| ZNF527   | 37873525 | 19  | +   | 1             | 0  | 0  | 0   | 7   | 0   | 0   |
| ZNF570   | 37964883 | 19  | +   | 1             | 0  | 0  | 0   | 0   | 0   | 14  |
| ZFP30    | 38132727 | 19  | +   | 1             | 0  | 0  | 0   | 8   | 0   | 0   |
| SPINT2   | 38771515 | 19  | -   | 1             | 0  | 0  | 0   | 28  | 0   | 0   |
| IL29     | 39774382 | 19  | +   | 1             | 0  | 2  | 0   | 0   | 0   | 0   |
| AKT2     | 40806455 | 19  | +   | 1             | 20 | 0  | 0   | 0   | 0   | 0   |
| C19orf47 | 40848371 | 19  | -   | 1             | 0  | 8  | 0   | 0   | 0   | 0   |
| HNRNPUL1 | 41797660 | 19  | +   | 1             | 0  | 0  | 0   | 5   | 0   | 0   |
| CEACAM21 | 42074928 | 19  | -   | 1             | 0  | 0  | 2   | 0   | 0   | 0   |
| DEDD2    | 42720660 | 19  | -   | 1             | 0  | 0  | 11  | 0   | 0   | 0   |
| ZNF404   | 44379659 | 19  | +   | 1             | 0  | 0  | 0   | 0   | 4   | 0   |
| ZNF284   | 44580603 | 19  | -   | 1             | 0  | 0  | 2   | 0   | 0   | 0   |
| ZNF225   | 44623711 | 19  | -   | 1             | 0  | 0  | 0   | 4   | 0   | 0   |
| CEACAM16 | 45220206 | 19  | +   | 1             | 0  | 0  | 0   | 0   | 3   | 0   |
| CLPTM1   | 45463125 | 19  | -   | 1             | 0  | 0  | 0   | 0   | 7   | 0   |
| PRKD2    | 47215008 | 19  | +   | 1             | 0  | 0  | 4   | 0   | 0   | 0   |
| STRN4    | 47230838 | 19  | +   | 1             | 0  | 0  | 3   | 0   | 0   | 0   |
| AP2S1    | 47368183 | 19  | +   | 1             | 0  | 0  | 0   | 0   | 0   | 7   |
| ZC3H4    | 47609895 | 19  | -   | 1             | 0  | 1  | 0   | 0   | 0   | 0   |
| NAPA     | 48008330 | 19  | -   | 1             | 0  | 0  | 0   | 0   | 1   | 0   |
| NAPA     | 48011373 | 19  | +   | 1             | 0  | 3  | 0   | 0   | 0   | 0   |
| GLTSCR1  | 48133938 | 19  | -   | 1             | 0  | 0  | 0   | 0   | 0   | 4   |
| CARD8    | 48729288 | 19  | +   | 3             | 0  | 1  | 5   | 0   | 1   | 0   |
| CARD8    | 48737081 | 19  | -   | 2             | 0  | 0  | 0   | 7   | 0   | 2   |
| CARD8    | 48746838 | 19  | -   | 1             | 0  | 0  | 0   | 9   | 0   | 0   |
| NTN5     | 49174444 | 19  | +   | 1             | 0  | 0  | 0   | 2   | 0   | 0   |
| FUT2     | 49189728 | 19  | -   | 1             | 0  | 0  | 0   | 0   | 0   | 3   |
| GYS1     | 49473358 | 19  | -   | 1             | 0  | 0  | 0   | 1   | 0   | 0   |
| RUVBL2   | 49505674 | 19  | -   | 1             | 0  | 0  | 0   | 3   | 0   | 0   |
| TRPM4    | 49673634 | 19  | +   | 1             | 0  | 0  | 0   | 9   | 0   | 0   |
| TRPM4    | 49746160 | 19  | +   | 1             | 0  | 0  | 0   | 17  | 0   | 0   |
| SLC6A16  | 49821870 | 19  | +   | 1             | 0  | 0  | 0   | 4   | 0   | 0   |
| SLC6A16  | 49826584 | 19  | -   | 1             | 0  | 2  | 0   | 0   | 0   | 0   |
| SLC6A16  | 49826651 | 19  | +   | 1             | 5  | 0  | 0   | 0   | 0   | 0   |
| FLT3LG   | 49986474 | 19  | +   | 1             | 45 | 0  | 0   | 0   | 0   | 0   |
| NOSIP    | 50071742 | 19  | +   | 1             | 0  | 0  | 1   | 0   | 0   | 0   |
| PRR12    | 50111896 | 19  | +   | 1             | 0  | 0  | 0   | 0   | 125 | 0   |
| PRR12    | 50121003 | 19  | +   | 1             | 0  | 0  | 0   | 4   | 0   | 0   |
| TSKS     | 50236802 | 19  | -   | 1             | 0  | 0  | 10  | 0   | 0   | 0   |

Supplementary Table 1: IS tracking over time

| Gene           | IS Locus | Chr | Ori | N Times Found | M6 | M9  | M12 | M17 | M21 | M24 |
|----------------|----------|-----|-----|---------------|----|-----|-----|-----|-----|-----|
| CD33           | 51695410 | 19  | -   | 1             | 0  | 0   | 0   | 0   | 0   | 2   |
| CD33           | 51710690 | 19  | +   | 1             | 0  | 58  | 0   | 0   | 0   | 0   |
| CD33           | 51732765 | 19  | -   | 1             | 0  | 0   | 0   | 0   | 0   | 41  |
| ETFB           | 51859660 | 19  | -   | 1             | 0  | 0   | 0   | 0   | 11  | 0   |
| ZNF175         | 52088278 | 19  | +   | 1             | 0  | 0   | 0   | 9   | 0   | 0   |
| ZNF615         | 52509292 | 19  | +   | 1             | 0  | 0   | 0   | 3   | 0   | 0   |
| PPP2R1A        | 52745199 | 19  | -   | 1             | 6  | 0   | 0   | 0   | 0   | 0   |
| ZNF480         | 52820072 | 19  | +   | 1             | 0  | 1   | 0   | 0   | 0   | 0   |
| ZNF880         | 52878227 | 19  | +   | 1             | 0  | 0   | 0   | 23  | 0   | 0   |
| ZNF528         | 52910662 | 19  | +   | 1             | 0  | 0   | 0   | 12  | 0   | 0   |
| ZNF808         | 53037305 | 19  | +   | 1             | 0  | 0   | 0   | 2   | 0   | 0   |
| ZNF611         | 53232944 | 19  | -   | 1             | 0  | 0   | 0   | 0   | 0   | 2   |
| ZNF816-ZNF321P | 53417143 | 19  | -   | 1             | 0  | 0   | 1   | 0   | 0   | 0   |
| DPRX           | 54126072 | 19  | +   | 1             | 0  | 2   | 0   | 0   | 0   | 0   |
| LAIR1          | 54894391 | 19  | -   | 1             | 0  | 3   | 0   | 0   | 0   | 0   |
| GP6            | 55533524 | 19  | -   | 3             | 0  | 157 | 0   | 3   | 1   | 0   |
| PPP1R12C       | 55622279 | 19  | +   | 1             | 0  | 0   | 5   | 0   | 0   | 0   |
| ZNF628         | 55992525 | 19  | -   | 1             | 0  | 2   | 0   | 0   | 0   | 0   |
| ZSCAN5A        | 56790467 | 19  | +   | 1             | 0  | 0   | 0   | 3   | 0   | 0   |
| ZNF667         | 56960628 | 19  | -   | 1             | 43 | 0   | 0   | 0   | 0   | 0   |
| ZNF471         | 57024377 | 19  | -   | 1             | 0  | 0   | 13  | 0   | 0   | 0   |
| ZNF419         | 58006908 | 19  | -   | 1             | 0  | 0   | 0   | 0   | 3   | 0   |
| ZNF586         | 58304862 | 19  | -   | 3             | 0  | 0   | 24  | 0   | 159 | 19  |
| ZNF544         | 58765581 | 19  | -   | 1             | 0  | 0   | 0   | 0   | 0   | 1   |
| PSMF1          | 1131612  | 20  | +   | 1             | 0  | 5   | 0   | 0   | 0   | 0   |
| SDCBP2         | 1326251  | 20  | +   | 1             | 0  | 0   | 3   | 0   | 0   | 0   |
| SIRPD          | 1514569  | 20  | -   | 1             | 0  | 1   | 0   | 0   | 0   | 0   |
| EBF4           | 2705531  | 20  | -   | 1             | 0  | 0   | 0   | 12  | 0   | 0   |
| PTPRA          | 2917413  | 20  | +   | 1             | 0  | 0   | 0   | 13  | 0   | 0   |
| PTPRA          | 2920932  | 20  | -   | 1             | 0  | 0   | 0   | 7   | 0   | 0   |
| RNF24          | 3985064  | 20  | -   | 1             | 0  | 0   | 10  | 0   | 0   | 0   |
| RNF24          | 3987111  | 20  | -   | 1             | 0  | 0   | 0   | 0   | 0   | 1   |
| JAG1           | 11183552 | 20  | +   | 1             | 0  | 0   | 0   | 0   | 0   | 1   |
| ASXL1          | 31010166 | 20  | +   | 1             | 0  | 6   | 0   | 0   | 0   | 0   |
| C20orf112      | 31088901 | 20  | +   | 1             | 0  | 0   | 0   | 0   | 5   | 0   |
| CBFA2T2        | 32138016 | 20  | -   | 1             | 0  | 0   | 0   | 0   | 33  | 0   |
| GSS            | 33538304 | 20  | -   | 1             | 0  | 0   | 0   | 8   | 0   | 0   |
| UQCC           | 33981686 | 20  | -   | 1             | 0  | 0   | 0   | 4   | 0   | 0   |
| SAMHD1         | 35553623 | 20  | -   | 1             | 0  | 0   | 4   | 0   | 0   | 0   |
| RBL1           | 35646769 | 20  | +   | 1             | 0  | 0   | 17  | 0   | 0   | 0   |
| CTNBL1         | 36360711 | 20  | -   | 2             | 0  | 0   | 0   | 12  | 5   | 0   |
| STK4           | 43640225 | 20  | -   | 1             | 0  | 0   | 0   | 0   | 0   | 1   |
| DNTTIP1        | 44430013 | 20  | -   | 1             | 0  | 0   | 0   | 0   | 5   | 0   |
| ZSWIM3         | 44496324 | 20  | +   | 1             | 0  | 0   | 0   | 0   | 0   | 3   |
| ZNF334         | 45106069 | 20  | +   | 1             | 0  | 0   | 0   | 0   | 0   | 2   |
| NCOA3          | 46224306 | 20  | -   | 1             | 0  | 0   | 0   | 0   | 97  | 0   |
| CSE1L          | 47710835 | 20  | -   | 1             | 0  | 0   | 9   | 0   | 0   | 0   |
| STAU1          | 47791786 | 20  | -   | 2             | 0  | 0   | 3   | 0   | 0   | 9   |
| ADNP           | 49519540 | 20  | -   | 1             | 0  | 5   | 0   | 0   | 0   | 0   |

Supplementary Table 1: IS tracking over time

| Gene     | IS Locus | Chr | Ori | N Times Found | M6 | M9  | M12 | M17 | M21 | M24 |
|----------|----------|-----|-----|---------------|----|-----|-----|-----|-----|-----|
| DPM1     | 49571588 | 20  | +   | 1             | 3  | 0   | 0   | 0   | 0   | 0   |
| BCAS1    | 52424772 | 20  | -   | 1             | 0  | 0   | 1   | 0   | 0   | 0   |
| CDH26    | 58546531 | 20  | -   | 1             | 0  | 0   | 0   | 0   | 1   | 0   |
| COL9A3   | 61468513 | 20  | -   | 2             | 94 | 0   | 0   | 0   | 0   | 4   |
| GMEB2    | 62236873 | 20  | -   | 1             | 0  | 0   | 0   | 0   | 0   | 1   |
| GMEB2    | 62237363 | 20  | +   | 1             | 0  | 0   | 0   | 0   | 0   | 1   |
| STMN3    | 62266869 | 20  | -   | 1             | 0  | 0   | 0   | 0   | 170 | 0   |
| ZGPAT    | 62347035 | 20  | +   | 1             | 0  | 0   | 0   | 0   | 4   | 0   |
| ABHD16B  | 62483944 | 20  | +   | 1             | 0  | 0   | 22  | 0   | 0   | 0   |
| DNAJC5   | 62552538 | 20  | +   | 1             | 0  | 1   | 0   | 0   | 0   | 0   |
| PCMTD2   | 62904193 | 20  | -   | 1             | 0  | 0   | 0   | 5   | 0   | 0   |
| USP25    | 17462461 | 21  | -   | 1             | 0  | 0   | 0   | 0   | 0   | 2   |
| USP25    | 17687665 | 21  | -   | 1             | 0  | 0   | 20  | 0   | 0   | 0   |
| USP25    | 17711986 | 21  | +   | 1             | 0  | 0   | 71  | 0   | 0   | 0   |
| USP25    | 17945433 | 21  | +   | 1             | 0  | 42  | 0   | 0   | 0   | 0   |
| USP25    | 17962112 | 21  | +   | 1             | 0  | 0   | 0   | 0   | 0   | 1   |
| USP25    | 17996453 | 21  | -   | 1             | 0  | 0   | 0   | 2   | 0   | 0   |
| TMPRSS15 | 19980466 | 21  | +   | 1             | 0  | 0   | 13  | 0   | 0   | 0   |
| TMPRSS15 | 20465068 | 21  | +   | 2             | 0  | 0   | 0   | 5   | 1   | 0   |
| TMPRSS15 | 20997304 | 21  | +   | 1             | 0  | 2   | 0   | 0   | 0   | 0   |
| TMPRSS15 | 21022508 | 21  | +   | 1             | 0  | 0   | 0   | 0   | 0   | 3   |
| NCAM2    | 21708711 | 21  | -   | 1             | 0  | 0   | 5   | 0   | 0   | 0   |
| N6AMT1   | 29593553 | 21  | +   | 1             | 0  | 0   | 50  | 0   | 0   | 0   |
| LTN1     | 30338130 | 21  | -   | 1             | 0  | 0   | 0   | 0   | 0   | 6   |
| C21orf63 | 33914499 | 21  | +   | 1             | 0  | 0   | 0   | 0   | 0   | 9   |
| MRPS6    | 35463996 | 21  | -   | 1             | 0  | 0   | 0   | 0   | 0   | 1   |
| RUNX1    | 36289195 | 21  | -   | 1             | 0  | 125 | 0   | 0   | 0   | 0   |
| PDE9A    | 44148282 | 21  | -   | 1             | 0  | 0   | 0   | 0   | 0   | 1   |
| TRAPPC10 | 45442545 | 21  | +   | 1             | 0  | 0   | 0   | 145 | 0   | 0   |
| TRAPPC10 | 45456450 | 21  | +   | 1             | 0  | 0   | 0   | 0   | 14  | 0   |
| TRAPPC10 | 45473258 | 21  | -   | 1             | 0  | 0   | 0   | 3   | 0   | 0   |
| PWP2     | 45529368 | 21  | -   | 1             | 1  | 0   | 0   | 0   | 0   | 0   |
| PCNT     | 47757838 | 21  | +   | 1             | 0  | 0   | 0   | 0   | 0   | 4   |
| PCNT     | 47812086 | 21  | -   | 1             | 0  | 0   | 4   | 0   | 0   | 0   |
| DIP2A    | 47904509 | 21  | -   | 1             | 0  | 0   | 0   | 3   | 0   | 0   |
| DIP2A    | 47913867 | 21  | -   | 1             | 0  | 0   | 0   | 0   | 0   | 6   |
| DIP2A    | 47949316 | 21  | -   | 1             | 0  | 1   | 0   | 0   | 0   | 0   |
| DIP2A    | 47991300 | 21  | +   | 1             | 0  | 9   | 0   | 0   | 0   | 0   |
| CCT8L2   | 16870933 | 22  | -   | 1             | 0  | 0   | 0   | 0   | 0   | 8   |
| SEPT5    | 19681503 | 22  | -   | 1             | 0  | 0   | 0   | 10  | 0   | 0   |
| MAPK1    | 22192178 | 22  | +   | 2             | 0  | 0   | 0   | 146 | 4   | 0   |
| RGL4     | 24045082 | 22  | +   | 2             | 0  | 0   | 11  | 0   | 175 | 0   |
| CABIN1   | 24476562 | 22  | +   | 1             | 0  | 0   | 0   | 3   | 0   | 0   |
| SPECC1L  | 24674899 | 22  | -   | 1             | 0  | 0   | 11  | 0   | 0   | 0   |
| SPECC1L  | 24750336 | 22  | -   | 1             | 0  | 0   | 0   | 0   | 0   | 5   |
| SPECC1L  | 24765326 | 22  | +   | 1             | 0  | 0   | 0   | 35  | 0   | 0   |
| ADRBK2   | 26086140 | 22  | -   | 3             | 0  | 1   | 0   | 2   | 0   | 2   |
| ADRBK2   | 26099771 | 22  | +   | 1             | 0  | 0   | 0   | 28  | 0   | 0   |
| TTC28    | 28572595 | 22  | +   | 1             | 0  | 0   | 0   | 10  | 0   | 0   |

Supplementary Table 1: IS tracking over time

| Gene     | IS Locus | Chr | Ori | N Times Found | M6 | M9 | M12 | M17 | M21 | M24 |
|----------|----------|-----|-----|---------------|----|----|-----|-----|-----|-----|
| TTC28    | 28896904 | 22  | +   | 1             | 0  | 3  | 0   | 0   | 0   | 0   |
| NF2      | 30009142 | 22  | +   | 1             | 0  | 26 | 0   | 0   | 0   | 0   |
| MTMR3    | 30350190 | 22  | -   | 1             | 0  | 0  | 0   | 0   | 0   | 1   |
| HORMAD2  | 30566915 | 22  | -   | 1             | 0  | 0  | 10  | 0   | 0   | 0   |
| OSM      | 30669835 | 22  | +   | 1             | 11 | 0  | 0   | 0   | 0   | 0   |
| SFI1     | 31898224 | 22  | -   | 1             | 0  | 0  | 0   | 0   | 75  | 0   |
| RBFOX2   | 36264889 | 22  | -   | 1             | 0  | 0  | 0   | 19  | 0   | 0   |
| APOL3    | 36564711 | 22  | -   | 1             | 0  | 0  | 10  | 0   | 0   | 0   |
| APOL4    | 36574719 | 22  | -   | 1             | 0  | 5  | 0   | 0   | 0   | 0   |
| TXN2     | 36824848 | 22  | -   | 1             | 0  | 0  | 0   | 0   | 0   | 1   |
| CYTH4    | 37688860 | 22  | +   | 1             | 0  | 0  | 0   | 2   | 0   | 0   |
| KCNJ4    | 38775674 | 22  | +   | 1             | 1  | 0  | 0   | 0   | 0   | 0   |
| SMCR7L   | 39903543 | 22  | -   | 1             | 40 | 0  | 0   | 0   | 0   | 0   |
| TNRC6B   | 40602583 | 22  | +   | 1             | 0  | 0  | 0   | 0   | 1   | 0   |
| MKL1     | 40987660 | 22  | +   | 1             | 0  | 1  | 0   | 0   | 0   | 0   |
| ST13     | 41225384 | 22  | -   | 1             | 0  | 19 | 0   | 0   | 0   | 0   |
| ST13     | 41246854 | 22  | +   | 1             | 0  | 0  | 6   | 0   | 0   | 0   |
| XPNPEP3  | 41325828 | 22  | +   | 1             | 41 | 0  | 0   | 0   | 0   | 0   |
| MEI1     | 42134959 | 22  | +   | 1             | 0  | 1  | 0   | 0   | 0   | 0   |
| NAGA     | 42440299 | 22  | -   | 1             | 0  | 0  | 0   | 0   | 0   | 2   |
| TCF20    | 42622692 | 22  | +   | 1             | 10 | 0  | 0   | 0   | 0   | 0   |
| ATXN10   | 46107327 | 22  | +   | 2             | 0  | 0  | 1   | 5   | 0   | 0   |
| ATXN10   | 46122002 | 22  | +   | 1             | 0  | 0  | 0   | 0   | 0   | 1   |
| ATXN10   | 46192976 | 22  | -   | 1             | 0  | 0  | 4   | 0   | 0   | 0   |
| PPARA    | 46569743 | 22  | -   | 1             | 0  | 0  | 0   | 0   | 0   | 1   |
| TBC1D22A | 47324019 | 22  | -   | 1             | 7  | 0  | 0   | 0   | 0   | 0   |
| TBC1D22A | 47375653 | 22  | -   | 1             | 0  | 9  | 0   | 0   | 0   | 0   |
| ZBED4    | 50255878 | 22  | -   | 1             | 0  | 0  | 0   | 13  | 0   | 0   |
| ZBED4    | 50280682 | 22  | +   | 1             | 0  | 0  | 0   | 0   | 0   | 2   |
| ZBED4    | 50287216 | 22  | +   | 1             | 0  | 0  | 0   | 94  | 0   | 0   |
| IL17REL  | 50416250 | 22  | +   | 3             | 0  | 0  | 1   | 32  | 1   | 0   |
| MLC1     | 50519592 | 22  | +   | 1             | 0  | 0  | 0   | 2   | 0   | 0   |
| MOV10L1  | 50533834 | 22  | +   | 1             | 0  | 0  | 0   | 0   | 1   | 0   |
| TUBGCP6  | 50682467 | 22  | -   | 1             | 0  | 5  | 0   | 0   | 0   | 0   |
| SHANK3   | 51092222 | 22  | -   | 2             | 0  | 0  | 0   | 3   | 3   | 0   |
| TCEANC   | 13676596 | X   | +   | 1             | 0  | 0  | 0   | 23  | 0   | 0   |
| KLHL15   | 24033232 | X   | -   | 1             | 0  | 0  | 8   | 0   | 0   | 0   |
| DCAF8L1  | 27949935 | X   | -   | 1             | 0  | 0  | 0   | 7   | 0   | 0   |
| IL1RAPL1 | 29207160 | X   | +   | 2             | 0  | 0  | 0   | 1   | 0   | 2   |
| GK       | 30726489 | X   | +   | 1             | 1  | 0  | 0   | 0   | 0   | 0   |
| MAGEB16  | 35722828 | X   | -   | 1             | 0  | 0  | 8   | 0   | 0   | 0   |
| MID1IP1  | 38787660 | X   | +   | 1             | 0  | 0  | 0   | 0   | 26  | 0   |
| ZNF673   | 46076689 | X   | +   | 1             | 0  | 1  | 0   | 0   | 0   | 0   |
| SLC9A7   | 46598258 | X   | -   | 1             | 0  | 0  | 0   | 1   | 0   | 0   |
| RGN      | 46929235 | X   | -   | 1             | 19 | 0  | 0   | 0   | 0   | 0   |
| ZNF81    | 47680006 | X   | -   | 1             | 0  | 4  | 0   | 0   | 0   | 0   |
| WDR13    | 48491263 | X   | +   | 1             | 6  | 0  | 0   | 0   | 0   | 0   |
| MAGED1   | 51558158 | X   | +   | 1             | 1  | 0  | 0   | 0   | 0   | 0   |
| PHF8     | 53991550 | X   | -   | 1             | 7  | 0  | 0   | 0   | 0   | 0   |

**Supplementary Table 1: IS tracking over time**

| <b>Gene</b> | <b>IS Locus</b> | <b>Chr</b> | <b>Ori</b> | <b>N Times Found</b> | <b>M6</b> | <b>M9</b> | <b>M12</b> | <b>M17</b> | <b>M21</b> | <b>M24</b> |
|-------------|-----------------|------------|------------|----------------------|-----------|-----------|------------|------------|------------|------------|
| FAM120C     | 54184326        | X          | +          | 1                    | 0         | 0         | 0          | 1          | 0          | 0          |
| VSIG4       | 65129828        | X          | +          | 1                    | 0         | 0         | 0          | 0          | 0          | 8          |
| GPR174      | 78415530        | X          | +          | 1                    | 0         | 0         | 0          | 10         | 0          | 0          |
| ZNF711      | 84508408        | X          | +          | 3                    | 0         | 1         | 90         | 0          | 1          | 0          |
| ZNF711      | 84512413        | X          | +          | 1                    | 0         | 0         | 0          | 11         | 0          | 0          |
| DIAPH2      | 96110052        | X          | +          | 1                    | 0         | 1         | 0          | 0          | 0          | 0          |
| DCX         | 110683592       | X          | -          | 1                    | 0         | 0         | 56         | 0          | 0          | 0          |
| ZCCHC16     | 111372330       | X          | -          | 1                    | 0         | 1         | 0          | 0          | 0          | 0          |
| WDR44       | 117576574       | X          | +          | 1                    | 0         | 0         | 26         | 0          | 0          | 0          |
| GRIA3       | 121851596       | X          | -          | 1                    | 0         | 0         | 1          | 0          | 0          | 0          |
| STAG2       | 123142584       | X          | +          | 1                    | 31        | 0         | 0          | 0          | 0          | 0          |
| STAG2       | 123153281       | X          | +          | 1                    | 0         | 0         | 0          | 9          | 0          | 0          |
| MAGEC2      | 141604838       | X          | -          | 1                    | 0         | 0         | 0          | 8          | 0          | 0          |
| FMR1        | 146505542       | X          | -          | 1                    | 0         | 0         | 6          | 0          | 0          | 0          |
| MECP2       | 153310336       | X          | -          | 1                    | 0         | 0         | 0          | 4          | 0          | 0          |
| MECP2       | 153337250       | X          | +          | 1                    | 0         | 1         | 0          | 0          | 0          | 0          |
| MECP2       | 153349746       | X          | -          | 2                    | 5         | 0         | 3          | 0          | 0          | 0          |
| MPP1        | 154017708       | X          | +          | 1                    | 0         | 0         | 2          | 0          | 0          | 0          |
| BRCC3       | 154323944       | X          | -          | 1                    | 0         | 0         | 19         | 0          | 0          | 0          |
| BRCC3       | 154337073       | X          | -          | 1                    | 0         | 0         | 0          | 1          | 0          | 0          |
| CLIC2       | 154552689       | X          | +          | 1                    | 0         | 0         | 0          | 1          | 0          | 0          |
| TBL1Y       | 7098476         | Y          | +          | 1                    | 0         | 0         | 0          | 0          | 0          | 1          |
| CD24        | 21175963        | Y          | +          | 1                    | 0         | 2         | 0          | 0          | 0          | 0          |
